# Supplementary material for: Environmental pollution is associated with increased risk of psychiatric disorders in the US and Denmark
Source: PLoS Biol. 2019 Aug 20;17(8):e3000353. doi: 10.1371/journal.pbio.3000353 (PMC6701746; doi:10.1371/journal.pbio.3000353)
Supplement: S5 Table — (XLSX) [file pbio.3000353.s021.xlsx]

## Sheet: US Analysis
	Names	post.mean	l-95% CI	u-95% CI	exp(mean)	exp(l-95% CI)	exp(u-95% CI)	pMCMC
	(Intercept)	-8.12885	-8.37172	-7.87851	0.000294907	0.000231317	0.000378797	1e-05			Bipolar Disorder ~ LOG(Offset) + Sex + Age + Water_EQI + Land_EQI + Built_EQI + Good_days + Bad_days + Pop_Density + Perc_Am_Ind + Perc_Asian + Perc_Black_Hisp + Perc_Black_non_Hisp + Perc_Pacific + Perc_White_Hisp + Perc_White_non_Hisp + Perc_Insured + Perc_Poor + Perc_Urban + Income + a_teca_ln + a_112tca_ln + a_dbcp_ln + a_tdi_ln + a_2clacephen_ln + a_2np_ln + a_pnp_ln + a_ch3cn_ln + a_acetoph…
	LOG(Offset)	1	0.999938	1.00006	2.71828	2.71811	2.71845	1e-05
	SexM	-0.414814	-0.42305	-0.406516	0.660463	0.655046	0.665966	1e-05
	Age6_17i	2.50723	2.47747	2.53704	12.2709	11.911	12.6422	1e-05
	Age18_30i	2.65029	2.62036	2.67986	14.1582	13.7406	14.5831	1e-05
	Age31_40i	2.86409	2.83547	2.89423	17.5331	17.0384	18.0695	1e-05
	Age41_50i	2.7876	2.75855	2.8179	16.2421	15.777	16.7416	1e-05
	Age51_65i	2.54122	2.51166	2.57077	12.6952	12.3253	13.0758	1e-05
	Age66plus	1.92692	1.61616	2.22618	6.86832	5.03374	9.26441	1e-05
	Water_EQI2	-0.0554075	-0.118359	0.00499796	0.9461	0.888377	1.00501	0.0396
	Water_EQI3	-0.0436865	-0.108551	0.0199891	0.957254	0.897134	1.02019	0.0938
	Water_EQI4	0.00118552	-0.0655285	0.065395	1.00119	0.936572	1.06758	0.4828
	Water_EQI5	-0.0253451	-0.0921921	0.0382647	0.974973	0.91193	1.03901	0.223
	Water_EQI6	-0.027756	-0.0978354	0.0381147	0.972626	0.906798	1.03885	0.2122
	Water_EQI7	-0.0357611	-0.108797	0.0336485	0.964871	0.896913	1.03422	0.1598
	Land_EQI2	0.00297243	-0.0464982	0.0491697	1.00298	0.954566	1.0504	0.4553
	Land_EQI3	-0.0146362	-0.0672509	0.0380036	0.98547	0.934961	1.03873	0.2925
	Land_EQI4	0.00833059	-0.0490871	0.0625895	1.00837	0.952098	1.06459	0.3833
	Land_EQI5	0.0172835	-0.0466734	0.0776425	1.01743	0.954399	1.08074	0.2922
	Land_EQI6	-0.0350364	-0.100731	0.0319632	0.96557	0.904176	1.03248	0.1503
	Land_EQI7	0.0363099	-0.0309816	0.109176	1.03698	0.969493	1.11536	0.1538
	Built_EQI2	0.0484019	-0.000939165	0.098208	1.04959	0.999061	1.10319	0.0283
	Built_EQI3	0.0459894	-0.00429077	0.0985865	1.04706	0.995718	1.10361	0.0425
	Built_EQI4	0.0126974	-0.0389958	0.0686616	1.01278	0.961755	1.07107	0.3215
	Built_EQI5	0.0536624	-0.00488007	0.107629	1.05513	0.995132	1.11363	0.0322
	Built_EQI6	0.0391111	-0.0218574	0.0980179	1.03989	0.97838	1.10298	0.1017
	Built_EQI7	0.0666154	0.00475013	0.130142	1.06888	1.00476	1.13899	0.0189
	Good_days2	-0.0284694	-0.0844103	0.0287225	0.971932	0.919054	1.02914	0.1625
	Good_days3	-0.0790063	-0.142233	-0.0132757	0.924034	0.867419	0.986812	0.0082
	Good_days4	-0.119081	-0.189748	-0.0502341	0.887736	0.827167	0.951007	0.0004
	Good_days5	-0.104614	-0.177862	-0.0385307	0.900672	0.837058	0.962202	0.0016
	Good_days6	-0.0819353	-0.156402	-0.0107788	0.921332	0.855215	0.989279	0.0143
	Good_days7	-0.15733	-0.235946	-0.0733469	0.854422	0.789824	0.929278	1e-05
	Bad_days2	0.0896772	0.0421071	0.138324	1.09382	1.04301	1.14835	0.0001
	Bad_days3	0.0413611	-0.0158902	0.100545	1.04223	0.984235	1.10577	0.0821
	Bad_days4	0.0212719	-0.0442822	0.0872371	1.0215	0.956684	1.09116	0.2603
	Bad_days5	0.053497	-0.0137828	0.126762	1.05495	0.986312	1.13515	0.0676
	Bad_days6	0.0158263	-0.0620103	0.0935469	1.01595	0.939873	1.09806	0.3476
	Bad_days7	-0.0966796	-0.183753	-0.00668251	0.907847	0.832141	0.99334	0.0158
	Pop_Density2	0.0326938	-0.0443788	0.114965	1.03323	0.956592	1.12183	0.2138
	Pop_Density3	0.0255659	-0.0694815	0.119786	1.0259	0.932877	1.12726	0.3004
	Pop_Density4	0.0491805	-0.0494249	0.150402	1.05041	0.951777	1.1623	0.1681
	Pop_Density5	0.0637123	-0.0422755	0.168829	1.06579	0.958606	1.18392	0.117
	Pop_Density6	0.0934339	-0.01761	0.207188	1.09794	0.982544	1.23021	0.0514
	Pop_Density7	0.0787776	-0.047256	0.206847	1.08196	0.953843	1.22979	0.1148
	Perc_Am_Ind2	0.0230974	-0.0170166	0.0681488	1.02337	0.983127	1.07052	0.144
	Perc_Am_Ind3	0.0275683	-0.0181406	0.0728651	1.02795	0.982023	1.07559	0.1164
	Perc_Am_Ind4	0.0474272	-0.000436125	0.0978587	1.04857	0.999564	1.10281	0.0284
	Perc_Am_Ind5	0.0793558	0.0263258	0.132445	1.08259	1.02668	1.14162	0.0016
	Perc_Am_Ind6	0.0652645	0.00433748	0.126249	1.06744	1.00435	1.13456	0.0172
	Perc_Am_Ind7	0.11647	0.045144	0.187889	1.12352	1.04618	1.2067	0.0013
	Perc_Asian2	0.0286006	-0.0218958	0.0792929	1.02901	0.978342	1.08252	0.1396
	Perc_Asian3	0.0225085	-0.0344542	0.0771248	1.02276	0.966133	1.08018	0.2153
	Perc_Asian4	0.0294852	-0.0262294	0.0848726	1.02992	0.974112	1.08858	0.1492
	Perc_Asian5	0.0360724	-0.0209908	0.0975232	1.03673	0.979228	1.10244	0.1193
	Perc_Asian6	0.0424933	-0.0201791	0.107218	1.04341	0.980023	1.11318	0.0972
	Perc_Asian7	0.0460553	-0.0311565	0.113612	1.04713	0.969324	1.12032	0.1098
	Perc_Black_Hisp2	0.00564667	-0.0457297	0.0593468	1.00566	0.9553	1.06114	0.4215
	Perc_Black_Hisp3	0.0361746	-0.021293	0.0927458	1.03684	0.978932	1.09718	0.1057
	Perc_Black_Hisp4	-0.0188361	-0.0826909	0.0402454	0.98134	0.920636	1.04107	0.2786
	Perc_Black_Hisp5	0.00200887	-0.0686402	0.0694491	1.00201	0.933663	1.07192	0.4736
	Perc_Black_Hisp6	-0.00349114	-0.0770702	0.0721465	0.996515	0.925825	1.07481	0.4701
	Perc_Black_Hisp7	-0.0472322	-0.134114	0.0339191	0.953866	0.87449	1.0345	0.1329
	Perc_Black_non_Hisp2	0.060652	0.00493489	0.117726	1.06253	1.00495	1.12494	0.0179
	Perc_Black_non_Hisp3	0.0703094	0.0112902	0.130169	1.07284	1.01135	1.13902	0.0112
	Perc_Black_non_Hisp4	0.122242	0.0568749	0.190169	1.13003	1.05852	1.20945	0.0003
	Perc_Black_non_Hisp5	0.153976	0.0795242	0.229085	1.16646	1.08277	1.25745	1e-05
	Perc_Black_non_Hisp6	0.178295	0.0920463	0.263401	1.19518	1.09642	1.30135	1e-05
	Perc_Black_non_Hisp7	0.246336	0.135805	0.351451	1.27933	1.14546	1.42113	1e-05
	Perc_Pacific2	0.0817884	0.0250743	0.139721	1.08523	1.02539	1.14995	0.0023
	Perc_Pacific3	0.0108976	-0.0380442	0.0594614	1.01096	0.96267	1.06126	0.3278
	Perc_Pacific4	0.0243378	-0.0245346	0.0696801	1.02464	0.975764	1.07217	0.1527
	Perc_Pacific5	0.0475763	0.000170207	0.0953711	1.04873	1.00017	1.10007	0.024
	Perc_Pacific6	-0.00063666	-0.0489328	0.0520683	0.999364	0.952245	1.05345	0.4904
	Perc_Pacific7	0.0142695	-0.0382565	0.0695486	1.01437	0.962466	1.07202	0.3069
	Perc_White_Hisp2	0.0240333	-0.0239831	0.0702403	1.02432	0.976302	1.07277	0.1663
	Perc_White_Hisp3	0.0229579	-0.0272962	0.0751847	1.02322	0.973073	1.07808	0.1929
	Perc_White_Hisp4	0.0400428	-0.0154643	0.0986321	1.04086	0.984655	1.10366	0.0841
	Perc_White_Hisp5	0.0320687	-0.0242382	0.0946535	1.03259	0.976053	1.09928	0.1499
	Perc_White_Hisp6	0.041933	-0.0277572	0.111249	1.04282	0.972625	1.11767	0.1159
	Perc_White_Hisp7	0.0388156	-0.0533604	0.123815	1.03958	0.948038	1.13181	0.1924
	Perc_White_non_Hisp2	0.199116	0.151068	0.247158	1.22032	1.16308	1.28038	1e-05
	Perc_White_non_Hisp3	0.325954	0.254555	0.393504	1.38535	1.28989	1.48217	1e-05
	Perc_White_non_Hisp4	0.364988	0.28033	0.449793	1.4405	1.32357	1.56799	1e-05
	Perc_White_non_Hisp5	0.370509	0.277763	0.470437	1.44847	1.32017	1.60069	1e-05
	Perc_White_non_Hisp6	0.401319	0.300757	0.511121	1.49379	1.35088	1.66716	1e-05
	Perc_White_non_Hisp7	0.442841	0.32102	0.557373	1.55712	1.37853	1.74608	1e-05
	Perc_Insured2	0.0277729	-0.018654	0.0739276	1.02816	0.981519	1.07673	0.125
	Perc_Insured3	0.0238412	-0.0251827	0.0726264	1.02413	0.975132	1.07533	0.1681
	Perc_Insured4	0.0622201	0.0103104	0.11551	1.0642	1.01036	1.12245	0.0093
	Perc_Insured5	0.078911	0.0225284	0.136314	1.08211	1.02278	1.14604	0.004
	Perc_Insured6	0.0862673	0.0228137	0.148886	1.0901	1.02308	1.16054	0.0038
	Perc_Insured7	0.0508982	-0.0179798	0.119734	1.05222	0.982181	1.1272	0.0767
	Perc_Poor2	0.0230546	-0.0212988	0.0665342	1.02332	0.978926	1.0688	0.1588
	Perc_Poor3	0.00653064	-0.0423337	0.058928	1.00655	0.95855	1.0607	0.4015
	Perc_Poor4	-0.0244496	-0.0777733	0.0327021	0.975847	0.925174	1.03324	0.1936
	Perc_Poor5	0.00475933	-0.05732	0.0640122	1.00477	0.944292	1.06611	0.4382
	Perc_Poor6	-0.0438758	-0.110553	0.023565	0.957073	0.895339	1.02384	0.1018
	Perc_Poor7	-0.0655678	-0.145293	0.0162647	0.936536	0.864769	1.0164	0.0551
	Perc_Urban2	-0.0278627	-0.0867775	0.0331651	0.972522	0.916881	1.03372	0.1808
	Perc_Urban3	-0.0312397	-0.0923159	0.0268853	0.969243	0.911817	1.02725	0.152
	Perc_Urban4	-0.0117936	-0.0724998	0.055689	0.988276	0.930066	1.05727	0.355
	Perc_Urban5	-0.00968585	-0.0815381	0.0570078	0.990361	0.921698	1.05866	0.3927
	Perc_Urban6	0.00442111	-0.0774552	0.0775535	1.00443	0.925468	1.08064	0.4559
	Perc_Urban7	-0.0120311	-0.118789	0.0868	0.988041	0.887995	1.09068	0.411
	Income2	0.0197543	-0.0283794	0.0669204	1.01995	0.97202	1.06921	0.206
	Income3	0.0264415	-0.0242078	0.0781547	1.02679	0.976083	1.08129	0.1552
	Income4	0.0326176	-0.0226657	0.0862966	1.03316	0.977589	1.09013	0.1207
	Income5	0.0347265	-0.0252351	0.0938344	1.03534	0.975081	1.09838	0.1284
	Income6	-0.0250619	-0.0876023	0.0399869	0.97525	0.916125	1.0408	0.2187
	Income7	-0.0278847	-0.096985	0.0466429	0.9725	0.90757	1.04775	0.2199
	a_teca_ln2	0.125978	0.0316424	0.212196	1.13426	1.03215	1.23639	0.0035
	a_teca_ln3	0.102422	-0.00936599	0.205283	1.10785	0.990678	1.22787	0.0307
	a_teca_ln4	0.0725338	-0.0549916	0.203446	1.07523	0.946493	1.22562	0.1349
	a_teca_ln5	0.11974	-0.04189	0.284073	1.1272	0.958975	1.32853	0.077
	a_teca_ln6	0.0717989	-0.122337	0.25953	1.07444	0.884851	1.29632	0.2402
	a_teca_ln7	0.140787	-0.085044	0.346218	1.15118	0.918472	1.41371	0.1049
	a_112tca_ln2	-0.0920437	-0.176943	-0.00921404	0.912065	0.837827	0.990828	0.0157
	a_112tca_ln3	-0.0641818	-0.147416	0.0283337	0.937834	0.862935	1.02874	0.0749
	a_112tca_ln4	-0.0468842	-0.135809	0.0447103	0.954198	0.87301	1.04572	0.1538
	a_112tca_ln5	-0.0251655	-0.117673	0.0624087	0.975148	0.888986	1.0644	0.2932
	a_112tca_ln6	-0.0469252	-0.138965	0.0434551	0.954159	0.870259	1.04441	0.1597
	a_112tca_ln7	-0.0332332	-0.130447	0.0617701	0.967313	0.877703	1.06372	0.2459
	a_dbcp_ln2	0.0545444	-0.02273	0.133566	1.05606	0.977526	1.1429	0.0916
	a_dbcp_ln3	0.0515042	-0.012642	0.116285	1.05285	0.987438	1.12332	0.0605
	a_dbcp_ln4	0.0682713	-0.00372937	0.136762	1.07066	0.996278	1.14655	0.0291
	a_dbcp_ln5	0.0674984	-0.00440798	0.144463	1.06983	0.995602	1.15542	0.0374
	a_dbcp_ln6	0.0391299	-0.0459345	0.118523	1.03991	0.955104	1.12583	0.1785
	a_dbcp_ln7	0.102031	0.0116441	0.194348	1.10742	1.01171	1.21452	0.0131
	a_tdi_ln2	0.0443122	-0.0222192	0.114239	1.04531	0.978026	1.12102	0.1044
	a_tdi_ln3	0.0682731	-0.00156937	0.139343	1.07066	0.998432	1.14952	0.0304
	a_tdi_ln4	0.0442024	-0.026195	0.120411	1.04519	0.974145	1.12796	0.1247
	a_tdi_ln5	0.0344602	-0.0426591	0.109653	1.03506	0.958238	1.11589	0.1854
	a_tdi_ln6	0.0221266	-0.0558279	0.0985853	1.02237	0.945702	1.10361	0.2885
	a_tdi_ln7	-0.0158002	-0.0979499	0.0653108	0.984324	0.906694	1.06749	0.3553
	a_2clacephen_ln2	-0.174888	-0.287374	-0.068227	0.839551	0.750231	0.934048	0.0012
	a_2clacephen_ln3	-0.14415	-0.246838	-0.0412262	0.865758	0.781267	0.959612	0.0035
	a_2clacephen_ln4	-0.0843987	-0.193979	0.0221131	0.919065	0.823675	1.02236	0.0612
	a_2clacephen_ln5	-0.0804634	-0.198044	0.0386625	0.922689	0.820334	1.03942	0.0869
	a_2clacephen_ln6	-0.0882286	-0.215378	0.0322961	0.915552	0.806236	1.03282	0.0805
	a_2clacephen_ln7	-0.0867533	-0.212192	0.0431236	0.916903	0.80881	1.04407	0.0894
	a_2np_ln2	-0.0465868	-0.144495	0.0556522	0.954482	0.865459	1.05723	0.1815
	a_2np_ln3	0.0112466	-0.0938433	0.115362	1.01131	0.910425	1.12228	0.4223
	a_2np_ln4	0.0141221	-0.0865286	0.124075	1.01422	0.917109	1.1321	0.3958
	a_2np_ln5	0.00896136	-0.0992668	0.109598	1.009	0.905501	1.11583	0.4385
	a_2np_ln6	0.0453355	-0.066662	0.153678	1.04638	0.935511	1.16611	0.2055
	a_2np_ln7	0.0427483	-0.0746816	0.152099	1.04368	0.928039	1.16428	0.2304
	a_pnp_ln2	0.0633773	-0.0331762	0.164211	1.06543	0.967368	1.17846	0.1051
	a_pnp_ln3	0.08586	-0.024305	0.188888	1.08965	0.975988	1.20791	0.0577
	a_pnp_ln4	0.0577135	-0.0554651	0.167658	1.05941	0.946045	1.18253	0.1559
	a_pnp_ln5	0.0335157	-0.0848181	0.154676	1.03408	0.918679	1.16728	0.2934
	a_pnp_ln6	0.0284444	-0.101721	0.157803	1.02885	0.903281	1.17094	0.3372
	a_pnp_ln7	0.0759758	-0.0710744	0.213626	1.07894	0.931393	1.23816	0.1497
	a_ch3cn_ln2	0.0336122	-0.0632698	0.128114	1.03418	0.93869	1.13668	0.246
	a_ch3cn_ln3	0.0258565	-0.0861303	0.128291	1.02619	0.917475	1.13688	0.3189
	a_ch3cn_ln4	0.0703804	-0.0354701	0.183917	1.07292	0.965152	1.20192	0.1032
	a_ch3cn_ln5	0.0558115	-0.0541653	0.168953	1.0574	0.947275	1.18406	0.1651
	a_ch3cn_ln6	0.0569196	-0.054821	0.166255	1.05857	0.946655	1.18087	0.1601
	a_ch3cn_ln7	0.0941444	-0.0250606	0.208034	1.09872	0.975251	1.23125	0.0566
	a_acetophenone_ln2	0.0243733	-0.0707844	0.118261	1.02467	0.931663	1.12554	0.3038
	a_acetophenone_ln3	0.0703278	-0.0329533	0.173619	1.07286	0.967584	1.1896	0.0957
	a_acetophenone_ln4	0.0912944	-0.0151873	0.196878	1.09559	0.984927	1.2176	0.0493
	a_acetophenone_ln5	0.0778523	-0.0336454	0.182277	1.08096	0.966914	1.19995	0.0813
	a_acetophenone_ln6	0.0695197	-0.0375278	0.184509	1.07199	0.963168	1.20263	0.1113
	a_acetophenone_ln7	0.0717166	-0.0370314	0.184876	1.07435	0.963646	1.20307	0.1053
	a_acrolein_ln2	0.0816531	-0.00550427	0.167378	1.08508	0.994511	1.1822	0.0335
	a_acrolein_ln3	0.0693785	-0.0350049	0.170812	1.07184	0.965601	1.18627	0.0935
	a_acrolein_ln4	0.0680426	-0.0430491	0.179082	1.07041	0.957864	1.19612	0.1167
	a_acrolein_ln5	0.100729	-0.0186937	0.218684	1.10598	0.98148	1.24444	0.0491
	a_acrolein_ln6	0.125233	-0.00322805	0.24799	1.13341	0.996777	1.28145	0.0253
	a_acrolein_ln7	0.117589	-0.0240585	0.25347	1.12478	0.976229	1.28849	0.051
	a_acrylic_acid_ln2	-0.0314533	-0.110162	0.0483928	0.969036	0.895689	1.04958	0.2204
	a_acrylic_acid_ln3	-0.0411509	-0.125606	0.0403552	0.959684	0.881962	1.04118	0.1681
	a_acrylic_acid_ln4	-0.0359131	-0.121799	0.049328	0.964724	0.885327	1.05056	0.2039
	a_acrylic_acid_ln5	-0.0418384	-0.125858	0.0467648	0.959025	0.88174	1.04788	0.1688
	a_acrylic_acid_ln6	-0.0786627	-0.16579	0.0102881	0.924352	0.847224	1.01034	0.0408
	a_acrylic_acid_ln7	-0.0918003	-0.180965	-0.00148653	0.912287	0.834465	0.998515	0.0225
	a_c3h3n_ln2	-0.0115218	-0.0835866	0.059912	0.988544	0.919811	1.06174	0.378
	a_c3h3n_ln3	0.033143	-0.0519834	0.120665	1.0337	0.949345	1.12825	0.2236
	a_c3h3n_ln4	0.100258	0.00227575	0.19492	1.10546	1.00228	1.21521	0.0205
	a_c3h3n_ln5	0.124484	0.02326	0.227597	1.13256	1.02353	1.25558	0.0097
	a_c3h3n_ln6	0.14461	0.03104	0.254631	1.15559	1.03153	1.28999	0.0066
	a_c3h3n_ln7	0.112913	1.36628e-05	0.23196	1.11953	1.00001	1.26107	0.0283
	a_sb_ln2	0.00315131	-0.0542346	0.0613429	1.00316	0.94721	1.06326	0.458
	a_sb_ln3	0.0311106	-0.0320132	0.095939	1.0316	0.968494	1.10069	0.1698
	a_sb_ln4	0.0204763	-0.0492252	0.0860327	1.02069	0.951967	1.08984	0.2746
	a_sb_ln5	0.0339637	-0.0332828	0.1045	1.03455	0.967265	1.11016	0.1664
	a_sb_ln6	0.0701181	0.00128637	0.143231	1.07263	1.00129	1.154	0.0272
	a_sb_ln7	0.0870451	0.0118889	0.157918	1.09095	1.01196	1.17107	0.0083
	a_benzidine_ln2	-0.0906714	-0.177221	-0.00710009	0.913318	0.837595	0.992925	0.0188
	a_benzidine_ln3	-0.0772846	-0.165193	0.00824908	0.925626	0.84773	1.00828	0.0403
	a_benzidine_ln4	-0.122212	-0.198515	-0.0461265	0.884961	0.819948	0.954921	0.0006
	a_benzidine_ln5	-0.1337	-0.212848	-0.0569204	0.874852	0.808279	0.944669	0.0003
	a_benzidine_ln6	-0.137302	-0.220727	-0.0493389	0.871707	0.801935	0.951858	0.0008
	a_benzidine_ln7	-0.119837	-0.213662	-0.0272422	0.887065	0.807621	0.973126	0.0066
	a_benzyl_cl_ln2	0.00171599	-0.0846958	0.0868237	1.00172	0.918792	1.0907	0.4774
	a_benzyl_cl_ln3	0.0432313	-0.0553903	0.139217	1.04418	0.946116	1.14937	0.1938
	a_benzyl_cl_ln4	0.0226286	-0.0819318	0.130957	1.02289	0.921335	1.13992	0.3369
	a_benzyl_cl_ln5	0.0213369	-0.0971429	0.132047	1.02157	0.907426	1.14116	0.3578
	a_benzyl_cl_ln6	-0.00776167	-0.121109	0.112796	0.992268	0.885937	1.1194	0.4439
	a_benzyl_cl_ln7	0.00223425	-0.11536	0.126948	1.00224	0.891045	1.13536	0.4884
	a_be_ln2	-0.0271563	-0.0962152	0.0445809	0.973209	0.908269	1.04559	0.2224
	a_be_ln3	0.0117418	-0.0675381	0.0932067	1.01181	0.934692	1.09769	0.39
	a_be_ln4	0.0220305	-0.0634823	0.103354	1.02227	0.938491	1.10888	0.2973
	a_be_ln5	-0.024585	-0.11363	0.0616725	0.975715	0.892588	1.06361	0.2911
	a_be_ln6	0.00638243	-0.0854166	0.0985419	1.0064	0.91813	1.10356	0.4431
	a_be_ln7	-6.13413e-05	-0.104141	0.0922702	0.999939	0.901098	1.09666	0.5033
	a_biphenyl_ln2	0.0276646	-0.0639026	0.12081	1.02805	0.938096	1.12841	0.2815
	a_biphenyl_ln3	-0.0318799	-0.132617	0.071046	0.968623	0.875801	1.07363	0.269
	a_biphenyl_ln4	-0.0117423	-0.114184	0.0997273	0.988326	0.892093	1.10487	0.4104
	a_biphenyl_ln5	-0.00435727	-0.105253	0.110688	0.995652	0.900097	1.11705	0.4622
	a_biphenyl_ln6	0.008898	-0.101305	0.1181	1.00894	0.903657	1.12536	0.4384
	a_biphenyl_ln7	-0.0535501	-0.163278	0.0607731	0.947858	0.849355	1.06266	0.1781
	a_dehp_ln2	0.0417283	-0.0228632	0.105926	1.04261	0.977396	1.11174	0.101
	a_dehp_ln3	0.0408684	-0.0342096	0.115756	1.04171	0.966369	1.12272	0.1447
	a_dehp_ln4	0.0583479	-0.0300816	0.139634	1.06008	0.970366	1.14985	0.0846
	a_dehp_ln5	0.0605393	-0.0274772	0.151123	1.06241	0.972897	1.16314	0.0891
	a_dehp_ln6	0.0417702	-0.0453731	0.133634	1.04265	0.955641	1.14297	0.1844
	a_dehp_ln7	0.0766977	-0.0150818	0.170227	1.07972	0.985031	1.18557	0.0541
	a_bromoform_ln2	0.205267	0.0995884	0.31177	1.22785	1.10472	1.36584	0.0003
	a_bromoform_ln3	0.150997	0.051775	0.247789	1.16299	1.05314	1.28119	0.0014
	a_bromoform_ln4	0.118132	0.0131155	0.223163	1.12539	1.0132	1.25002	0.0139
	a_bromoform_ln5	0.122273	0.00460562	0.234859	1.13006	1.00462	1.26473	0.0173
	a_bromoform_ln6	0.121122	0.00707825	0.238171	1.12876	1.0071	1.26893	0.0197
	a_bromoform_ln7	0.117063	0.00422757	0.235063	1.12419	1.00424	1.26499	0.0233
	a_cd_ln2	0.0336242	-0.0500498	0.118595	1.0342	0.951182	1.12591	0.2176
	a_cd_ln3	0.0554485	-0.0434608	0.146554	1.05701	0.95747	1.15784	0.133
	a_cd_ln4	0.0261426	-0.0695317	0.132424	1.02649	0.932831	1.14159	0.3106
	a_cd_ln5	0.0406687	-0.0602777	0.145297	1.04151	0.941503	1.15638	0.2216
	a_cd_ln6	0.0376922	-0.066911	0.143066	1.03841	0.935278	1.15381	0.2471
	a_cd_ln7	0.036175	-0.0756176	0.14564	1.03684	0.927171	1.15678	0.2614
	a_cs2_ln2	0.0284585	-0.0552	0.11271	1.02887	0.946296	1.11931	0.2536
	a_cs2_ln3	-0.00149815	-0.0975648	0.0922311	0.998503	0.907044	1.09662	0.4873
	a_cs2_ln4	0.0225516	-0.0719111	0.127965	1.02281	0.930614	1.13651	0.3317
	a_cs2_ln5	0.0556995	-0.0479334	0.16175	1.05728	0.953197	1.17557	0.1528
	a_cs2_ln6	0.0587973	-0.0449952	0.171197	1.06056	0.956002	1.18672	0.1464
	a_cs2_ln7	0.0383768	-0.0667247	0.14802	1.03912	0.935453	1.15954	0.2409
	a_ccl42	0.0499589	-0.0374533	0.136731	1.05123	0.963239	1.14652	0.1314
	a_ccl43	-0.00651197	-0.0887494	0.0808067	0.993509	0.915075	1.08416	0.439
	a_ccl44	-0.0103193	-0.0943289	0.0698731	0.989734	0.909983	1.07237	0.4075
	a_ccl45	0.00165387	-0.0791265	0.0785066	1.00166	0.923923	1.08167	0.4825
	a_ccl46	0.0150049	-0.0650566	0.090758	1.01512	0.937014	1.095	0.3502
	a_ccl47	0.00129406	-0.0756859	0.0854719	1.00129	0.927107	1.08923	0.4871
	a_cs_ln2	-0.0138394	-0.0721939	0.0446863	0.986256	0.93035	1.0457	0.3256
	a_cs_ln3	-0.011446	-0.0757399	0.0535355	0.988619	0.927057	1.05499	0.3654
	a_cs_ln4	0.0267704	-0.0403799	0.0941875	1.02713	0.960424	1.09877	0.2176
	a_cs_ln5	0.0125514	-0.0547639	0.0826073	1.01263	0.946709	1.08612	0.3599
	a_cs_ln6	0.0114447	-0.0590683	0.0830781	1.01151	0.942642	1.08663	0.3761
	a_cs_ln7	0.0286986	-0.0413985	0.096429	1.02911	0.959447	1.10123	0.2139
	a_cl_ln2	0.045299	-0.0113835	0.104144	1.04634	0.988681	1.10976	0.0627
	a_cl_ln3	0.0278632	-0.0343011	0.0910289	1.02825	0.966281	1.0953	0.1931
	a_cl_ln4	0.0101396	-0.0541251	0.0745448	1.01019	0.947314	1.07739	0.3751
	a_cl_ln5	0.0186497	-0.0472268	0.0841282	1.01882	0.953871	1.08777	0.2835
	a_cl_ln6	0.00725985	-0.06438	0.072068	1.00729	0.937649	1.07473	0.4161
	a_cl_ln7	0.0344775	-0.0404553	0.106402	1.03508	0.960352	1.11227	0.1769
	a_c6h5cl_ln2	0.0364105	-0.0437747	0.11834	1.03708	0.95717	1.12563	0.194
	a_c6h5cl_ln3	0.0542608	-0.0320994	0.145786	1.05576	0.96841	1.15695	0.1232
	a_c6h5cl_ln4	0.0470636	-0.048827	0.139991	1.04819	0.952346	1.15026	0.1706
	a_c6h5cl_ln5	0.0591718	-0.0323219	0.15645	1.06096	0.968195	1.16935	0.1112
	a_c6h5cl_ln6	0.0288142	-0.0779782	0.132561	1.02923	0.924985	1.14175	0.299
	a_c6h5cl_ln7	-0.0251662	-0.152935	0.100176	0.975148	0.858186	1.10537	0.3508
	a_chloroform_ln2	0.0418906	-0.0459608	0.125611	1.04278	0.955079	1.13384	0.1751
	a_chloroform_ln3	0.0565134	-0.0409719	0.152111	1.05814	0.959856	1.16429	0.1315
	a_chloroform_ln4	0.0674563	-0.0315237	0.172609	1.06978	0.968968	1.1884	0.1021
	a_chloroform_ln5	0.0185691	-0.0896462	0.121616	1.01874	0.914255	1.12932	0.3677
	a_chloroform_ln6	0.0143768	-0.101332	0.124014	1.01448	0.903633	1.13203	0.3998
	a_chloroform_ln7	-0.00787187	-0.121426	0.113383	0.992159	0.885657	1.12006	0.4491
	a_chloroprene_ln2	0.0138328	-0.115909	0.138151	1.01393	0.890556	1.14815	0.4159
	a_chloroprene_ln3	0.0613755	-0.0780186	0.200334	1.0633	0.924947	1.22181	0.1969
	a_chloroprene_ln4	0.048511	-0.0952646	0.194785	1.04971	0.909132	1.21505	0.2589
	a_chloroprene_ln5	0.0171046	-0.134217	0.166938	1.01725	0.8744	1.18168	0.4093
	a_chloroprene_ln6	0.0587123	-0.0948223	0.212765	1.06047	0.909535	1.23709	0.2242
	a_chloroprene_ln7	0.071998	-0.081275	0.224614	1.07465	0.92194	1.25184	0.1825
	a_cr_ln2	0.0347847	-0.0546007	0.121213	1.0354	0.946863	1.12886	0.2121
	a_cr_ln3	0.0312621	-0.0640254	0.129997	1.03176	0.937981	1.13882	0.263
	a_cr_ln4	0.0474966	-0.0500144	0.146484	1.04864	0.951216	1.15776	0.1731
	a_cr_ln5	0.0129462	-0.0865691	0.114895	1.01303	0.917072	1.12176	0.3922
	a_cr_ln6	0.0225973	-0.0859732	0.122218	1.02285	0.917619	1.13	0.3335
	a_cr_ln7	0.031282	-0.0823683	0.135889	1.03178	0.920933	1.14555	0.2905
	a_cresol_ln2	-0.0317849	-0.110453	0.0441033	0.968715	0.895428	1.04509	0.2143
	a_cresol_ln3	-0.0171388	-0.109608	0.0761357	0.983007	0.896186	1.07911	0.3644
	a_cresol_ln4	-0.0253332	-0.124637	0.075974	0.974985	0.882817	1.07893	0.3165
	a_cresol_ln5	-0.0221777	-0.129285	0.0831093	0.978066	0.878723	1.08666	0.344
	a_cresol_ln6	0.00477906	-0.107892	0.112843	1.00479	0.897725	1.11946	0.4661
	a_cresol_ln7	-0.00530945	-0.12256	0.10972	0.994705	0.884653	1.11597	0.4689
	a_cumene_ln2	0.0430124	-0.0618137	0.143346	1.04395	0.940058	1.15413	0.2015
	a_cumene_ln3	0.0768822	-0.0369225	0.19608	1.07991	0.963751	1.21662	0.096
	a_cumene_ln4	0.075006	-0.0453723	0.200108	1.07789	0.955642	1.22153	0.1101
	a_cumene_ln5	0.110775	-0.0125297	0.236346	1.11714	0.987549	1.26661	0.0411
	a_cumene_ln6	0.12282	-0.00202351	0.249688	1.13068	0.997979	1.28362	0.0283
	a_cumene_ln7	0.098874	-0.0270939	0.233362	1.10393	0.97327	1.26284	0.071
	a_cn_ln2	0.0936278	-0.00998691	0.209509	1.09815	0.990063	1.23307	0.047
	a_cn_ln3	0.146394	0.0212901	0.277877	1.15765	1.02152	1.32032	0.0141
	a_cn_ln4	0.180496	0.0389885	0.316015	1.19781	1.03976	1.37165	0.006
	a_cn_ln5	0.197844	0.0471615	0.339523	1.21877	1.04829	1.40428	0.0043
	a_cn_ln6	0.214178	0.0609864	0.363652	1.23884	1.06288	1.43857	0.0032
	a_cn_ln7	0.206313	0.0437511	0.372875	1.22914	1.04472	1.4519	0.0068
	a_dbp_ln2	-0.0161196	-0.108293	0.0818471	0.98401	0.897365	1.08529	0.3749
	a_dbp_ln3	-0.00443403	-0.113631	0.0963101	0.995576	0.892587	1.1011	0.473
	a_dbp_ln4	-0.0154239	-0.122905	0.0905338	0.984694	0.884347	1.09476	0.3975
	a_dbp_ln5	-0.0311437	-0.139283	0.0805936	0.969336	0.869982	1.08393	0.2915
	a_dbp_ln6	-3.90842e-05	-0.110355	0.112544	0.999961	0.895516	1.11912	0.5053
	a_dbp_ln7	-0.0111641	-0.124601	0.103126	0.988898	0.882849	1.10863	0.4256
	a_diesel_ln2	-0.0688652	-0.145007	0.0126062	0.933453	0.865016	1.01269	0.0429
	a_diesel_ln3	-0.106802	-0.196058	-0.0184766	0.898703	0.821965	0.981693	0.0092
	a_diesel_ln4	-0.119804	-0.215393	-0.0249306	0.887094	0.806224	0.975378	0.0064
	a_diesel_ln5	-0.116261	-0.222327	-0.0135991	0.890243	0.800654	0.986493	0.0145
	a_diesel_ln6	-0.111768	-0.226313	-0.00162092	0.894252	0.797468	0.99838	0.025
	a_diesel_ln7	-0.0973969	-0.221469	0.0290337	0.907196	0.801341	1.02946	0.0612
	a_dmf_ln2	-0.0350161	-0.129738	0.0543517	0.96559	0.878326	1.05586	0.223
	a_dmf_ln3	-0.0770837	-0.190913	0.0334323	0.925812	0.826204	1.034	0.0873
	a_dmf_ln4	-0.113581	-0.239467	0.0120631	0.892632	0.787047	1.01214	0.0387
	a_dmf_ln5	-0.136308	-0.271471	0.0050159	0.872574	0.762257	1.00503	0.0263
	a_dmf_ln6	-0.123186	-0.269673	0.0243281	0.884099	0.76363	1.02463	0.0493
	a_dmf_ln7	-0.166561	-0.323315	-0.00763417	0.846571	0.723746	0.992395	0.0189
	a_me2_phthalate_ln2	0.0042864	-0.102584	0.124198	1.0043	0.902503	1.13224	0.4738
	a_me2_phthalate_ln3	0.00494658	-0.110051	0.124788	1.00496	0.895789	1.13291	0.4705
	a_me2_phthalate_ln4	0.00217184	-0.113107	0.121376	1.00217	0.893056	1.12905	0.4903
	a_me2_phthalate_ln5	0.0199561	-0.0962489	0.136688	1.02016	0.908238	1.14647	0.3732
	a_me2_phthalate_ln6	0.0064288	-0.112471	0.122053	1.00645	0.893623	1.12981	0.4606
	a_me2_phthalate_ln7	0.0132548	-0.105008	0.128846	1.01334	0.900317	1.13752	0.4163
	a_me2so4_ln2	0.0576214	-0.0328609	0.145457	1.05931	0.967673	1.15657	0.1033
	a_me2so4_ln3	-0.00852768	-0.102702	0.093762	0.991509	0.902396	1.0983	0.4363
	a_me2so4_ln4	-0.00690795	-0.115589	0.100374	0.993116	0.890841	1.10558	0.4531
	a_me2so4_ln5	-0.0280333	-0.145527	0.0824166	0.972356	0.864567	1.08591	0.3143
	a_me2so4_ln6	-0.027262	-0.154169	0.0903181	0.973106	0.857127	1.09452	0.3306
	a_me2so4_ln7	-0.0416903	-0.168155	0.0908268	0.959167	0.845223	1.09508	0.2673
	a_ech_ln2	0.0759042	-0.0213593	0.171387	1.07886	0.978867	1.18695	0.0642
	a_ech_ln3	0.0866774	-0.0158494	0.184064	1.09054	0.984276	1.20209	0.0455
	a_ech_ln4	0.0906305	-0.0126164	0.194436	1.09486	0.987463	1.21463	0.0442
	a_ech_ln5	0.0856332	-0.0211189	0.190358	1.08941	0.979103	1.20968	0.0597
	a_ech_ln6	0.102199	-0.00312463	0.211368	1.1076	0.99688	1.23537	0.0321
	a_ech_ln7	0.109813	-0.00371558	0.212953	1.11607	0.996291	1.23733	0.0258
	a_etacrylate_ln2	0.00671561	-0.111842	0.12175	1.00674	0.894185	1.12947	0.4562
	a_etacrylate_ln3	-0.00416777	-0.126828	0.131846	0.995841	0.880885	1.14093	0.4764
	a_etacrylate_ln4	-0.0230785	-0.156277	0.107788	0.977186	0.855323	1.11381	0.3658
	a_etacrylate_ln5	-0.0289189	-0.16112	0.102608	0.971495	0.85119	1.10806	0.337
	a_etacrylate_ln6	-0.0169362	-0.150249	0.114181	0.983206	0.860494	1.12095	0.4
	a_etacrylate_ln7	-0.026819	-0.157939	0.106785	0.973537	0.853902	1.1127	0.3447
	a_etcl_ln2	0.00572749	-0.0518591	0.0650937	1.00574	0.949463	1.06726	0.4215
	a_etcl_ln3	-0.0306126	-0.107817	0.0426081	0.969851	0.897792	1.04353	0.2158
	a_etcl_ln4	-0.00546105	-0.0872462	0.080977	0.994554	0.916451	1.08435	0.4494
	a_etcl_ln5	0.0246421	-0.0633515	0.118187	1.02495	0.938613	1.12545	0.2998
	a_etcl_ln6	-0.00237852	-0.0954306	0.0964972	0.997624	0.908981	1.10131	0.4833
	a_etcl_ln7	0.00492171	-0.100849	0.101765	1.00493	0.90407	1.10712	0.4634
	a_edb_ln2	-0.014316	-0.0845839	0.0597893	0.985786	0.918895	1.06161	0.3463
	a_edb_ln3	0.0146096	-0.0673978	0.0924096	1.01472	0.934823	1.09681	0.3599
	a_edb_ln4	0.0521062	-0.0340059	0.136615	1.05349	0.966566	1.14639	0.1142
	a_edb_ln5	0.109504	-0.0132679	0.231801	1.11572	0.98682	1.26087	0.0413
	a_edb_ln6	0.0908798	-0.0654333	0.245284	1.09514	0.936662	1.27798	0.1282
	a_edb_ln7	0.0530497	-0.141901	0.232766	1.05448	0.867707	1.26209	0.288
	a_edc_ln2	-0.0353205	-0.136403	0.06091	0.965296	0.872491	1.0628	0.2416
	a_edc_ln3	-0.0156491	-0.132279	0.104765	0.984473	0.876097	1.11045	0.4046
	a_edc_ln4	0.0153366	-0.118701	0.149617	1.01545	0.888073	1.16139	0.4085
	a_edc_ln5	0.0316527	-0.115013	0.176243	1.03216	0.891354	1.19273	0.3411
	a_edc_ln6	0.0345509	-0.127914	0.188768	1.03515	0.879929	1.20776	0.332
	a_edc_ln7	0.0133068	-0.15766	0.19112	1.0134	0.85414	1.2106	0.4387
	a_egly_ln2	-0.0524577	-0.162937	0.0628678	0.948894	0.849645	1.06489	0.183
	a_egly_ln3	-0.0326172	-0.160685	0.0959125	0.967909	0.85156	1.10066	0.3105
	a_egly_ln4	-0.0404043	-0.165711	0.101333	0.960401	0.847291	1.10665	0.281
	a_egly_ln5	-0.00605399	-0.140263	0.134795	0.993964	0.86913	1.1443	0.4615
	a_egly_ln6	-0.000644482	-0.14437	0.141519	0.999356	0.865567	1.15202	0.4942
	a_egly_ln7	-0.00294782	-0.147038	0.15087	0.997057	0.863261	1.16285	0.4818
	a_eox_ln2	0.0150835	-0.0586572	0.0893918	1.0152	0.94303	1.09351	0.3454
	a_eox_ln3	0.0340143	-0.0574332	0.120658	1.0346	0.944185	1.12824	0.2282
	a_eox_ln4	0.0661607	-0.0303678	0.164159	1.0684	0.970089	1.1784	0.0936
	a_eox_ln5	0.0678361	-0.0290751	0.170373	1.07019	0.971343	1.18575	0.0935
	a_eox_ln6	0.0597082	-0.0483326	0.162269	1.06153	0.952817	1.17618	0.1344
	a_eox_ln7	0.0829381	-0.0288315	0.199042	1.08647	0.97158	1.22023	0.0746
	a_edcl2_ln2	-0.017314	-0.0763801	0.0410029	0.982835	0.926464	1.04186	0.2821
	a_edcl2_ln3	0.0195807	-0.0467606	0.0841296	1.01977	0.954316	1.08777	0.2804
	a_edcl2_ln4	0.0391508	-0.0255337	0.109661	1.03993	0.974789	1.1159	0.1295
	a_edcl2_ln5	0.0373355	-0.0333676	0.107423	1.03804	0.967183	1.11341	0.1491
	a_edcl2_ln6	0.0177836	-0.0565638	0.0934334	1.01794	0.945006	1.09794	0.3226
	a_edcl2_ln7	0.046478	-0.0346939	0.130346	1.04758	0.965901	1.13922	0.1373
	a_glycol_ethers_ln2	0.0430398	-0.017188	0.108709	1.04398	0.982959	1.11484	0.0897
	a_glycol_ethers_ln3	0.0567441	-0.0130488	0.119958	1.05838	0.987036	1.12745	0.0491
	a_glycol_ethers_ln4	0.0405259	-0.0283034	0.109639	1.04136	0.972093	1.11587	0.1287
	a_glycol_ethers_ln5	0.038905	-0.0330564	0.107099	1.03967	0.967484	1.11304	0.1415
	a_glycol_ethers_ln6	0.0480647	-0.0226173	0.11985	1.04924	0.977637	1.12733	0.0982
	a_glycol_ethers_ln7	0.0288869	-0.0495494	0.102856	1.02931	0.951658	1.10833	0.2265
	a_hcb_ln2	0.019088	-0.0455793	0.0909643	1.01927	0.955444	1.09523	0.2944
	a_hcb_ln3	-0.026917	-0.103751	0.0562016	0.973442	0.90145	1.05781	0.2585
	a_hcb_ln4	-0.0495868	-0.133585	0.0366794	0.951623	0.874953	1.03736	0.1295
	a_hcb_ln5	-0.0267869	-0.112505	0.0650803	0.973569	0.893593	1.06724	0.2765
	a_hcb_ln6	-0.0341126	-0.124946	0.0590876	0.966463	0.882545	1.06087	0.2334
	a_hcb_ln7	-0.0164467	-0.109569	0.0744637	0.983688	0.89622	1.07731	0.362
	a_hcbd_ln2	-0.0435015	-0.193983	0.0951543	0.957431	0.823672	1.09983	0.275
	a_hcbd_ln3	-0.145574	-0.298426	-0.0078875	0.864526	0.741985	0.992144	0.026
	a_hcbd_ln4	-0.208835	-0.351297	-0.0549547	0.811529	0.703775	0.946528	0.0038
	a_hcbd_ln5	-0.117959	-0.267733	0.0251403	0.888732	0.765112	1.02546	0.057
	a_hcbd_ln6	-0.114321	-0.258279	0.0320476	0.891972	0.77238	1.03257	0.0618
	a_hcbd_ln7	-0.187527	-0.323531	-0.0457042	0.829007	0.723589	0.955324	0.0051
	a_hccpd_ln2	0.0384132	-0.0992988	0.185372	1.03916	0.905472	1.20367	0.301
	a_hccpd_ln3	0.15166	0.000620245	0.300274	1.16376	1.00062	1.35023	0.0234
	a_hccpd_ln4	0.179476	0.03825	0.345192	1.19659	1.03899	1.41226	0.0126
	a_hccpd_ln5	0.0988592	-0.0457962	0.249296	1.10391	0.955237	1.28312	0.0928
	a_hccpd_ln6	0.0808821	-0.0663014	0.231051	1.08424	0.935849	1.25992	0.1418
	a_hccpd_ln7	0.0534752	-0.0826877	0.197917	1.05493	0.920639	1.21886	0.2263
	a_hexane_ln2	-0.0034324	-0.104172	0.0976142	0.996573	0.90107	1.10254	0.4738
	a_hexane_ln3	0.0117184	-0.10664	0.124159	1.01179	0.898849	1.1322	0.4167
	a_hexane_ln4	0.00148087	-0.115087	0.124855	1.00148	0.891289	1.13298	0.4882
	a_hexane_ln5	0.0152811	-0.106645	0.143359	1.0154	0.898845	1.15414	0.4035
	a_hexane_ln6	0.0151411	-0.114648	0.140783	1.01526	0.89168	1.15118	0.4013
	a_hexane_ln7	0.0312537	-0.100922	0.171386	1.03175	0.904003	1.18695	0.3229
	a_n2h2_ln2	0.0274573	-0.0484412	0.104415	1.02784	0.952713	1.11006	0.2343
	a_n2h2_ln3	0.0324217	-0.0479641	0.110954	1.03295	0.953168	1.11734	0.2089
	a_n2h2_ln4	0.0279094	-0.0507319	0.106863	1.0283	0.950533	1.11278	0.243
	a_n2h2_ln5	0.0332358	-0.0455187	0.116629	1.03379	0.955502	1.1237	0.2083
	a_n2h2_ln6	0.0522317	-0.0313258	0.135653	1.05362	0.96916	1.14528	0.1127
	a_n2h2_ln7	0.0810406	-0.00419199	0.172168	1.08441	0.995817	1.18788	0.0367
	a_hcl_ln2	-0.110794	-0.19614	-0.0241426	0.895123	0.821897	0.976146	0.0063
	a_hcl_ln3	-0.105063	-0.204359	-0.00963033	0.900268	0.815169	0.990416	0.019
	a_hcl_ln4	-0.121022	-0.2221	-0.0184462	0.886015	0.800836	0.981723	0.0122
	a_hcl_ln5	-0.0988674	-0.204767	0.00972279	0.905863	0.814838	1.00977	0.0365
	a_hcl_ln6	-0.0929334	-0.203983	0.0186081	0.911254	0.815476	1.01878	0.0506
	a_hcl_ln7	-0.110498	-0.237894	0.00765548	0.895388	0.788286	1.00768	0.0392
	a_isophorone_ln2	0.0284263	-0.0225972	0.0833499	1.02883	0.977656	1.08692	0.1446
	a_isophorone_ln3	0.00561935	-0.049243	0.0627142	1.00564	0.95195	1.06472	0.4186
	a_isophorone_ln4	0.0376566	-0.0158821	0.0966924	1.03837	0.984243	1.10152	0.0945
	a_isophorone_ln5	-0.00348587	-0.0625594	0.0562641	0.99652	0.939357	1.05788	0.4532
	a_isophorone_ln6	0.0103092	-0.0519178	0.0742962	1.01036	0.949407	1.07713	0.3761
	a_isophorone_ln7	0.0204427	-0.043944	0.0863806	1.02065	0.957008	1.09022	0.2718
	a_pb_ln2	-0.0316764	-0.0950189	0.0308486	0.96882	0.909356	1.03133	0.1652
	a_pb_ln3	0.0495412	-0.0178018	0.116948	1.05079	0.982356	1.12406	0.0746
	a_pb_ln4	0.0287527	-0.0407679	0.10148	1.02917	0.960052	1.10681	0.2154
	a_pb_ln5	0.042078	-0.0309711	0.114827	1.04298	0.969504	1.12168	0.128
	a_pb_ln6	0.0371695	-0.0377544	0.113263	1.03787	0.962949	1.11993	0.1703
	a_pb_ln7	0.0579098	-0.019862	0.1409	1.05962	0.980334	1.15131	0.0818
	a_mn_ln2	0.00795358	-0.0645833	0.0860316	1.00799	0.937458	1.08984	0.4181
	a_mn_ln3	-0.00379437	-0.0847858	0.0733565	0.996213	0.918709	1.07611	0.4566
	a_mn_ln4	-0.0140317	-0.0965663	0.0666719	0.986066	0.90795	1.06894	0.374
	a_mn_ln5	-0.012706	-0.099917	0.0710558	0.987374	0.904913	1.07364	0.3863
	a_mn_ln6	-0.0148613	-0.101458	0.0697176	0.985249	0.903519	1.07221	0.3698
	a_mn_ln7	-0.027699	-0.113374	0.0628475	0.972681	0.892817	1.06486	0.2724
	a_hg_ln2	-0.0949349	-0.181669	-0.00651697	0.909432	0.833878	0.993504	0.0188
	a_hg_ln3	-0.107626	-0.209748	-0.00703198	0.897963	0.810789	0.992993	0.0202
	a_hg_ln4	-0.0588984	-0.163676	0.0515206	0.942803	0.849017	1.05287	0.1395
	a_hg_ln5	-0.0721835	-0.183459	0.0381264	0.93036	0.832386	1.03886	0.0984
	a_hg_ln6	-0.0407871	-0.152455	0.075102	0.960033	0.858598	1.07799	0.2447
	a_hg_ln7	-0.0844385	-0.201359	0.0332266	0.919028	0.817619	1.03378	0.08
	a_meoh_ln2	-0.0708539	-0.161539	0.0229146	0.931598	0.850833	1.02318	0.0698
	a_meoh_ln3	-0.103988	-0.211298	-0.00269867	0.901236	0.809533	0.997305	0.025
	a_meoh_ln4	-0.113606	-0.222771	0.00117157	0.892609	0.800298	1.00117	0.0235
	a_meoh_ln5	-0.141261	-0.256267	-0.0266071	0.868263	0.773935	0.973744	0.0085
	a_meoh_ln6	-0.122868	-0.24457	-0.00335933	0.88438	0.783042	0.996646	0.0225
	a_meoh_ln7	-0.110062	-0.237364	0.0235929	0.895778	0.788704	1.02387	0.048
	a_mibk_ln2	0.0450548	-0.0426579	0.132507	1.04609	0.958239	1.14169	0.158
	a_mibk_ln3	-0.00238721	-0.101567	0.093122	0.997616	0.903421	1.0976	0.4847
	a_mibk_ln4	-0.0196022	-0.124515	0.0883857	0.980589	0.882925	1.09241	0.3554
	a_mibk_ln5	-0.0270105	-0.144817	0.0808851	0.973351	0.86518	1.08425	0.3211
	a_mibk_ln6	-0.0355494	-0.151502	0.0851313	0.965075	0.859416	1.08886	0.2829
	a_mibk_ln7	-0.0538014	-0.185435	0.0653154	0.94762	0.830742	1.0675	0.1983
	a_mma_ln2	-0.0427117	-0.144884	0.0518241	0.958188	0.865123	1.05319	0.1945
	a_mma_ln3	-0.0602491	-0.160109	0.042102	0.94153	0.852051	1.043	0.1211
	a_mma_ln4	-0.0583361	-0.163948	0.04403	0.943333	0.848786	1.04501	0.1397
	a_mma_ln5	-0.0483476	-0.149791	0.0620267	0.952803	0.860888	1.06399	0.1886
	a_mma_ln6	-0.0590603	-0.163016	0.0486112	0.94265	0.849578	1.04981	0.1421
	a_mma_ln7	-0.0342839	-0.138844	0.0767106	0.966297	0.870363	1.07973	0.2664
	a_mecl_ln2	0.00109996	-0.0872279	0.0937868	1.0011	0.916468	1.09833	0.4931
	a_mecl_ln3	-0.0420314	-0.140768	0.0636837	0.95884	0.868691	1.06576	0.2088
	a_mecl_ln4	-0.0263538	-0.133461	0.0835557	0.97399	0.875061	1.08715	0.3123
	a_mecl_ln5	-0.0242179	-0.132974	0.0935479	0.976073	0.875488	1.09806	0.3386
	a_mecl_ln6	-0.0241376	-0.137901	0.0981468	0.976151	0.871185	1.10312	0.3399
	a_mecl_ln7	-0.0527197	-0.182983	0.0695139	0.948646	0.832782	1.07199	0.2077
	a_mehydrazine_ln2	-0.00300058	-0.055127	0.0488186	0.997004	0.946365	1.05003	0.4542
	a_mehydrazine_ln3	0.0104174	-0.0406021	0.0616148	1.01047	0.960211	1.06355	0.34
	a_mehydrazine_ln4	0.0178698	-0.0343777	0.0692157	1.01803	0.966207	1.07167	0.2533
	a_mehydrazine_ln5	0.0107194	-0.0422964	0.0609963	1.01078	0.958586	1.06289	0.3449
	a_mehydrazine_ln6	0.0269411	-0.0244463	0.0815354	1.02731	0.97585	1.08495	0.1621
	a_mehydrazine_ln7	0.0279588	-0.0265484	0.0839863	1.02835	0.973801	1.08761	0.1627
	a_mtbe_ln2	-0.0135069	-0.0864337	0.0616905	0.986584	0.917196	1.06363	0.3662
	a_mtbe_ln3	-0.00629194	-0.0910608	0.0774593	0.993728	0.912962	1.08054	0.443
	a_mtbe_ln4	-0.00256309	-0.0923587	0.089128	0.99744	0.911778	1.09322	0.4774
	a_mtbe_ln5	-0.0124469	-0.106844	0.08047	0.98763	0.898665	1.0838	0.3994
	a_mtbe_ln6	0.013259	-0.0843145	0.113668	1.01335	0.919142	1.12038	0.3917
	a_mtbe_ln7	0.00876127	-0.0989806	0.112973	1.0088	0.90576	1.1196	0.4335
	a_nitrobenzene_ln2	-0.0461602	-0.16288	0.0671592	0.954889	0.849694	1.06947	0.2196
	a_nitrobenzene_ln3	-0.0476148	-0.176201	0.0835684	0.953501	0.838449	1.08716	0.2348
	a_nitrobenzene_ln4	0.00382347	-0.127153	0.139498	1.00383	0.880599	1.1497	0.4794
	a_nitrobenzene_ln5	-0.049082	-0.178046	0.091843	0.952103	0.836904	1.09619	0.2372
	a_nitrobenzene_ln6	-0.0412784	-0.175382	0.0917081	0.959562	0.839136	1.09604	0.2748
	a_nitrobenzene_ln7	-0.0323854	-0.159294	0.100149	0.968133	0.852746	1.10534	0.3158
	a_dma_ln2	-0.0337456	-0.144834	0.0793851	0.966817	0.865166	1.08262	0.2754
	a_dma_ln3	-0.0113536	-0.143564	0.124543	0.988711	0.866266	1.13263	0.4367
	a_dma_ln4	-0.0162781	-0.15372	0.12623	0.983854	0.857512	1.13454	0.4092
	a_dma_ln5	-0.0269196	-0.16818	0.114103	0.97344	0.845202	1.12087	0.3493
	a_dma_ln6	0.0167758	-0.129399	0.158388	1.01692	0.878623	1.17162	0.4135
	a_dma_ln7	0.0466732	-0.0984522	0.200921	1.04778	0.906239	1.22253	0.274
	a_otoluidine_ln2	-0.0664871	-0.167993	0.042991	0.935675	0.84536	1.04393	0.1063
	a_otoluidine_ln3	-0.0906924	-0.206815	0.0214353	0.913299	0.81317	1.02167	0.0578
	a_otoluidine_ln4	-0.112807	-0.238725	-0.00056697	0.893323	0.787632	0.999433	0.0297
	a_otoluidine_ln5	-0.101806	-0.223162	0.0173902	0.903205	0.799985	1.01754	0.0486
	a_otoluidine_ln6	-0.0925515	-0.213133	0.0283099	0.911602	0.808049	1.02871	0.0649
	a_otoluidine_ln7	-0.0629212	-0.185296	0.0595979	0.939017	0.830858	1.06141	0.1536
	a_pahpom_ln2	-0.0373102	-0.123883	0.0599628	0.963377	0.883484	1.0618	0.2156
	a_pahpom_ln3	-0.069428	-0.172872	0.031985	0.932927	0.841246	1.0325	0.0959
	a_pahpom_ln4	-0.0439761	-0.153057	0.0659109	0.956977	0.858081	1.06813	0.2152
	a_pahpom_ln5	-0.0272457	-0.143175	0.0827876	0.973122	0.866602	1.08631	0.32
	a_pahpom_ln6	-0.0431872	-0.163627	0.0696027	0.957732	0.849059	1.07208	0.2326
	a_pahpom_ln7	-0.048381	-0.169655	0.0747297	0.952771	0.843956	1.07759	0.2201
	a_pcp_ln2	0.0547505	-0.0103794	0.116286	1.05628	0.989674	1.12332	0.0451
	a_pcp_ln3	-0.0205859	-0.104916	0.0580081	0.979625	0.9004	1.05972	0.3075
	a_pcp_ln4	0.0412062	-0.0514852	0.127287	1.04207	0.949818	1.13574	0.1784
	a_pcp_ln5	0.0461929	-0.0497446	0.137954	1.04728	0.951472	1.14792	0.1638
	a_pcp_ln6	0.044534	-0.0515408	0.143703	1.04554	0.949765	1.15454	0.1828
	a_pcp_ln7	0.00831214	-0.0899719	0.105998	1.00835	0.913957	1.11182	0.4326
	a_ph3_ln2	0.0167373	-0.0292032	0.0632863	1.01688	0.971219	1.06533	0.2405
	a_ph3_ln3	-0.00181994	-0.0508055	0.051239	0.998182	0.950463	1.05257	0.4727
	a_ph3_ln4	0.0127848	-0.0428754	0.0708626	1.01287	0.958031	1.07343	0.332
	a_ph3_ln5	-0.00501746	-0.0606711	0.0519571	0.994995	0.941133	1.05333	0.4336
	a_ph3_ln6	0.0396604	-0.0169847	0.102563	1.04046	0.983159	1.10801	0.0991
	a_ph3_ln7	0.03306	-0.0302038	0.0956649	1.03361	0.970248	1.10039	0.1499
	a_p_ln2	0.0237466	-0.0344436	0.0823253	1.02403	0.966143	1.08581	0.2114
	a_p_ln3	-0.00593734	-0.0526798	0.0438969	0.99408	0.948684	1.04487	0.404
	a_p_ln4	0.0324522	-0.0129265	0.080274	1.03298	0.987157	1.08358	0.0872
	a_p_ln5	0.0150996	-0.0324207	0.0601142	1.01521	0.968099	1.06196	0.2672
	a_p_ln6	0.0348259	-0.0144575	0.0818207	1.03544	0.985647	1.08526	0.0807
	a_p_ln7	0.0261943	-0.0243796	0.0750169	1.02654	0.975915	1.0779	0.15
	a_pcbs_ln2	0.0331167	-0.0328976	0.0963643	1.03367	0.967638	1.10116	0.1645
	a_pcbs_ln3	0.131654	0.0535547	0.208034	1.14071	1.05501	1.23125	0.0005
	a_pcbs_ln4	0.125882	0.0398523	0.210825	1.13415	1.04066	1.2347	0.0028
	a_pcbs_ln5	0.091916	-0.00668144	0.187807	1.09627	0.993341	1.2066	0.0306
	a_pcbs_ln6	0.0948169	-0.00245804	0.206543	1.09946	0.997545	1.22942	0.035
	a_pcbs_ln7	0.104673	-0.00491002	0.217175	1.11035	0.995102	1.24256	0.0338
	a_procl2_ln2	-0.050525	-0.137446	0.0360225	0.95073	0.871581	1.03668	0.1275
	a_procl2_ln3	-0.0505883	-0.169011	0.0640749	0.95067	0.844499	1.06617	0.1976
	a_procl2_ln4	-0.0864462	-0.229102	0.0447058	0.917185	0.795247	1.04572	0.1057
	a_procl2_ln5	-0.137048	-0.28322	0.0160616	0.871928	0.753354	1.01619	0.0374
	a_procl2_ln6	-0.071094	-0.231254	0.0985416	0.931374	0.793538	1.10356	0.1959
	a_procl2_ln7	-0.0499851	-0.232335	0.127327	0.951244	0.792681	1.13579	0.2922
	a_proo_ln2	-0.0482142	-0.144167	0.0486062	0.95293	0.865744	1.04981	0.1638
	a_proo_ln3	-0.0420294	-0.146445	0.0751596	0.958842	0.863773	1.07806	0.2283
	a_proo_ln4	-0.0499295	-0.16137	0.0735879	0.951296	0.850977	1.07636	0.2052
	a_proo_ln5	-0.0687785	-0.196638	0.049502	0.933533	0.821488	1.05075	0.142
	a_proo_ln6	-0.07405	-0.201603	0.0529694	0.928625	0.81742	1.0544	0.1274
	a_proo_ln7	-0.0304969	-0.165612	0.0974483	0.969963	0.847375	1.10235	0.3201
	a_quinoline_ln2	0.0188667	-0.0509061	0.0937335	1.01905	0.950368	1.09827	0.3042
	a_quinoline_ln3	-0.0180238	-0.094448	0.0571921	0.982138	0.909875	1.05886	0.3219
	a_quinoline_ln4	-0.0648938	-0.150025	0.0260252	0.937167	0.860687	1.02637	0.0711
	a_quinoline_ln5	-0.0676312	-0.164625	0.0271909	0.934605	0.848212	1.02756	0.0794
	a_quinoline_ln6	0.0160493	-0.0864846	0.118078	1.01618	0.91715	1.12533	0.3838
	a_quinoline_ln7	0.0628218	-0.0449817	0.176276	1.06484	0.956015	1.19277	0.1335
	a_se_ln2	0.021134	-0.0545443	0.0978065	1.02136	0.946917	1.10275	0.2995
	a_se_ln3	0.05659	-0.0319037	0.143392	1.05822	0.9686	1.15418	0.1043
	a_se_ln4	0.00156303	-0.0891455	0.0948229	1.00156	0.914712	1.09946	0.4883
	a_se_ln5	0.0303349	-0.0639535	0.128469	1.0308	0.938049	1.13709	0.2684
	a_se_ln6	0.0430083	-0.0548501	0.147881	1.04395	0.946627	1.15938	0.2034
	a_se_ln7	0.0340682	-0.0754172	0.144246	1.03466	0.927356	1.15517	0.2738
	a_stryene_ln2	0.0336935	-0.0557363	0.117959	1.03427	0.945788	1.1252	0.228
	a_stryene_ln3	-0.00272974	-0.0996068	0.0975109	0.997274	0.905193	1.10242	0.4817
	a_stryene_ln4	0.00602963	-0.0934785	0.112688	1.00605	0.910758	1.11928	0.456
	a_stryene_ln5	-0.00790899	-0.113545	0.0980805	0.992122	0.892664	1.10305	0.44
	a_stryene_ln6	-0.031451	-0.140395	0.073499	0.969038	0.869015	1.07627	0.2891
	a_stryene_ln7	-0.0330096	-0.140654	0.07759	0.967529	0.86879	1.08068	0.2833
	a_cl4c2_ln2	-0.0629349	-0.132876	0.00399462	0.939005	0.875574	1.004	0.0339
	a_cl4c2_ln3	-0.0895158	-0.164184	-0.0147006	0.914374	0.848586	0.985407	0.0099
	a_cl4c2_ln4	-0.0951977	-0.182749	-0.0102969	0.909193	0.832977	0.989756	0.0168
	a_cl4c2_ln5	-0.114922	-0.210036	-0.0210708	0.891435	0.810555	0.97915	0.0087
	a_cl4c2_ln6	-0.139941	-0.242468	-0.043627	0.869409	0.784689	0.957311	0.0027
	a_cl4c2_ln7	-0.116866	-0.227161	-0.00674642	0.889704	0.796793	0.993276	0.0188
	a_toluene_ln2	0.0462012	-0.0406711	0.132169	1.04729	0.960145	1.1413	0.1443
	a_toluene_ln3	0.0494875	-0.046368	0.143481	1.05073	0.954691	1.15428	0.1565
	a_toluene_ln4	0.0592152	-0.0572867	0.169558	1.061	0.944323	1.18478	0.1498
	a_toluene_ln5	0.0875439	-0.0380501	0.210543	1.09149	0.962665	1.23435	0.0843
	a_toluene_ln6	0.0900112	-0.0459956	0.22449	1.09419	0.955046	1.25168	0.0987
	a_toluene_ln7	0.107668	-0.0478267	0.254253	1.11368	0.953299	1.2895	0.0811
	a_c2hcl3_ln2	-0.00804643	-0.0842672	0.0678436	0.991986	0.919186	1.0702	0.4146
	a_c2hcl3_ln3	-0.0237987	-0.113205	0.0661164	0.976482	0.892967	1.06835	0.3033
	a_c2hcl3_ln4	-0.0630594	-0.161069	0.0357671	0.938888	0.851234	1.03641	0.1052
	a_c2hcl3_ln5	-0.125747	-0.233478	-0.0190194	0.881838	0.791775	0.98116	0.0127
	a_c2hcl3_ln6	-0.154976	-0.27181	-0.0412819	0.856435	0.761999	0.959559	0.0044
	a_c2hcl3_ln7	-0.114158	-0.246987	0.00774271	0.892117	0.781151	1.00777	0.0389
	a_etn_ln2	0.026086	-0.0592268	0.109354	1.02643	0.942493	1.11556	0.2684
	a_etn_ln3	-0.0198744	-0.125109	0.0709902	0.980322	0.8824	1.07357	0.3425
	a_etn_ln4	0.00319466	-0.0932707	0.108684	1.0032	0.910947	1.11481	0.4697
	a_etn_ln5	0.00236813	-0.0992306	0.105295	1.00237	0.905534	1.11104	0.4801
	a_etn_ln6	-0.0187759	-0.120467	0.0897897	0.981399	0.886506	1.09394	0.3667
	a_etn_ln7	0.0280434	-0.0743106	0.138948	1.02844	0.928383	1.14906	0.3016
	a_vyac_ln2	0.0993215	-0.0189618	0.209652	1.10442	0.981217	1.23325	0.046
	a_vyac_ln3	0.102648	-0.0215118	0.21832	1.1081	0.978718	1.24399	0.0487
	a_vyac_ln4	0.133455	0.00676621	0.254607	1.14277	1.00679	1.28995	0.0192
	a_vyac_ln5	0.109835	-0.0194655	0.231506	1.11609	0.980723	1.2605	0.0456
	a_vyac_ln6	0.108846	-0.0195661	0.232952	1.11499	0.980624	1.26232	0.0482
	a_vyac_ln7	0.136838	0.0128042	0.270686	1.14664	1.01289	1.31086	0.0216
	a_vycl_ln2	-0.0292166	-0.0970317	0.0427487	0.971206	0.907527	1.04368	0.2116
	a_vycl_ln3	-0.00144338	-0.0762736	0.0767989	0.998558	0.926563	1.07982	0.483
	a_vycl_ln4	-0.0379248	-0.118835	0.0430612	0.962785	0.887955	1.044	0.1854
	a_vycl_ln5	-0.0975326	-0.216025	0.0125801	0.907073	0.805715	1.01266	0.0475
	a_vycl_ln6	-0.0454494	-0.182499	0.0897568	0.955568	0.833185	1.09391	0.2541
	a_vycl_ln7	-0.0715506	-0.227296	0.0821847	0.930949	0.796685	1.08566	0.1813
	a_11dce_ln2	-0.113759	-0.202902	-0.0275396	0.892473	0.816358	0.972836	0.0059
	a_11dce_ln3	-0.0897544	-0.191555	0.00982244	0.914156	0.825674	1.00987	0.0414
	a_11dce_ln4	-0.0494999	-0.160496	0.0554364	0.951705	0.851721	1.057	0.1885
	a_11dce_ln5	-0.0980317	-0.211623	0.0143497	0.90662	0.80927	1.01445	0.0478
	a_11dce_ln6	-0.122466	-0.240818	-0.000747644	0.884736	0.785985	0.999253	0.0235
	a_11dce_ln7	-0.139419	-0.26585	-0.012386	0.869864	0.766554	0.98769	0.0154
	a_pm10_mean_ln2	-0.0606383	-0.116706	-0.00215652	0.941164	0.889847	0.997846	0.0201
	a_pm10_mean_ln3	-0.0399957	-0.101188	0.0221901	0.960794	0.903763	1.02244	0.1077
	a_pm10_mean_ln4	-0.0364647	-0.10602	0.0315362	0.964192	0.899407	1.03204	0.1547
	a_pm10_mean_ln5	-0.0398019	-0.1072	0.0310858	0.96098	0.898346	1.03157	0.1365
	a_pm10_mean_ln6	-0.0387365	-0.108063	0.0332188	0.962004	0.897571	1.03378	0.1471
	a_pm10_mean_ln7	-0.0276732	-0.102249	0.0465611	0.972706	0.902805	1.04766	0.2352
	a_pm25_mean2	-0.00378707	-0.0755	0.0681216	0.99622	0.92728	1.0705	0.4627
	a_pm25_mean3	-0.0428283	-0.13498	0.0485835	0.958076	0.873733	1.04978	0.179
	a_pm25_mean4	-0.0515329	-0.153314	0.0524599	0.949772	0.857861	1.05386	0.1667
	a_pm25_mean5	-0.0762144	-0.18906	0.0347752	0.926618	0.827737	1.03539	0.0931
	a_pm25_mean6	-0.0711879	-0.187611	0.0468883	0.931287	0.828937	1.048	0.1221
	a_pm25_mean7	-0.0645579	-0.190242	0.0533599	0.937482	0.826759	1.05481	0.1513
	a_so2_mean_ln2	0.0114675	-0.0457671	0.0734437	1.01153	0.955264	1.07621	0.3541
	a_so2_mean_ln3	0.031452	-0.0388237	0.103128	1.03195	0.96192	1.10863	0.1944
	a_so2_mean_ln4	0.0310154	-0.0509179	0.109118	1.0315	0.950357	1.11529	0.2162
	a_so2_mean_ln5	0.0419473	-0.0420922	0.120557	1.04284	0.958781	1.12813	0.1519
	a_so2_mean_ln6	0.028099	-0.0592118	0.118336	1.0285	0.942507	1.12562	0.2568
	a_so2_mean_ln7	0.0463268	-0.0459191	0.137863	1.04742	0.955119	1.14782	0.1577
	a_no2_mean_ln2	-0.0202406	-0.0726687	0.0376621	0.979963	0.929909	1.03838	0.2288
	a_no2_mean_ln3	-0.0208093	-0.0824951	0.043006	0.979406	0.920816	1.04394	0.2553
	a_no2_mean_ln4	-0.0219572	-0.0937918	0.0461584	0.978282	0.910472	1.04724	0.2689
	a_no2_mean_ln5	-0.0370848	-0.107728	0.0388239	0.963594	0.897872	1.03959	0.1595
	a_no2_mean_ln6	-0.0220472	-0.0950181	0.0580939	0.978194	0.909357	1.05981	0.2813
	a_no2_mean_ln7	0.0325033	-0.0457985	0.120965	1.03304	0.955234	1.12858	0.2147
	a_o3_mean_ln2	-0.0247643	-0.0851774	0.0366387	0.97554	0.918349	1.03732	0.2129
	a_o3_mean_ln3	-0.0652252	-0.136263	0.00514115	0.936856	0.872613	1.00515	0.0373
	a_o3_mean_ln4	-0.0225176	-0.0988866	0.0549376	0.977734	0.905845	1.05647	0.2829
	a_o3_mean_ln5	-0.0418813	-0.119952	0.0353554	0.958984	0.886963	1.03599	0.1451
	a_o3_mean_ln6	-0.0567977	-0.135771	0.0303912	0.944785	0.873043	1.03086	0.0895
	a_o3_mean_ln7	-0.00735234	-0.0933745	0.0810658	0.992675	0.910852	1.08444	0.4339
	a_co_mean_ln2	0.0226041	-0.0388804	0.085453	1.02286	0.961866	1.08921	0.2431
	a_co_mean_ln3	0.066569	-0.00737873	0.14132	1.06883	0.992648	1.15179	0.0382
	a_co_mean_ln4	0.0376879	-0.0375234	0.115889	1.03841	0.963172	1.12287	0.1646
	a_co_mean_ln5	0.0761378	-0.00578246	0.154304	1.07911	0.994234	1.16685	0.0296
	a_co_mean_ln6	0.0496148	-0.0433675	0.138901	1.05087	0.957559	1.14901	0.1409
	a_co_mean_ln7	0.0311949	-0.0690057	0.129792	1.03169	0.933321	1.13859	0.2717
	State Random Effects	post.mean	l-95% CI	u-95% CI	exp(mean)	exp(l-95% CI)	exp(u-95% CI)	pMCMC
	State.1	-0.0241833	-0.173131	0.124139	0.976107	0.841028	1.13217	0.3773
	State.4	-0.121577	-0.303091	0.0789275	0.885523	0.738532	1.08213	0.1089
	State.5	0.00444219	-0.15559	0.161021	1.00445	0.85591	1.17471	0.4808
	State.6	0.23744	0.0449511	0.432881	1.268	1.04598	1.54169	0.0081
	State.8	-0.287129	-0.476243	-0.0892236	0.750415	0.621112	0.914641	0.0019
	State.9	0.139294	-0.0653086	0.345738	1.14946	0.936778	1.41303	0.0922
	State.10	0.114009	-0.141213	0.390346	1.12076	0.868304	1.47749	0.2
	State.11	0.0237073	-0.288839	0.357857	1.02399	0.749132	1.43026	0.4387
	State.12	-0.0276246	-0.183484	0.130127	0.972754	0.832365	1.13897	0.3572
	State.13	0.139354	-0.0126292	0.290321	1.14953	0.98745	1.33686	0.0363
	State.16	0.199788	0.00233004	0.418493	1.22114	1.00233	1.51967	0.027
	State.17	0.0557407	-0.084665	0.205872	1.05732	0.91882	1.2286	0.2235
	State.18	0.0575739	-0.0801815	0.190403	1.05926	0.922949	1.20974	0.2018
	State.19	-0.406928	-0.538306	-0.277033	0.665692	0.583736	0.758029	1e-05
	State.20	0.0444154	-0.0986359	0.190852	1.04542	0.906073	1.21028	0.2681
	State.21	0.103899	-0.0311904	0.227786	1.10949	0.969291	1.25582	0.0587
	State.22	-0.296125	-0.441082	-0.150595	0.743695	0.64334	0.860196	1e-05
	State.23	0.216925	-0.00360727	0.423006	1.24225	0.996399	1.52654	0.0229
	State.24	0.00724191	-0.150181	0.159595	1.00727	0.860552	1.17304	0.4614
	State.25	0.0547093	-0.126806	0.228397	1.05623	0.880904	1.25658	0.2794
	State.26	0.21188	0.0762222	0.351201	1.236	1.0792	1.42077	0.0016
	State.27	-0.242169	-0.428697	-0.0610616	0.784923	0.651357	0.940765	0.005
	State.28	-0.167212	-0.314803	-0.0190822	0.84602	0.729933	0.981099	0.0145
	State.29	0.256198	0.14417	0.376589	1.29201	1.15508	1.45731	1e-05
	State.30	0.274014	0.123003	0.435139	1.31523	1.13089	1.54518	0.0003
	State.31	0.0690583	-0.0766255	0.207382	1.0715	0.926237	1.23045	0.1688
	State.32	0.154291	-0.0363733	0.335853	1.16683	0.96428	1.39913	0.051
	State.33	-0.0194921	-0.214808	0.179337	0.980697	0.806697	1.19642	0.4234
	State.34	-0.114635	-0.278928	0.0491623	0.891692	0.756595	1.05039	0.0856
	State.35	0.504952	0.349762	0.666401	1.65691	1.41873	1.94722	1e-05
	State.36	-0.262594	-0.388472	-0.122078	0.769054	0.678092	0.88508	0.0001
	State.37	-0.168624	-0.304103	-0.0468833	0.844827	0.737785	0.954199	0.0055
	State.38	-0.260545	-0.457978	-0.0617991	0.770631	0.632561	0.940072	0.0045
	State.39	-0.0862306	-0.227346	0.0549404	0.917383	0.796645	1.05648	0.1205
	State.40	-0.0538805	-0.19185	0.0845178	0.947545	0.825431	1.08819	0.2182
	State.41	0.0466227	-0.131188	0.230185	1.04773	0.877053	1.25883	0.3114
	State.42	-0.18435	-0.318915	-0.0473613	0.831645	0.726937	0.953743	0.003
	State.44	0.138023	-0.0996204	0.364303	1.148	0.905181	1.43951	0.1249
	State.45	-0.0438529	-0.176382	0.100092	0.957095	0.838298	1.10527	0.2595
	State.46	-0.596045	-0.768732	-0.429	0.550987	0.463601	0.65116	1e-05
	State.47	0.148081	0.0283461	0.276701	1.15961	1.02875	1.31877	0.0084
	State.48	0.0445193	-0.0984136	0.189749	1.04553	0.906274	1.20895	0.2741
	State.49	0.154971	-0.0487001	0.368994	1.16762	0.952467	1.44628	0.0775
	State.50	-0.160742	-0.376367	0.0381248	0.851512	0.68635	1.03886	0.0629
	State.51	0.0397767	-0.100524	0.17178	1.04058	0.904363	1.18742	0.2816
	State.53	0.114975	-0.054897	0.284717	1.12185	0.946583	1.32939	0.0934
	State.54	0.0737662	-0.0747391	0.229245	1.07656	0.927986	1.25765	0.1737
	State.55	-0.145852	-0.290581	-0.0042988	0.864286	0.747829	0.99571	0.0241
	State.56	0.020033	-0.154721	0.201019	1.02023	0.856655	1.22265	0.4184
	County Random Effects	post.mean	l-95% CI	u-95% CI	exp(mean)	exp(l-95% CI)	exp(u-95% CI)	pMCMC
	County.1001	-0.0214925	-0.298546	0.244391	0.978737	0.741896	1.27684	0.4355
	County.1003	0.0295143	-0.242259	0.296931	1.02995	0.784853	1.34572	0.4106
	County.1005	0.199645	-0.103712	0.501454	1.22097	0.901485	1.65112	0.0974
	County.1007	0.00344381	-0.296042	0.315975	1.00345	0.743756	1.3716	0.4919
	County.1009	-0.200687	-0.491311	0.0763128	0.818169	0.611824	1.0793	0.0829
	County.1011	-0.00699117	-0.360731	0.367348	0.993033	0.697166	1.4439	0.4863
	County.1013	0.112691	-0.213015	0.443552	1.11929	0.808144	1.55823	0.2487
	County.1015	-0.0127468	-0.255694	0.250907	0.987334	0.774379	1.28519	0.4625
	County.1017	-0.0996886	-0.390883	0.182289	0.905119	0.676459	1.19996	0.2459
	County.1019	0.0256134	-0.28249	0.339768	1.02594	0.753904	1.40462	0.4371
	County.1021	-0.0975285	-0.379035	0.173747	0.907077	0.684522	1.18975	0.2476
	County.1023	0.17742	-0.142172	0.487772	1.19413	0.867472	1.62868	0.139
	County.1025	-0.105199	-0.455227	0.219502	0.900145	0.634304	1.24546	0.2733
	County.1027	0.0604103	-0.275218	0.414011	1.06227	0.759407	1.51287	0.3675
	County.1029	-0.00491598	-0.316971	0.301138	0.995096	0.728352	1.3514	0.4868
	County.1031	-0.125157	-0.399734	0.168448	0.882358	0.670499	1.18347	0.1965
	County.1033	-0.112714	-0.375957	0.146802	0.893406	0.686632	1.15812	0.2033
	County.1035	0.242293	-0.0934916	0.592112	1.27417	0.910746	1.8078	0.0847
	County.1037	0.13919	-0.211273	0.473526	1.14934	0.809553	1.60565	0.2147
	County.1039	-0.0302606	-0.310167	0.266427	0.970193	0.733325	1.30529	0.4201
	County.1041	-0.158396	-0.488578	0.174094	0.853512	0.613498	1.19017	0.1754
	County.1043	0.0106658	-0.255156	0.252683	1.01072	0.774795	1.28748	0.4686
	County.1045	0.0456173	-0.243231	0.333518	1.04667	0.784091	1.39587	0.3784
	County.1047	-0.197781	-0.500041	0.10984	0.82055	0.606506	1.1161	0.104
	County.1049	0.115906	-0.151499	0.375942	1.12289	0.859418	1.45636	0.193
	County.1051	0.0307144	-0.236027	0.261387	1.03119	0.78976	1.29873	0.4052
	County.1053	-0.0277657	-0.333811	0.271332	0.972616	0.716189	1.31171	0.426
	County.1055	0.137219	-0.108068	0.378523	1.14708	0.897567	1.46013	0.1384
	County.1057	0.0600301	-0.255022	0.389863	1.06187	0.774899	1.47678	0.3566
	County.1059	0.00565287	-0.291549	0.308697	1.00567	0.747106	1.36165	0.4857
	County.1061	-0.106236	-0.412379	0.193161	0.899212	0.662073	1.21308	0.2492
	County.1063	0.0123686	-0.386919	0.373618	1.01245	0.679146	1.45298	0.4749
	County.1065	0.0531401	-0.303402	0.404672	1.05458	0.738302	1.49881	0.384
	County.1067	-0.0478275	-0.36695	0.285534	0.953298	0.692844	1.33047	0.3822
	County.1069	-0.0376117	-0.302753	0.222886	0.963087	0.738782	1.24968	0.3875
	County.1071	0.132507	-0.139799	0.401008	1.14169	0.869533	1.49333	0.1639
	County.1073	-0.0470143	-0.267882	0.179145	0.954074	0.764998	1.19619	0.3353
	County.1075	-0.100087	-0.428727	0.218347	0.904759	0.651338	1.24402	0.2711
	County.1077	0.130772	-0.127682	0.373025	1.13971	0.880133	1.45212	0.1506
	County.1079	-0.0828956	-0.361989	0.190557	0.920447	0.69629	1.20992	0.2754
	County.1081	-0.0527785	-0.306612	0.186474	0.94859	0.735936	1.20499	0.3365
	County.1083	0.192383	-0.0449588	0.445792	1.21213	0.956037	1.56173	0.0623
	County.1085	-0.130149	-0.4868	0.230107	0.877964	0.61459	1.25873	0.2424
	County.1087	-0.114905	-0.45231	0.227502	0.891451	0.636157	1.25546	0.2557
	County.1089	0.241999	0.00940528	0.486788	1.27379	1.00945	1.62708	0.0245
	County.1091	0.0692933	-0.250657	0.390064	1.07175	0.778289	1.47708	0.3367
	County.1093	-0.0833129	-0.390026	0.212389	0.920063	0.677039	1.23663	0.2979
	County.1095	0.000691811	-0.258533	0.261174	1.00069	0.772183	1.29845	0.5017
	County.1097	-0.187749	-0.437798	0.0570628	0.828823	0.645456	1.05872	0.0669
	County.1099	0.103194	-0.223065	0.432962	1.10871	0.800063	1.54182	0.2676
	County.1101	0.1035	-0.144311	0.331864	1.10905	0.865619	1.39356	0.1963
	County.1103	0.0110904	-0.223024	0.261383	1.01115	0.800096	1.29873	0.4596
	County.1105	0.0303385	-0.342285	0.395836	1.0308	0.710145	1.48563	0.4305
	County.1107	-0.0660316	-0.377386	0.265829	0.936101	0.685651	1.30451	0.3452
	County.1109	-0.0898739	-0.386842	0.21477	0.914046	0.679198	1.23958	0.2826
	County.1111	0.167483	-0.126732	0.473274	1.18233	0.88097	1.60524	0.1379
	County.1113	0.137567	-0.127952	0.394341	1.14748	0.879895	1.48341	0.1515
	County.1115	-0.0177766	-0.290531	0.253766	0.982381	0.747866	1.28887	0.4491
	County.1117	-0.120003	-0.35693	0.140263	0.886918	0.699822	1.15058	0.1703
	County.1119	-0.285252	-0.626071	0.0744704	0.751825	0.534688	1.07731	0.0575
	County.1121	-0.0400862	-0.316455	0.227529	0.960707	0.728728	1.25549	0.3807
	County.1123	-0.0879157	-0.379642	0.198326	0.915838	0.684106	1.21936	0.2758
	County.1125	-0.121565	-0.366943	0.123254	0.885534	0.692849	1.13117	0.1644
	County.1127	0.098828	-0.169563	0.348586	1.10388	0.844034	1.41706	0.2256
	County.1129	-0.0816949	-0.441588	0.259213	0.921553	0.643015	1.29591	0.3297
	County.1131	0.091223	-0.292846	0.457523	1.09551	0.746137	1.58015	0.3154
	County.1133	0.110169	-0.188603	0.417239	1.11647	0.828115	1.51777	0.2396
	County.4001	-0.130651	-0.501456	0.206383	0.877524	0.605648	1.22922	0.2375
	County.4003	0.100865	-0.17939	0.378617	1.10613	0.83578	1.46026	0.2442
	County.4005	0.254472	-0.0232573	0.534271	1.28978	0.977011	1.7062	0.0372
	County.4007	-0.33485	-0.620675	-0.0296529	0.715446	0.537582	0.970782	0.0134
	County.4009	-0.0575287	-0.356098	0.241638	0.944095	0.700404	1.27333	0.349
	County.4011	0.0835525	-0.224458	0.414613	1.08714	0.798949	1.51378	0.3052
	County.4012	0.328772	-0.0260555	0.669213	1.38926	0.974281	1.9527	0.0336
	County.4013	0.0803835	-0.168938	0.324525	1.0837	0.844561	1.38337	0.258
	County.4015	0.0433458	-0.231298	0.308517	1.0443	0.793503	1.3614	0.3799
	County.4017	-0.0195691	-0.321608	0.316813	0.980621	0.724982	1.37275	0.4468
	County.4019	-0.0240173	-0.278644	0.229206	0.976269	0.756809	1.2576	0.4231
	County.4021	0.0473101	-0.239352	0.330011	1.04845	0.787138	1.39098	0.3715
	County.4023	-0.23777	-0.592192	0.0989875	0.788384	0.553113	1.10405	0.0853
	County.4025	0.173127	-0.0949673	0.441991	1.18902	0.909403	1.5558	0.1017
	County.4027	-0.443891	-0.7169	-0.167963	0.641535	0.488264	0.845385	0.0006
	County.5001	0.0972013	-0.24323	0.42448	1.10208	0.784091	1.52879	0.284
	County.5003	0.129715	-0.179615	0.434582	1.1385	0.835592	1.54432	0.1995
	County.5005	0.0934407	-0.199538	0.394113	1.09795	0.819109	1.48307	0.2649
	County.5007	-0.17188	-0.430342	0.104333	0.84208	0.650286	1.10997	0.1043
	County.5009	-0.0104291	-0.288554	0.266186	0.989625	0.749346	1.30498	0.4711
	County.5011	0.0895909	-0.272581	0.462506	1.09373	0.761412	1.58805	0.3152
	County.5013	0.0226655	-0.345955	0.378135	1.02292	0.707544	1.45956	0.4505
	County.5015	0.134873	-0.158134	0.418003	1.14439	0.853736	1.51893	0.1769
	County.5017	0.0259633	-0.347367	0.410348	1.0263	0.706546	1.50734	0.4466
	County.5019	-0.179075	-0.503472	0.155787	0.836043	0.604429	1.16858	0.1408
	County.5021	0.0897975	-0.229423	0.42525	1.09395	0.794992	1.52997	0.2914
	County.5023	0.308313	0.00552837	0.614097	1.36113	1.00554	1.84799	0.0264
	County.5025	-0.193246	-0.54348	0.174156	0.824279	0.580724	1.19024	0.1482
	County.5027	0.0835227	-0.216488	0.394938	1.08711	0.805342	1.48429	0.2953
	County.5029	-0.142158	-0.451494	0.184496	0.867484	0.636676	1.20261	0.1967
	County.5031	-0.228409	-0.518195	0.050601	0.795799	0.595595	1.0519	0.0569
	County.5033	-0.181334	-0.473348	0.0868153	0.834156	0.622913	1.0907	0.1035
	County.5035	0.121513	-0.156172	0.415427	1.1292	0.855412	1.51502	0.202
	County.5037	-0.39466	-0.721639	-0.0621026	0.673909	0.485955	0.939786	0.0092
	County.5039	-0.126048	-0.508535	0.238105	0.881572	0.601376	1.26884	0.2527
	County.5041	-0.0315392	-0.41672	0.347343	0.968953	0.659206	1.4153	0.4327
	County.5043	-0.0557373	-0.395798	0.275468	0.945788	0.673143	1.31715	0.372
	County.5045	0.0414852	-0.231098	0.298727	1.04236	0.793662	1.34814	0.3793
	County.5047	-0.147968	-0.465953	0.177756	0.862458	0.627537	1.19453	0.1844
	County.5049	0.239811	-0.115366	0.59858	1.27101	0.89104	1.81953	0.0952
	County.5051	-0.0606946	-0.334782	0.221324	0.941111	0.715494	1.24773	0.3296
	County.5053	0.193696	-0.124645	0.503667	1.21373	0.88281	1.65478	0.1141
	County.5055	0.547058	0.276664	0.822364	1.72816	1.31872	2.27587	1e-05
	County.5057	0.00987822	-0.308519	0.326818	1.00993	0.734534	1.38655	0.473
	County.5059	-0.116174	-0.423504	0.1669	0.89032	0.654749	1.18164	0.2213
	County.5061	0.0429651	-0.270465	0.364526	1.0439	0.763025	1.43983	0.3897
	County.5063	0.0448049	-0.253721	0.362126	1.04582	0.775908	1.43638	0.3879
	County.5065	0.0603017	-0.270158	0.404531	1.06216	0.763259	1.4986	0.3568
	County.5067	0.0436274	-0.328398	0.395965	1.04459	0.720076	1.48582	0.406
	County.5069	-0.257095	-0.545592	0.0469216	0.773295	0.579498	1.04804	0.0437
	County.5071	-0.0251726	-0.310923	0.272503	0.975142	0.73277	1.31325	0.4373
	County.5073	0.0293288	-0.327805	0.396934	1.02976	0.720504	1.48726	0.4327
	County.5075	-0.222709	-0.581669	0.104605	0.800348	0.558965	1.11027	0.1053
	County.5077	-0.0397501	-0.439132	0.345689	0.96103	0.644596	1.41296	0.4206
	County.5079	0.165546	-0.205013	0.537304	1.18004	0.814637	1.71139	0.1912
	County.5081	-0.273577	-0.600809	0.0682939	0.760654	0.548368	1.07068	0.0554
	County.5083	0.05065	-0.240623	0.336567	1.05195	0.786138	1.40013	0.3644
	County.5085	0.135436	-0.144491	0.415796	1.14504	0.865463	1.51558	0.1683
	County.5087	-0.152346	-0.480951	0.198651	0.858691	0.618195	1.21976	0.1901
	County.5089	0.162455	-0.163932	0.477807	1.17639	0.8488	1.61253	0.1614
	County.5091	-0.126043	-0.427752	0.163569	0.881577	0.651973	1.17771	0.2044
	County.5093	-0.0517615	-0.348323	0.254337	0.949555	0.705871	1.28961	0.3678
	County.5095	0.0455157	-0.350213	0.432811	1.04657	0.704538	1.54158	0.4063
	County.5097	-0.117657	-0.511966	0.276596	0.889001	0.599316	1.31863	0.2765
	County.5099	0.113383	-0.222645	0.48137	1.12006	0.800399	1.61829	0.2651
	County.5101	0.00561867	-0.3668	0.362372	1.00563	0.692948	1.43673	0.4826
	County.5103	0.0163378	-0.303207	0.321933	1.01647	0.738446	1.37979	0.4599
	County.5105	-0.0544141	-0.416822	0.302841	0.94704	0.659138	1.3537	0.3868
	County.5107	0.088996	-0.278796	0.463385	1.09308	0.756695	1.58945	0.3111
	County.5109	-0.0160352	-0.361278	0.342253	0.984093	0.696785	1.40812	0.4651
	County.5111	-0.055745	-0.378067	0.263634	0.94578	0.685184	1.30165	0.3697
	County.5113	0.00860205	-0.309485	0.315408	1.00864	0.733824	1.37082	0.4759
	County.5115	0.101643	-0.171556	0.379144	1.10699	0.842353	1.46103	0.234
	County.5117	0.227113	-0.144011	0.576922	1.25497	0.865878	1.78055	0.1032
	County.5119	0.0160367	-0.232488	0.264447	1.01617	0.792559	1.30271	0.4491
	County.5121	0.0862512	-0.261527	0.411615	1.09008	0.769875	1.50925	0.3022
	County.5123	-0.149744	-0.473847	0.20159	0.860928	0.622603	1.22335	0.1944
	County.5125	0.0142894	-0.245295	0.285145	1.01439	0.782474	1.32995	0.4575
	County.5127	0.162358	-0.149548	0.472358	1.17628	0.861097	1.60377	0.16
	County.5129	0.0934745	-0.299752	0.472945	1.09798	0.741002	1.60471	0.323
	County.5131	-0.200486	-0.480311	0.066737	0.818333	0.618591	1.06901	0.078
	County.5133	-0.187152	-0.525535	0.119104	0.829318	0.591239	1.12649	0.1251
	County.5135	0.0872711	-0.251972	0.425077	1.09119	0.777267	1.52971	0.3085
	County.5137	0.00349648	-0.367414	0.380754	1.0035	0.692523	1.46339	0.4965
	County.5139	-0.0330279	-0.33459	0.257523	0.967512	0.715631	1.29372	0.417
	County.5141	-0.000355453	-0.350905	0.36111	0.999645	0.704051	1.43492	0.5056
	County.5143	-0.156993	-0.417441	0.115206	0.85471	0.65873	1.1221	0.1244
	County.5145	-0.115618	-0.39095	0.161044	0.890816	0.676414	1.17474	0.2051
	County.5147	0.245535	-0.1216	0.613142	1.2783	0.885503	1.84622	0.0948
	County.5149	0.0223824	-0.291305	0.344441	1.02263	0.747287	1.4112	0.4436
	County.6001	0.115578	-0.122169	0.350624	1.12252	0.884999	1.41995	0.1686
	County.6003	-0.0466089	-0.424189	0.377119	0.954461	0.6543	1.45808	0.4181
	County.6005	-0.10254	-0.383831	0.178967	0.902542	0.681247	1.19598	0.2379
	County.6007	0.335925	0.102657	0.585116	1.39923	1.10811	1.7952	0.0032
	County.6009	-0.284144	-0.553578	0.00277315	0.752658	0.574889	1.00278	0.0221
	County.6011	-0.0929122	-0.400463	0.213071	0.911274	0.67001	1.23747	0.2842
	County.6013	0.244711	0.0153901	0.471062	1.27725	1.01551	1.60169	0.0179
	County.6015	0.227971	-0.0725179	0.508398	1.25605	0.930049	1.66263	0.0623
	County.6017	0.064237	-0.183675	0.316678	1.06635	0.832206	1.37256	0.3116
	County.6019	-0.106366	-0.328177	0.119536	0.899095	0.720236	1.12697	0.1741
	County.6021	0.148869	-0.11547	0.434253	1.16052	0.890948	1.54381	0.1426
	County.6023	0.187774	-0.0660204	0.446729	1.20656	0.936112	1.56319	0.0751
	County.6025	-0.345307	-0.624818	-0.0932344	0.708003	0.535359	0.91098	0.0051
	County.6027	-0.153122	-0.461078	0.156958	0.858025	0.630604	1.16995	0.1707
	County.6029	0.155453	-0.115832	0.429108	1.16819	0.890625	1.53589	0.1345
	County.6031	0.0749345	-0.164701	0.303595	1.07781	0.848148	1.35472	0.2696
	County.6033	-0.344385	-0.614789	-0.0858671	0.708656	0.540755	0.917716	0.0077
	County.6035	0.204326	-0.0745068	0.491564	1.2267	0.928201	1.63487	0.0801
	County.6037	-0.160632	-0.414739	0.0847979	0.851605	0.660513	1.0885	0.1052
	County.6039	-0.104871	-0.360818	0.138091	0.90044	0.697106	1.14808	0.2083
	County.6041	-0.194267	-0.441255	0.0435396	0.823438	0.643229	1.0445	0.0579
	County.6043	0.131165	-0.155067	0.431892	1.14016	0.856358	1.54017	0.1903
	County.6045	-0.223961	-0.486401	0.0414212	0.799346	0.614835	1.04229	0.0499
	County.6047	-0.0876048	-0.317213	0.14755	0.916123	0.728175	1.15899	0.2277
	County.6049	0.102842	-0.221827	0.418248	1.10832	0.801054	1.5193	0.2651
	County.6051	0.00934157	-0.29097	0.34066	1.00939	0.747538	1.40588	0.4819
	County.6053	0.0682148	-0.148742	0.299523	1.0706	0.861792	1.34922	0.2746
	County.6055	-0.0139188	-0.23559	0.221513	0.986178	0.790105	1.24796	0.4524
	County.6057	-0.0192178	-0.287658	0.234462	0.980966	0.750018	1.26423	0.4467
	County.6059	-0.141996	-0.377433	0.0954656	0.867625	0.685619	1.10017	0.1195
	County.6061	0.0147532	-0.224326	0.255401	1.01486	0.799055	1.29098	0.4485
	County.6063	-0.010021	-0.304384	0.276013	0.990029	0.737578	1.31786	0.4727
	County.6065	-0.0935592	-0.339279	0.141506	0.910684	0.712284	1.15201	0.2246
	County.6067	0.412216	0.198829	0.639488	1.51016	1.21997	1.89551	0.0001
	County.6069	0.00803527	-0.24972	0.262782	1.00807	0.779019	1.30054	0.4762
	County.6071	-0.104549	-0.371409	0.153923	0.900731	0.689762	1.1664	0.2153
	County.6073	-0.384193	-0.606147	-0.151142	0.681	0.545449	0.859726	0.0002
	County.6075	-0.165503	-0.385094	0.0727051	0.847468	0.680386	1.07541	0.0825
	County.6077	-0.109884	-0.330446	0.132307	0.895938	0.718603	1.14146	0.1809
	County.6079	0.348619	0.10884	0.578664	1.41711	1.11498	1.78365	0.0015
	County.6081	-0.294453	-0.513441	-0.0560856	0.744939	0.598433	0.945458	0.0063
	County.6083	0.0500372	-0.19732	0.29462	1.05131	0.820928	1.34262	0.3479
	County.6085	-0.0887742	-0.308554	0.135935	0.915052	0.734509	1.14561	0.2134
	County.6087	0.0865476	-0.147252	0.307879	1.0904	0.863077	1.36054	0.2319
	County.6089	0.00704314	-0.254096	0.262355	1.00707	0.775618	1.29999	0.4812
	County.6091	0.0722502	-0.294936	0.429604	1.07492	0.744579	1.53665	0.3472
	County.6093	0.0397944	-0.25206	0.341229	1.0406	0.777198	1.40667	0.4016
	County.6095	0.140715	-0.0933446	0.363844	1.1511	0.91088	1.43885	0.1162
	County.6097	-0.171863	-0.400519	0.0497643	0.842095	0.669972	1.05102	0.0672
	County.6099	-0.248034	-0.473643	-0.0300867	0.780333	0.62273	0.970361	0.0142
	County.6101	0.0671052	-0.193397	0.326131	1.06941	0.824154	1.3856	0.2989
	County.6103	0.290988	0.0317666	0.552568	1.33775	1.03228	1.73771	0.0149
	County.6105	0.245952	-0.0708146	0.55923	1.27884	0.931635	1.74933	0.061
	County.6107	0.16955	-0.0723142	0.403515	1.18477	0.930239	1.49708	0.0799
	County.6109	0.0557914	-0.216537	0.322804	1.05738	0.805303	1.38099	0.3426
	County.6111	-0.0408511	-0.315731	0.201863	0.959972	0.729256	1.22368	0.3792
	County.6113	0.282391	0.0604799	0.516525	1.3263	1.06235	1.67619	0.0067
	County.6115	-0.00984033	-0.268328	0.25041	0.990208	0.764657	1.28455	0.4687
	County.8001	0.0278814	-0.224702	0.26198	1.02827	0.798754	1.2995	0.4194
	County.8003	-0.0872548	-0.442007	0.286792	0.916444	0.642745	1.33215	0.3144
	County.8005	0.204514	-0.0539299	0.434549	1.22693	0.947499	1.54427	0.0538
	County.8007	-0.0112805	-0.368868	0.324058	0.988783	0.691517	1.38273	0.4812
	County.8009	-0.0544527	-0.447162	0.333749	0.947003	0.63944	1.39619	0.3973
	County.8011	0.0458419	-0.372945	0.446209	1.04691	0.688703	1.56238	0.4178
	County.8013	0.0393419	-0.210224	0.29025	1.04013	0.810403	1.33676	0.3807
	County.8015	-0.0486235	-0.377767	0.25427	0.95254	0.68539	1.28952	0.387
	County.8017	-0.0685226	-0.466605	0.345015	0.933772	0.627128	1.41201	0.3661
	County.8019	0.0853878	-0.261257	0.414115	1.08914	0.770083	1.51303	0.3101
	County.8021	-0.0132334	-0.413369	0.389278	0.986854	0.661418	1.47591	0.4727
	County.8023	-0.0363615	-0.456974	0.364946	0.964292	0.633197	1.44044	0.4262
	County.8025	-0.0832262	-0.475912	0.301311	0.920143	0.621318	1.35163	0.345
	County.8027	0.00494069	-0.375556	0.396362	1.00495	0.686907	1.48641	0.4851
	County.8029	0.00277596	-0.307249	0.282869	1.00278	0.735467	1.32693	0.484
	County.8031	-0.123504	-0.390643	0.119085	0.883818	0.676621	1.12647	0.1714
	County.8033	0.0827009	-0.316456	0.481857	1.08622	0.728727	1.61908	0.3419
	County.8035	-0.200584	-0.471156	0.0927029	0.818253	0.62428	1.09714	0.0851
	County.8037	-0.0556071	-0.317144	0.22431	0.945911	0.728226	1.25146	0.3428
	County.8039	0.0131616	-0.30318	0.316545	1.01325	0.738466	1.37238	0.4694
	County.8041	0.120374	-0.123719	0.394336	1.12792	0.883628	1.4834	0.1761
	County.8043	-0.316723	-0.617645	-0.00673444	0.728533	0.539213	0.993288	0.0218
	County.8045	-0.142101	-0.434929	0.148344	0.867533	0.647311	1.15991	0.1756
	County.8047	0.185696	-0.177483	0.542518	1.20406	0.837375	1.72033	0.1551
	County.8049	-0.0116265	-0.356455	0.324663	0.988441	0.700154	1.38356	0.4751
	County.8051	0.234385	-0.0876708	0.584747	1.26413	0.916062	1.79454	0.0887
	County.8053	-0.00270025	-0.444147	0.397004	0.997303	0.641371	1.48736	0.4971
	County.8055	0.0911433	-0.27788	0.467695	1.09543	0.757388	1.59631	0.315
	County.8057	0.0591748	-0.359454	0.457096	1.06096	0.698057	1.57948	0.3904
	County.8059	-0.046838	-0.288346	0.198943	0.954242	0.749503	1.22011	0.3567
	County.8061	-0.00599028	-0.423647	0.395495	0.994028	0.654655	1.48512	0.4936
	County.8063	0.170277	-0.190813	0.52526	1.18563	0.826287	1.6909	0.1716
	County.8065	0.690249	0.3634	1.00654	1.99421	1.43821	2.73612	1e-05
	County.8067	-0.064953	-0.344666	0.235847	0.937112	0.708457	1.26598	0.3267
	County.8069	0.0740325	-0.195023	0.336698	1.07684	0.822816	1.40032	0.2925
	County.8071	0.207508	-0.124431	0.538944	1.23061	0.882999	1.71419	0.1097
	County.8073	-0.0780252	-0.448223	0.289164	0.924941	0.638762	1.33531	0.3429
	County.8075	-0.182992	-0.528644	0.138229	0.832775	0.589404	1.14824	0.1417
	County.8077	-0.0597761	-0.338472	0.235697	0.941975	0.712859	1.26579	0.342
	County.8079	0.0431991	-0.33995	0.482795	1.04415	0.711806	1.6206	0.4236
	County.8081	-0.174541	-0.479987	0.133688	0.839842	0.618792	1.14304	0.1378
	County.8083	0.0400182	-0.255295	0.349446	1.04083	0.774688	1.41828	0.399
	County.8085	-0.0257477	-0.319471	0.266612	0.974581	0.726533	1.30553	0.4371
	County.8087	-0.15735	-0.455458	0.145127	0.854405	0.634158	1.15619	0.156
	County.8089	-0.0556835	-0.39573	0.277005	0.945838	0.673189	1.31917	0.3702
	County.8091	0.0440698	-0.340432	0.432338	1.04506	0.711463	1.54086	0.4115
	County.8093	0.127402	-0.18352	0.429224	1.13587	0.832335	1.53607	0.2102
	County.8095	-0.080862	-0.480361	0.306506	0.922321	0.61856	1.35867	0.3454
	County.8097	-0.27221	-0.593863	0.0550211	0.761694	0.55219	1.05656	0.0496
	County.8099	-0.108407	-0.495441	0.254875	0.897262	0.609302	1.2903	0.2869
	County.8101	0.180839	-0.0905078	0.446354	1.19822	0.913467	1.5626	0.0932
	County.8103	-0.0800208	-0.439219	0.290767	0.923097	0.64454	1.33745	0.3323
	County.8105	-0.0963024	-0.469117	0.267842	0.908189	0.625555	1.30714	0.3078
	County.8107	-0.123593	-0.422978	0.159201	0.88374	0.655093	1.17257	0.2004
	County.8109	0.000189978	-0.421735	0.413214	1.00019	0.655908	1.51167	0.5015
	County.8111	-0.0251225	-0.44372	0.390588	0.97519	0.641645	1.47785	0.452
	County.8113	0.0682133	-0.301239	0.446674	1.07059	0.739901	1.5631	0.3569
	County.8115	-0.0136663	-0.403546	0.40007	0.986427	0.667947	1.49193	0.4794
	County.8117	-0.0471996	-0.340871	0.244981	0.953897	0.71115	1.2776	0.3727
	County.8119	-0.0853076	-0.392569	0.211001	0.91823	0.67532	1.23491	0.293
	County.8121	0.0288315	-0.362597	0.390855	1.02925	0.695867	1.47824	0.4364
	County.8123	0.0423993	-0.24459	0.307174	1.04331	0.783025	1.35958	0.3849
	County.8125	-0.158729	-0.521924	0.184641	0.853227	0.593378	1.20279	0.1853
	County.9001	0.00643779	-0.22727	0.252324	1.00646	0.796705	1.28701	0.4795
	County.9003	-0.105057	-0.33206	0.13737	0.900273	0.717444	1.14725	0.1934
	County.9005	-0.147112	-0.422601	0.106797	0.863197	0.65534	1.11271	0.1351
	County.9007	-0.0656945	-0.320216	0.182068	0.936417	0.725992	1.1997	0.3044
	County.9009	0.0319026	-0.216142	0.254309	1.03242	0.805621	1.28957	0.3946
	County.9011	0.186112	-0.0749722	0.427501	1.20456	0.927769	1.53342	0.0704
	County.9013	0.114602	-0.153316	0.370902	1.12143	0.857859	1.44904	0.1937
	County.9015	0.115645	-0.157443	0.382308	1.1226	0.854325	1.46566	0.1994
	County.10001	0.0816982	-0.234381	0.375531	1.08513	0.79106	1.45576	0.3008
	County.10003	0.115258	-0.180841	0.407315	1.12216	0.834568	1.50278	0.2232
	County.10005	-0.0846745	-0.38351	0.222341	0.918811	0.681465	1.249	0.2868
	County.11001	0.0256135	-0.301133	0.343854	1.02594	0.739979	1.41037	0.4351
	County.12001	-0.186353	-0.432224	0.0781433	0.82998	0.649064	1.08128	0.0728
	County.12003	0.000139997	-0.26769	0.284871	1.00014	0.765145	1.32959	0.4986
	County.12005	-0.162588	-0.416308	0.103701	0.849941	0.659477	1.10927	0.1094
	County.12007	0.138257	-0.147482	0.433791	1.14827	0.862878	1.5431	0.1813
	County.12009	-0.254296	-0.48813	-0.0260808	0.775463	0.613773	0.974256	0.0164
	County.12011	-0.0684742	-0.299816	0.169922	0.933818	0.740955	1.18521	0.2747
	County.12013	-0.0453864	-0.413315	0.314941	0.955628	0.661454	1.37018	0.4093
	County.12015	-0.0501698	-0.300126	0.19418	0.951068	0.740725	1.21431	0.3472
	County.12017	0.110221	-0.136939	0.369583	1.11653	0.872024	1.44713	0.1973
	County.12019	0.256402	0.0202664	0.506322	1.29227	1.02047	1.65918	0.0213
	County.12021	0.0886228	-0.155344	0.32875	1.09267	0.856121	1.38923	0.2356
	County.12023	-0.0809477	-0.347572	0.183501	0.922242	0.706401	1.20142	0.2759
	County.12027	-0.0443266	-0.402041	0.291055	0.956641	0.668953	1.33784	0.4053
	County.12029	-0.268959	-0.615026	0.0937514	0.764174	0.540627	1.09829	0.069
	County.12031	0.0999981	-0.127979	0.333473	1.10517	0.879871	1.39581	0.1969
	County.12033	-0.110538	-0.364844	0.155858	0.895353	0.694305	1.16866	0.2013
	County.12035	0.100802	-0.169073	0.376545	1.10606	0.844447	1.45724	0.2349
	County.12037	0.0139139	-0.368213	0.400063	1.01401	0.69197	1.49192	0.4731
	County.12039	-0.132771	-0.467526	0.189889	0.875665	0.62655	1.20912	0.21
	County.12041	0.0855763	-0.241765	0.427784	1.08934	0.785241	1.53385	0.3077
	County.12043	-0.0612193	-0.461718	0.322828	0.940617	0.6302	1.38103	0.3811
	County.12045	0.0380587	-0.327436	0.383839	1.03879	0.720769	1.46791	0.4143
	County.12047	0.0707159	-0.281854	0.401958	1.07328	0.754384	1.49475	0.3414
	County.12049	-0.0321381	-0.378325	0.293326	0.968373	0.685008	1.34088	0.4305
	County.12051	-0.0561943	-0.384727	0.281683	0.945355	0.680637	1.32536	0.3741
	County.12053	0.0961379	-0.147547	0.320468	1.10091	0.862821	1.37777	0.2139
	County.12055	-0.108801	-0.376368	0.157821	0.896909	0.686349	1.17096	0.2143
	County.12057	0.1153	-0.108746	0.343211	1.12221	0.896958	1.40947	0.1623
	County.12059	-0.213982	-0.561403	0.12864	0.807363	0.570408	1.13728	0.1127
	County.12061	0.111093	-0.136479	0.372127	1.1175	0.872424	1.45082	0.1968
	County.12063	0.0722216	-0.238887	0.389085	1.07489	0.787504	1.47563	0.3256
	County.12065	-0.0241708	-0.379866	0.330921	0.976119	0.683953	1.39225	0.4427
	County.12067	0.0741846	-0.324345	0.461983	1.07701	0.723001	1.58722	0.3573
	County.12069	-0.093047	-0.323726	0.143515	0.911151	0.723448	1.15432	0.2195
	County.12071	-0.0481358	-0.279401	0.191393	0.953004	0.756237	1.21094	0.3431
	County.12073	0.0932279	-0.150614	0.353485	1.09771	0.86018	1.42402	0.2325
	County.12075	-0.173823	-0.485579	0.110013	0.840446	0.615341	1.11629	0.1271
	County.12077	0.0497252	-0.347177	0.422956	1.05098	0.70668	1.52647	0.3922
	County.12079	-0.0477829	-0.387722	0.256573	0.953341	0.678601	1.29249	0.3888
	County.12081	-0.0249492	-0.263742	0.209253	0.975359	0.768172	1.23276	0.4182
	County.12083	0.0908506	-0.127304	0.328983	1.09511	0.880466	1.38955	0.2198
	County.12085	0.205219	-0.0391858	0.453817	1.22779	0.961572	1.57431	0.0519
	County.12086	-0.0599256	-0.299731	0.188429	0.941835	0.741018	1.20735	0.3206
	County.12087	0.138543	-0.162322	0.420718	1.1486	0.850168	1.52305	0.1834
	County.12089	0.0354975	-0.223254	0.303924	1.03614	0.799912	1.35517	0.3949
	County.12091	-0.183437	-0.44695	0.0706553	0.832404	0.639576	1.07321	0.0802
	County.12093	0.0984032	-0.204153	0.422662	1.10341	0.815337	1.52602	0.2657
	County.12095	0.0358228	-0.177333	0.248328	1.03647	0.8375	1.28188	0.3748
	County.12097	-0.0731787	-0.312559	0.159043	0.929435	0.731572	1.17239	0.2751
	County.12099	-0.11593	-0.351013	0.111799	0.890538	0.703975	1.11829	0.1634
	County.12101	0.149627	-0.10355	0.375881	1.1614	0.901631	1.45627	0.1057
	County.12103	-0.020033	-0.254492	0.212791	0.980166	0.77531	1.23713	0.4334
	County.12105	-0.00357006	-0.234061	0.218675	0.996436	0.791314	1.24443	0.4832
	County.12107	0.227048	-0.0415892	0.494131	1.25489	0.959264	1.63907	0.0479
	County.12109	0.198693	-0.0378453	0.441696	1.21981	0.962862	1.55534	0.0552
	County.12111	0.0398195	-0.207411	0.275633	1.04062	0.812686	1.31736	0.3714
	County.12113	-0.246567	-0.524604	0.0134351	0.781479	0.591789	1.01353	0.0372
	County.12115	0.179399	-0.0531104	0.410258	1.1965	0.948275	1.50721	0.0633
	County.12117	0.146437	-0.0671349	0.364003	1.1577	0.935069	1.43908	0.0897
	County.12119	-0.0862325	-0.368256	0.191207	0.917381	0.69194	1.21071	0.265
	County.12121	-0.113928	-0.396221	0.186685	0.892322	0.672858	1.20525	0.2199
	County.12123	-0.0196063	-0.341971	0.319777	0.980585	0.710369	1.37682	0.4522
	County.12125	0.13514	-0.169299	0.446575	1.1447	0.844256	1.56295	0.196
	County.12127	-0.0133134	-0.236418	0.201282	0.986775	0.78945	1.22297	0.4563
	County.12129	0.0547482	-0.274495	0.360975	1.05627	0.759956	1.43473	0.367
	County.12131	-0.144272	-0.443856	0.155069	0.865653	0.641558	1.16774	0.1695
	County.12133	-0.00222012	-0.337134	0.32967	0.997782	0.713813	1.39051	0.4919
	County.13001	-0.138754	-0.423492	0.138898	0.870442	0.654756	1.14901	0.1649
	County.13003	-0.245579	-0.572196	0.088209	0.782252	0.564285	1.09222	0.0698
	County.13005	-0.45781	-0.786463	-0.149581	0.632668	0.455453	0.861069	0.0022
	County.13007	-0.142193	-0.505432	0.262946	0.867454	0.603245	1.30076	0.2369
	County.13009	0.390758	0.146103	0.636755	1.4781	1.15732	1.89034	0.0007
	County.13011	-0.180212	-0.444711	0.0981183	0.835093	0.64101	1.10309	0.0968
	County.13013	0.105031	-0.133238	0.347183	1.11075	0.875257	1.41508	0.1942
	County.13015	-0.00200751	-0.220758	0.223263	0.997995	0.801911	1.25015	0.4943
	County.13017	-0.0785934	-0.352566	0.185771	0.924416	0.702882	1.20415	0.2855
	County.13019	0.118524	-0.146383	0.392916	1.12583	0.863827	1.48129	0.1954
	County.13021	0.328719	0.101251	0.553673	1.38919	1.10655	1.73963	0.0025
	County.13023	0.0164157	-0.263442	0.289097	1.01655	0.768403	1.33522	0.4453
	County.13025	0.0173228	-0.272904	0.307915	1.01747	0.761166	1.36058	0.4506
	County.13027	0.0710485	-0.233205	0.381526	1.07363	0.791991	1.46452	0.3183
	County.13029	-0.0598244	-0.332839	0.195541	0.94193	0.716886	1.21597	0.3287
	County.13031	0.101177	-0.154754	0.343992	1.10647	0.856626	1.41057	0.2131
	County.13033	-0.180048	-0.468165	0.0984116	0.83523	0.62615	1.10342	0.1095
	County.13035	-0.0902139	-0.358411	0.163895	0.913736	0.698786	1.17809	0.2509
	County.13037	0.0612705	-0.289914	0.414593	1.06319	0.748328	1.51375	0.3599
	County.13039	0.195906	-0.0725208	0.453646	1.21641	0.930046	1.57404	0.0753
	County.13043	0.0231896	-0.298272	0.311413	1.02346	0.7421	1.36535	0.4376
	County.13045	0.0157844	-0.210173	0.235513	1.01591	0.810444	1.26556	0.4463
	County.13047	-0.0380728	-0.283584	0.217	0.962643	0.75308	1.24234	0.3876
	County.13049	-0.0790698	-0.391864	0.221533	0.923975	0.675796	1.24799	0.3067
	County.13051	0.157015	-0.0758563	0.393836	1.17001	0.926949	1.48266	0.0912
	County.13053	-0.0175432	-0.360114	0.342824	0.98261	0.697596	1.40892	0.4642
	County.13055	0.103306	-0.156942	0.36256	1.10883	0.854753	1.437	0.218
	County.13057	0.187963	-0.0369186	0.399796	1.20679	0.963755	1.49152	0.0449
	County.13059	-0.241753	-0.484684	-0.00607835	0.78525	0.615892	0.99394	0.0248
	County.13061	0.19762	-0.191076	0.57764	1.2185	0.82607	1.78183	0.1487
	County.13063	-0.372457	-0.59624	-0.155556	0.68904	0.550879	0.855939	0.0005
	County.13065	0.0617972	-0.260701	0.395072	1.06375	0.770512	1.48449	0.3525
	County.13067	-0.11751	-0.328798	0.0828704	0.889131	0.719788	1.0864	0.1301
	County.13069	-0.345948	-0.59671	-0.0862328	0.707549	0.55062	0.917381	0.0035
	County.13071	0.33114	0.0696628	0.592894	1.39255	1.07215	1.80922	0.0068
	County.13073	-0.091815	-0.330478	0.134058	0.912274	0.71858	1.14346	0.2163
	County.13075	-0.0534173	-0.349609	0.222841	0.947984	0.704964	1.24962	0.3603
	County.13077	-0.295478	-0.530126	-0.067851	0.744176	0.588531	0.9344	0.0062
	County.13079	0.172829	-0.120463	0.45154	1.18866	0.88651	1.57073	0.1189
	County.13081	0.111503	-0.160838	0.393987	1.11796	0.85143	1.48288	0.2155
	County.13083	0.0785194	-0.201976	0.366777	1.08168	0.817115	1.44308	0.2948
	County.13085	-0.201875	-0.476423	0.0665721	0.817197	0.621001	1.06884	0.0747
	County.13087	0.289957	0.0103487	0.574338	1.33637	1.0104	1.77595	0.0226
	County.13089	-0.143744	-0.346953	0.058022	0.866109	0.706839	1.05974	0.0829
	County.13091	0.0248175	-0.238026	0.292322	1.02513	0.788182	1.33953	0.4303
	County.13093	0.0722765	-0.24947	0.374694	1.07495	0.779214	1.45455	0.3188
	County.13095	-0.0490821	-0.289063	0.21008	0.952103	0.748965	1.23378	0.3514
	County.13097	-0.070576	-0.301472	0.148427	0.931857	0.739729	1.16001	0.2689
	County.13099	0.036095	-0.291785	0.335046	1.03675	0.746929	1.398	0.4108
	County.13101	-0.0494752	-0.449102	0.344226	0.951729	0.638201	1.4109	0.4047
	County.13103	-0.0350296	-0.294764	0.217706	0.965577	0.744707	1.24322	0.3936
	County.13105	-0.355952	-0.638415	-0.0777428	0.700506	0.528129	0.925202	0.0063
	County.13107	0.051291	-0.219647	0.322486	1.05263	0.802802	1.38056	0.351
	County.13109	0.142584	-0.161541	0.424875	1.15325	0.850831	1.5294	0.1732
	County.13111	0.0319672	-0.252903	0.304775	1.03248	0.776543	1.35632	0.4117
	County.13113	-0.0442952	-0.285182	0.179418	0.956671	0.751877	1.19652	0.3577
	County.13115	0.0859862	-0.138418	0.308856	1.08979	0.870735	1.36187	0.23
	County.13117	0.305861	0.0748759	0.525874	1.35779	1.07775	1.69194	0.0022
	County.13119	-0.0925606	-0.352978	0.169831	0.911594	0.702593	1.1851	0.2511
	County.13121	0.0574237	-0.14739	0.276942	1.0591	0.862957	1.31909	0.2987
	County.13123	0.0647493	-0.192502	0.330994	1.06689	0.824893	1.39235	0.3112
	County.13125	0.0289002	-0.313016	0.373267	1.02932	0.731238	1.45247	0.4414
	County.13127	0.0211036	-0.224799	0.286742	1.02133	0.798676	1.33208	0.4406
	County.13129	-0.0235527	-0.265238	0.218683	0.976723	0.767023	1.24444	0.4253
	County.13131	0.0749841	-0.201279	0.351519	1.07787	0.817684	1.42123	0.298
	County.13133	-0.207072	-0.509762	0.107017	0.812961	0.600638	1.11295	0.0928
	County.13135	0.132756	-0.0778448	0.350222	1.14197	0.925108	1.41938	0.1082
	County.13137	-0.173496	-0.428475	0.0746477	0.84072	0.651502	1.0775	0.0906
	County.13139	0.0746483	-0.147442	0.312307	1.07751	0.862913	1.36657	0.2601
	County.13141	-0.0601853	-0.370007	0.249038	0.94159	0.690729	1.28279	0.353
	County.13143	-0.021905	-0.270566	0.247358	0.978333	0.762948	1.28064	0.4346
	County.13145	0.0375791	-0.230928	0.308575	1.03829	0.793796	1.36148	0.396
	County.13147	-0.320185	-0.597564	-0.0379369	0.726015	0.55015	0.962774	0.0131
	County.13149	0.0810517	-0.215422	0.379248	1.08443	0.806201	1.46118	0.2925
	County.13151	-0.172802	-0.404551	0.0460731	0.841304	0.667276	1.04715	0.0658
	County.13153	0.264866	0.0152953	0.499302	1.30326	1.01541	1.64757	0.016
	County.13155	0.310317	0.000817117	0.593519	1.36386	1.00082	1.81035	0.0207
	County.13157	-0.123902	-0.380123	0.117413	0.883467	0.683778	1.12458	0.1615
	County.13159	-0.0922332	-0.361024	0.20345	0.911893	0.696962	1.22562	0.2631
	County.13161	-0.173327	-0.470861	0.119739	0.840862	0.624464	1.1272	0.1252
	County.13163	-0.0943184	-0.395418	0.19713	0.909993	0.673399	1.2179	0.268
	County.13165	0.051376	-0.27827	0.381002	1.05272	0.757093	1.46375	0.3848
	County.13167	0.38339	0.0966096	0.679098	1.46725	1.10143	1.9721	0.0052
	County.13169	0.218505	-0.0358898	0.475556	1.24422	0.964747	1.60891	0.0505
	County.13171	0.0888808	-0.192313	0.354316	1.09295	0.825048	1.42521	0.2622
	County.13173	-0.118263	-0.435078	0.207131	0.888462	0.647214	1.23014	0.2404
	County.13175	-0.00308616	-0.240265	0.24038	0.996919	0.78642	1.27173	0.4873
	County.13177	-0.0645131	-0.322919	0.198109	0.937524	0.724033	1.21909	0.3157
	County.13179	-0.0540728	-0.328334	0.215964	0.947363	0.720123	1.24106	0.354
	County.13181	-0.0730025	-0.384175	0.247674	0.929599	0.681013	1.28104	0.3208
	County.13183	0.337853	0.020478	0.665567	1.40193	1.02069	1.94559	0.0222
	County.13185	-0.130238	-0.374401	0.116432	0.877886	0.687701	1.12348	0.1536
	County.13187	0.155652	-0.111046	0.413635	1.16842	0.894898	1.51231	0.1229
	County.13189	-0.173114	-0.451012	0.113629	0.841042	0.636983	1.12034	0.1151
	County.13191	-0.0757863	-0.381325	0.233594	0.927014	0.682956	1.26313	0.3169
	County.13193	-0.262204	-0.552246	0.0534217	0.769354	0.575656	1.05487	0.0468
	County.13195	-0.186828	-0.428209	0.0863605	0.829586	0.651675	1.0902	0.0784
	County.13197	-0.0882591	-0.416786	0.230427	0.915524	0.659162	1.25914	0.2975
	County.13199	0.278911	0.0125197	0.554162	1.32169	1.0126	1.74048	0.0216
	County.13201	0.0342825	-0.286609	0.37782	1.03488	0.750805	1.4591	0.4245
	County.13205	0.188386	-0.0890016	0.462941	1.2073	0.914844	1.58874	0.0941
	County.13207	-0.0528063	-0.305545	0.210328	0.948564	0.736722	1.23408	0.3465
	County.13209	0.0333363	-0.26367	0.330277	1.0339	0.768227	1.39135	0.4135
	County.13211	-0.254507	-0.537413	0.0259743	0.775299	0.584258	1.02631	0.0381
	County.13213	0.0370741	-0.225681	0.306412	1.03777	0.797973	1.35854	0.3937
	County.13215	0.126327	-0.107426	0.356608	1.13465	0.898143	1.42848	0.1449
	County.13217	-0.106749	-0.340047	0.116142	0.898752	0.711737	1.12315	0.1803
	County.13219	-0.18391	-0.44682	0.0668786	0.832011	0.639659	1.06917	0.0799
	County.13221	-0.123467	-0.425628	0.197347	0.883851	0.653359	1.21817	0.215
	County.13223	0.0561351	-0.179779	0.274298	1.05774	0.835455	1.31561	0.3152
	County.13225	0.149265	-0.109394	0.406868	1.16098	0.896378	1.50211	0.127
	County.13227	0.00880075	-0.248471	0.276028	1.00884	0.779993	1.31788	0.4741
	County.13229	-0.15151	-0.428639	0.132538	0.859409	0.651395	1.14172	0.1459
	County.13231	-0.0231004	-0.292255	0.239084	0.977164	0.746578	1.27009	0.4321
	County.13233	0.238014	-0.00864956	0.471494	1.26873	0.991388	1.60239	0.0277
	County.13235	0.202766	-0.0857285	0.490223	1.22479	0.917843	1.63268	0.0835
	County.13237	0.0623692	-0.201802	0.32394	1.06436	0.817257	1.38256	0.3168
	County.13239	-0.0857029	-0.450679	0.320008	0.917867	0.637195	1.37714	0.327
	County.13241	-0.274299	-0.56025	0.0309192	0.760105	0.571066	1.0314	0.0369
	County.13243	-0.201807	-0.552561	0.125474	0.817252	0.575474	1.13369	0.1214
	County.13245	-0.181404	-0.418194	0.0629337	0.834098	0.658235	1.06496	0.0706
	County.13247	0.0478786	-0.174801	0.277604	1.04904	0.839624	1.31996	0.3408
	County.13249	-0.217341	-0.552408	0.116649	0.804655	0.575562	1.12372	0.0998
	County.13251	0.111043	-0.172064	0.38531	1.11744	0.841926	1.47007	0.2174
	County.13253	0.291258	-0.0186069	0.606984	1.33811	0.981565	1.83489	0.0369
	County.13255	-0.0210436	-0.248078	0.220779	0.979176	0.780299	1.24705	0.4285
	County.13257	0.0829853	-0.17949	0.334441	1.08653	0.835696	1.39716	0.2669
	County.13259	0.116172	-0.222697	0.460109	1.12319	0.800357	1.58425	0.2497
	County.13261	-0.0467669	-0.298791	0.211663	0.95431	0.741714	1.23573	0.368
	County.13263	0.165802	-0.153836	0.468398	1.18034	0.857412	1.59743	0.1512
	County.13265	-0.0323953	-0.404272	0.376472	0.968124	0.667462	1.45713	0.4342
	County.13267	0.285305	0.0302022	0.558363	1.33017	1.03066	1.74781	0.0162
	County.13269	-0.0624381	-0.376483	0.266835	0.939471	0.686271	1.30582	0.3551
	County.13271	0.0891677	-0.216473	0.379958	1.09326	0.805354	1.46222	0.2741
	County.13273	-0.11293	-0.421365	0.195748	0.893213	0.65615	1.21622	0.2393
	County.13275	0.171302	-0.0811907	0.417351	1.18685	0.922018	1.51794	0.0942
	County.13277	-0.143185	-0.385022	0.110573	0.866594	0.680436	1.11692	0.1292
	County.13279	0.0359487	-0.223335	0.277593	1.0366	0.799847	1.31995	0.3866
	County.13281	-0.166759	-0.481211	0.156824	0.846403	0.618034	1.16979	0.1606
	County.13283	0.12247	-0.190696	0.448977	1.13028	0.826384	1.56671	0.223
	County.13285	-0.151108	-0.403877	0.106505	0.859755	0.667726	1.11238	0.1208
	County.13287	0.0838744	-0.226608	0.408153	1.08749	0.797233	1.50404	0.3016
	County.13289	0.0850987	-0.228189	0.405854	1.08882	0.795974	1.50058	0.2921
	County.13291	-0.0148663	-0.286566	0.266212	0.985244	0.750838	1.30501	0.4616
	County.13293	0.0370691	-0.224616	0.293277	1.03776	0.798823	1.34081	0.3846
	County.13295	-0.09119	-0.327316	0.152265	0.912844	0.720856	1.16447	0.2365
	County.13297	-0.170084	-0.410566	0.07199	0.843594	0.663275	1.07464	0.084
	County.13299	-0.18293	-0.425332	0.0868738	0.832826	0.653553	1.09076	0.0807
	County.13301	0.0115585	-0.321231	0.3596	1.01163	0.725256	1.43276	0.4703
	County.13303	0.237751	-0.0301394	0.484517	1.26839	0.97031	1.62339	0.0365
	County.13305	0.15127	-0.122925	0.425584	1.16331	0.88433	1.53048	0.1403
	County.13307	-0.0854109	-0.455715	0.27196	0.918135	0.633995	1.31253	0.3237
	County.13309	-0.00961284	-0.344174	0.298929	0.990433	0.708806	1.34841	0.4746
	County.13311	0.0271682	-0.234831	0.286473	1.02754	0.790705	1.33172	0.4183
	County.13313	-0.185176	-0.426205	0.0643296	0.830958	0.652982	1.06644	0.0717
	County.13315	0.113184	-0.190997	0.418767	1.11984	0.826135	1.52009	0.2319
	County.13317	-0.00745287	-0.319028	0.312905	0.992575	0.726855	1.36739	0.4764
	County.13319	0.463991	0.185905	0.75074	1.59041	1.20431	2.11857	0.0009
	County.13321	-0.00599615	-0.283515	0.283991	0.994022	0.753132	1.32842	0.4875
	County.16001	0.260655	0.00721646	0.519839	1.29778	1.00724	1.68176	0.0223
	County.16003	-0.0593128	-0.462808	0.379412	0.942412	0.629514	1.46142	0.396
	County.16005	0.0120486	-0.276432	0.282493	1.01212	0.758485	1.32643	0.4653
	County.16007	0.059976	-0.289316	0.410482	1.06181	0.748776	1.50754	0.3685
	County.16009	-0.0541636	-0.448231	0.340641	0.947277	0.638757	1.40585	0.3944
	County.16011	0.062218	-0.244102	0.384983	1.06419	0.783408	1.46959	0.3458
	County.16013	0.133943	-0.195495	0.493637	1.14333	0.822427	1.63826	0.2218
	County.16015	0.143999	-0.234134	0.54193	1.15488	0.791256	1.71932	0.2319
	County.16017	-0.267047	-0.592329	0.0794315	0.765637	0.553038	1.08267	0.0585
	County.16019	0.0072612	-0.26914	0.28672	1.00729	0.764036	1.33205	0.4753
	County.16021	-0.0335819	-0.423536	0.328222	0.966976	0.654728	1.3885	0.4306
	County.16023	-0.0488148	-0.459683	0.363729	0.952357	0.631484	1.43868	0.4118
	County.16025	-0.0186442	-0.443605	0.388587	0.981528	0.641719	1.4749	0.466
	County.16027	0.281168	0.011114	0.554387	1.32468	1.01118	1.74087	0.023
	County.16029	-0.00282997	-0.337718	0.345071	0.997174	0.713397	1.41209	0.4926
	County.16031	-0.0789843	-0.407994	0.225045	0.924054	0.664983	1.25238	0.3134
	County.16033	-0.00120168	-0.435656	0.400048	0.998799	0.64684	1.4919	0.4964
	County.16035	-0.0413502	-0.436081	0.342138	0.959493	0.646565	1.40795	0.4196
	County.16037	-0.00304915	-0.415439	0.410155	0.996955	0.66005	1.50705	0.4977
	County.16039	-0.127413	-0.466202	0.20439	0.88037	0.627381	1.22678	0.2286
	County.16041	-0.201902	-0.534985	0.142521	0.817175	0.585678	1.15318	0.1211
	County.16043	0.155944	-0.205227	0.559886	1.16876	0.814463	1.75047	0.2055
	County.16045	-0.0144649	-0.338446	0.324361	0.985639	0.712877	1.38315	0.4715
	County.16047	-0.112271	-0.492908	0.262278	0.893802	0.610847	1.29989	0.2786
	County.16049	-0.06112	-0.453368	0.303426	0.94071	0.635484	1.35449	0.3831
	County.16051	0.0112293	-0.314254	0.339051	1.01129	0.730333	1.40361	0.4771
	County.16053	0.374693	0.051396	0.703715	1.45455	1.05274	2.02125	0.0132
	County.16055	-0.06969	-0.342093	0.215874	0.932683	0.710282	1.24095	0.3136
	County.16057	0.00036368	-0.341822	0.342464	1.00036	0.710475	1.40841	0.4973
	County.16059	-0.158545	-0.536944	0.210664	0.853384	0.584532	1.2345	0.208
	County.16061	-0.0995271	-0.497106	0.292756	0.905265	0.608289	1.34012	0.3089
	County.16063	0.0382821	-0.363305	0.464096	1.03902	0.695375	1.59058	0.4242
	County.16065	-0.173505	-0.521185	0.16757	0.840713	0.593816	1.18243	0.1625
	County.16067	-0.0646025	-0.38092	0.275323	0.93744	0.683233	1.31696	0.3524
	County.16069	-0.0942765	-0.426233	0.223341	0.910031	0.652964	1.25025	0.2835
	County.16071	0.0478817	-0.342	0.415254	1.04905	0.710348	1.51475	0.4014
	County.16073	0.0543067	-0.298009	0.385666	1.05581	0.742295	1.47059	0.3785
	County.16075	0.0718011	-0.222896	0.392376	1.07444	0.800198	1.48049	0.3186
	County.16077	-0.0158244	-0.389139	0.375905	0.9843	0.67764	1.45631	0.4692
	County.16079	0.0449017	-0.296839	0.381859	1.04593	0.743164	1.46501	0.395
	County.16081	-0.0857896	-0.459814	0.286843	0.917787	0.631401	1.33221	0.3274
	County.16083	0.16241	-0.120511	0.457266	1.17634	0.886467	1.57975	0.1359
	County.16085	0.140488	-0.221545	0.541052	1.15083	0.80128	1.71781	0.2358
	County.16087	0.0212591	-0.344128	0.35959	1.02149	0.708838	1.43274	0.4495
	County.17001	-0.28569	-0.537052	-0.0141589	0.751495	0.584469	0.985941	0.0153
	County.17003	-0.160463	-0.546159	0.195216	0.851749	0.57917	1.21557	0.1966
	County.17005	-0.0410812	-0.327949	0.252055	0.959751	0.7204	1.28667	0.3892
	County.17007	0.128546	-0.119382	0.391889	1.13717	0.887469	1.47977	0.1637
	County.17009	0.0856989	-0.23989	0.425541	1.08948	0.786715	1.53042	0.3104
	County.17011	-0.00891643	-0.2845	0.258033	0.991123	0.75239	1.29438	0.4715
	County.17013	-0.080281	-0.442415	0.281385	0.922857	0.642483	1.32496	0.3306
	County.17015	0.130796	-0.14649	0.433961	1.13974	0.863734	1.54336	0.1875
	County.17017	-0.29515	-0.604383	-0.00894321	0.74442	0.546412	0.991097	0.0245
	County.17019	-0.0301287	-0.283203	0.211985	0.970321	0.753367	1.23613	0.4101
	County.17021	0.216564	-0.041241	0.486554	1.2418	0.959598	1.6267	0.0574
	County.17023	-0.0361038	-0.309993	0.24007	0.96454	0.733452	1.27134	0.3984
	County.17025	-0.109017	-0.40448	0.193272	0.896715	0.667324	1.21321	0.2373
	County.17027	-0.275479	-0.579391	0.00794162	0.759209	0.560239	1.00797	0.0328
	County.17029	-0.204845	-0.479915	0.0531121	0.814773	0.618836	1.05455	0.0682
	County.17031	-0.0614054	-0.275064	0.147852	0.940442	0.759524	1.15934	0.2857
	County.17033	0.108471	-0.176893	0.387101	1.11457	0.837869	1.4727	0.225
	County.17035	-0.0728156	-0.393987	0.239471	0.929772	0.674363	1.27058	0.3307
	County.17037	0.222577	-0.0372051	0.483947	1.24929	0.963479	1.62247	0.0478
	County.17039	0.352733	0.0876539	0.634447	1.42295	1.09161	1.88598	0.0065
	County.17041	0.196811	-0.102874	0.515435	1.21751	0.90224	1.67437	0.1055
	County.17043	-0.0933018	-0.301053	0.115826	0.910919	0.740038	1.1228	0.1858
	County.17045	-0.0377279	-0.321466	0.255649	0.962975	0.725086	1.2913	0.3976
	County.17047	0.0029291	-0.300938	0.330226	1.00293	0.740124	1.39128	0.4887
	County.17049	-0.351466	-0.637104	-0.077372	0.703656	0.528822	0.925545	0.0064
	County.17051	0.110982	-0.19201	0.412056	1.11737	0.825299	1.50992	0.2329
	County.17053	0.202174	-0.0907531	0.509757	1.22406	0.913243	1.66489	0.0971
	County.17055	0.0316545	-0.238121	0.30146	1.03216	0.788107	1.35183	0.4073
	County.17057	0.108917	-0.157455	0.375352	1.11507	0.854315	1.4555	0.2131
	County.17059	-0.149117	-0.476073	0.196091	0.861468	0.621218	1.21664	0.1903
	County.17061	0.004593	-0.296568	0.320958	1.0046	0.743365	1.37845	0.4876
	County.17063	0.249951	-0.0172147	0.496692	1.28396	0.982933	1.64328	0.0303
	County.17065	-0.0823561	-0.411518	0.252551	0.920944	0.662644	1.28731	0.3083
	County.17067	-0.150852	-0.44547	0.144543	0.859975	0.640523	1.15551	0.1673
	County.17069	-0.0724995	-0.433331	0.279075	0.930066	0.648346	1.32191	0.3476
	County.17071	-0.11409	-0.451179	0.229537	0.892178	0.636877	1.25802	0.2661
	County.17073	0.17674	-0.0891724	0.425481	1.19332	0.914688	1.53033	0.0955
	County.17075	0.291644	0.00629405	0.577308	1.33863	1.00631	1.78124	0.0227
	County.17077	-0.051403	-0.326628	0.217114	0.949896	0.721352	1.24249	0.3548
	County.17079	-0.154544	-0.468473	0.173116	0.856806	0.625957	1.189	0.1728
	County.17081	0.109558	-0.16018	0.386424	1.11578	0.85199	1.47171	0.2184
	County.17083	-0.213208	-0.516814	0.0773274	0.807988	0.596418	1.0804	0.082
	County.17085	0.102808	-0.20531	0.401795	1.10828	0.814395	1.4945	0.2514
	County.17087	0.0291238	-0.296569	0.359448	1.02955	0.743364	1.43254	0.4291
	County.17089	0.274447	0.0639453	0.499248	1.3158	1.06603	1.64748	0.0064
	County.17091	0.067319	-0.197929	0.315279	1.06964	0.820428	1.37064	0.3064
	County.17093	0.0227515	-0.203838	0.264324	1.02301	0.815594	1.30255	0.4252
	County.17095	-0.242485	-0.506754	0.0300237	0.784676	0.602448	1.03048	0.0403
	County.17097	-0.130488	-0.366924	0.1085	0.877667	0.692862	1.1146	0.1406
	County.17099	-0.248762	-0.489687	0.00110545	0.779766	0.612818	1.00111	0.024
	County.17101	-0.106441	-0.405403	0.189056	0.899028	0.666708	1.20811	0.2434
	County.17103	0.0846912	-0.178652	0.358357	1.08838	0.836397	1.43098	0.2691
	County.17105	0.06522	-0.201697	0.352457	1.06739	0.817343	1.42256	0.3236
	County.17107	-0.105004	-0.369003	0.182724	0.900321	0.691423	1.20048	0.229
	County.17109	0.0942753	-0.177937	0.397661	1.09886	0.836995	1.48834	0.2639
	County.17111	0.114409	-0.126486	0.347758	1.12121	0.881187	1.41589	0.1745
	County.17113	-0.157644	-0.395508	0.0680553	0.854154	0.673338	1.07042	0.094
	County.17115	0.0819641	-0.155333	0.318313	1.08542	0.85613	1.37481	0.2562
	County.17117	-0.174509	-0.439091	0.0904977	0.83987	0.644622	1.09472	0.1015
	County.17119	0.0550967	-0.178515	0.276058	1.05664	0.836512	1.31792	0.319
	County.17121	0.114228	-0.162267	0.389805	1.12101	0.850215	1.47669	0.2079
	County.17123	-0.233171	-0.523995	0.0686079	0.792018	0.59215	1.07102	0.0643
	County.17125	-0.0085881	-0.313187	0.267244	0.991449	0.731113	1.30636	0.4779
	County.17127	-0.205496	-0.505411	0.103486	0.814243	0.603258	1.10903	0.0944
	County.17129	0.0465284	-0.258465	0.351387	1.04763	0.772236	1.42104	0.3829
	County.17131	0.158795	-0.124971	0.443195	1.1721	0.882523	1.55768	0.14
	County.17133	0.13504	-0.136011	0.416193	1.14458	0.872833	1.51618	0.1683
	County.17135	-0.0995908	-0.363258	0.168955	0.905208	0.695407	1.18407	0.2343
	County.17137	-0.246547	-0.521757	0.0203872	0.781494	0.593477	1.0206	0.0384
	County.17139	0.3488	0.0670889	0.626729	1.41737	1.06939	1.87148	0.0079
	County.17141	0.0803967	-0.185902	0.346666	1.08372	0.830355	1.41434	0.2749
	County.17143	0.0180791	-0.214877	0.237822	1.01824	0.80664	1.26848	0.4368
	County.17145	-0.228948	-0.532954	0.0836846	0.79537	0.586869	1.08729	0.0745
	County.17147	0.13927	-0.156612	0.433652	1.14943	0.855036	1.54288	0.1814
	County.17149	-0.0843575	-0.399966	0.211796	0.919103	0.670343	1.2359	0.2979
	County.17151	-0.0612605	-0.433096	0.307963	0.940578	0.648498	1.36065	0.3748
	County.17153	-0.110234	-0.461298	0.241614	0.895625	0.630465	1.2733	0.2799
	County.17155	-0.0219796	-0.353383	0.285342	0.97826	0.702308	1.33022	0.4522
	County.17157	-0.0378003	-0.319186	0.254334	0.962905	0.72674	1.2896	0.3991
	County.17159	-0.23135	-0.514179	0.0597148	0.793461	0.597991	1.06153	0.0582
	County.17161	0.218981	0.00294358	0.440063	1.24481	1.00295	1.5528	0.0252
	County.17163	-0.0057514	-0.230011	0.23116	0.994265	0.794525	1.26006	0.4787
	County.17165	0.117864	-0.173868	0.389501	1.12509	0.840408	1.47624	0.2073
	County.17167	-0.0558709	-0.306701	0.172281	0.945661	0.73587	1.18801	0.3217
	County.17169	-0.018859	-0.351168	0.303024	0.981318	0.703866	1.35395	0.457
	County.17171	0.128044	-0.219096	0.493769	1.1366	0.803244	1.63848	0.2461
	County.17173	-0.0242226	-0.331777	0.261648	0.976068	0.717648	1.29907	0.4415
	County.17175	0.00797406	-0.340796	0.340113	1.00801	0.711204	1.40511	0.4749
	County.17177	0.0649255	-0.198772	0.32388	1.06708	0.819737	1.38248	0.3108
	County.17179	0.0851668	-0.166567	0.33685	1.0889	0.846566	1.40053	0.2497
	County.17181	-0.0835376	-0.387218	0.223516	0.919857	0.678943	1.25047	0.2975
	County.17183	0.387821	0.142659	0.649642	1.47377	1.15334	1.91485	0.0013
	County.17185	0.178473	-0.0978226	0.483142	1.19539	0.90681	1.62116	0.1112
	County.17187	-0.132322	-0.437804	0.170328	0.876059	0.645452	1.18569	0.1985
	County.17189	0.404639	0.107329	0.69264	1.49876	1.1133	1.99899	0.0034
	County.17191	-0.0348387	-0.337318	0.25256	0.965761	0.713682	1.28732	0.4066
	County.17193	-0.166552	-0.456236	0.126086	0.846578	0.633665	1.13438	0.1292
	County.17195	-0.118566	-0.387801	0.132579	0.888193	0.678547	1.14177	0.1868
	County.17197	-0.0163605	-0.239434	0.190468	0.983773	0.787073	1.20982	0.4434
	County.17199	0.0367729	-0.219712	0.292252	1.03746	0.80275	1.33944	0.3857
	County.17201	0.206112	-0.0358765	0.444901	1.22889	0.964759	1.56034	0.0504
	County.17203	0.00550702	-0.259773	0.278453	1.00552	0.771227	1.32108	0.4812
	County.18001	0.117431	-0.141501	0.370537	1.1246	0.868054	1.44851	0.1853
	County.18003	0.138477	-0.0885511	0.361955	1.14852	0.915256	1.43613	0.1152
	County.18005	0.437163	0.216755	0.66761	1.54831	1.24204	1.94957	1e-05
	County.18007	0.0704539	-0.230582	0.36706	1.073	0.794071	1.44348	0.3222
	County.18009	0.082814	-0.213699	0.369936	1.08634	0.807592	1.44764	0.2907
	County.18011	-0.0540443	-0.289522	0.188331	0.94739	0.748622	1.20723	0.3295
	County.18013	0.362804	0.0693045	0.651109	1.43735	1.07176	1.91767	0.0074
	County.18015	-0.00270003	-0.292469	0.278586	0.997304	0.746418	1.32126	0.4919
	County.18017	-0.177569	-0.435005	0.0855392	0.837303	0.647261	1.0893	0.0922
	County.18019	0.0671986	-0.168551	0.292337	1.06951	0.844888	1.33955	0.2835
	County.18021	0.0350391	-0.223416	0.279784	1.03566	0.799782	1.32284	0.3952
	County.18023	0.03168	-0.230936	0.294311	1.03219	0.79379	1.3422	0.4024
	County.18025	0.172858	-0.11499	0.471504	1.1887	0.891375	1.6024	0.1271
	County.18027	0.0989309	-0.165011	0.372968	1.10399	0.847885	1.45204	0.2371
	County.18029	-0.0349863	-0.290998	0.238119	0.965619	0.747517	1.26886	0.3959
	County.18031	-0.0570288	-0.318554	0.206027	0.944567	0.7272	1.22879	0.3332
	County.18033	0.00466334	-0.258688	0.258052	1.00467	0.772064	1.29441	0.489
	County.18035	0.0885775	-0.161542	0.336704	1.09262	0.850831	1.40032	0.2384
	County.18037	-0.149363	-0.409435	0.117734	0.861257	0.664025	1.12494	0.1313
	County.18039	-0.253993	-0.491118	-0.0271598	0.775697	0.611942	0.973206	0.0171
	County.18041	-0.144778	-0.404364	0.122493	0.865214	0.667401	1.13031	0.1396
	County.18043	0.150315	-0.086784	0.401016	1.1622	0.916875	1.49334	0.1119
	County.18045	0.00234111	-0.267037	0.274271	1.00234	0.765645	1.31557	0.4894
	County.18047	-0.137893	-0.430041	0.142914	0.871192	0.650482	1.15363	0.1739
	County.18049	0.0309137	-0.239762	0.313381	1.0314	0.786815	1.36804	0.4147
	County.18051	0.115679	-0.13335	0.371808	1.12264	0.875158	1.45035	0.183
	County.18053	-0.139637	-0.367282	0.0928285	0.869674	0.692614	1.09727	0.1177
	County.18055	-0.000536593	-0.251333	0.267139	0.999464	0.777764	1.30622	0.5001
	County.18057	-0.123522	-0.370294	0.0991259	0.883803	0.690531	1.10421	0.1457
	County.18059	0.0746929	-0.179898	0.311332	1.07755	0.835355	1.36524	0.2739
	County.18061	-0.246275	-0.511005	0.0102075	0.781707	0.599893	1.01026	0.031
	County.18063	0.0746582	-0.165152	0.308126	1.07752	0.847764	1.36087	0.2674
	County.18065	0.0524057	-0.195653	0.292638	1.0538	0.822297	1.33996	0.3281
	County.18067	0.233332	-0.00234776	0.486433	1.2628	0.997655	1.6265	0.0326
	County.18069	-0.00547355	-0.23984	0.243713	0.994541	0.786754	1.27598	0.4808
	County.18071	0.0539387	-0.196178	0.284822	1.05542	0.821866	1.32953	0.3287
	County.18073	0.0232387	-0.248	0.299309	1.02351	0.78036	1.34893	0.4378
	County.18075	-0.0577878	-0.328058	0.2077	0.94385	0.720321	1.23084	0.3382
	County.18077	-0.00660638	-0.270431	0.257928	0.993415	0.76305	1.29425	0.4775
	County.18079	0.299	0.0375076	0.558372	1.34851	1.03822	1.74782	0.0129
	County.18081	-0.090616	-0.321556	0.139553	0.913368	0.72502	1.14976	0.2239
	County.18083	-0.153364	-0.405301	0.0992848	0.857818	0.666776	1.10438	0.1189
	County.18085	-0.168947	-0.409652	0.0935356	0.844554	0.663881	1.09805	0.0939
	County.18087	-0.351005	-0.631823	-0.0638313	0.70398	0.531622	0.938163	0.0078
	County.18089	0.223425	-0.00429522	0.446552	1.25035	0.995714	1.56291	0.0268
	County.18091	-0.0175778	-0.261369	0.212742	0.982576	0.769997	1.23707	0.4455
	County.18093	0.30193	0.0649157	0.554264	1.35247	1.06707	1.74066	0.0073
	County.18095	0.174066	-0.0553568	0.421516	1.19013	0.946147	1.52427	0.0739
	County.18097	-0.277717	-0.480262	-0.062178	0.757511	0.618622	0.939716	0.0048
	County.18099	0.0030655	-0.23928	0.25325	1.00307	0.787194	1.28821	0.4916
	County.18101	-0.0672789	-0.396146	0.244335	0.934934	0.672908	1.27677	0.3404
	County.18103	0.151434	-0.0988037	0.400646	1.1635	0.905921	1.49279	0.1193
	County.18105	0.0734003	-0.14701	0.311425	1.07616	0.863286	1.36537	0.2659
	County.18107	-0.025429	-0.276067	0.227973	0.974892	0.758762	1.25605	0.4198
	County.18109	0.0382177	-0.196048	0.273389	1.03896	0.821973	1.31441	0.374
	County.18111	0.175018	-0.111054	0.485542	1.19127	0.894891	1.62506	0.1265
	County.18113	-0.205936	-0.465521	0.0623596	0.813885	0.627808	1.06434	0.0638
	County.18115	-0.0661674	-0.397568	0.273733	0.935974	0.671953	1.31486	0.3473
	County.18117	0.0436219	-0.255409	0.323116	1.04459	0.7746	1.38142	0.3869
	County.18119	0.103796	-0.16856	0.372007	1.10937	0.84488	1.45064	0.2296
	County.18121	-0.00945524	-0.290139	0.27363	0.990589	0.748159	1.31473	0.4708
	County.18123	-0.167506	-0.46275	0.122559	0.845771	0.62955	1.13039	0.1317
	County.18125	-0.104415	-0.38655	0.184707	0.900851	0.679397	1.20287	0.234
	County.18127	-0.110639	-0.340464	0.134235	0.895262	0.71144	1.14366	0.1812
	County.18129	-0.0418515	-0.302052	0.232276	0.959012	0.7393	1.26147	0.3785
	County.18131	-0.062261	-0.354769	0.242262	0.939638	0.701335	1.27413	0.3407
	County.18133	0.13255	-0.130124	0.399936	1.14174	0.877987	1.49173	0.163
	County.18135	-0.15361	-0.434201	0.114549	0.857607	0.647782	1.12137	0.134
	County.18137	-0.0376798	-0.297314	0.237083	0.963021	0.742811	1.26755	0.3928
	County.18139	-0.13149	-0.419377	0.153747	0.876788	0.657456	1.1662	0.1855
	County.18141	-0.156966	-0.37063	0.0768406	0.854733	0.6903	1.07987	0.0848
	County.18143	0.0235007	-0.239533	0.272867	1.02378	0.786995	1.31373	0.4278
	County.18145	-0.00166081	-0.261246	0.250297	0.998341	0.770091	1.28441	0.4906
	County.18147	0.0686922	-0.192383	0.350534	1.07111	0.824991	1.41983	0.3134
	County.18149	0.0480337	-0.229537	0.316438	1.04921	0.794901	1.37223	0.3685
	County.18151	0.0298641	-0.213338	0.300552	1.03031	0.807883	1.3506	0.4085
	County.18153	-0.0613403	-0.319771	0.211257	0.940503	0.726315	1.23523	0.3255
	County.18155	-0.203773	-0.534122	0.132378	0.815647	0.586184	1.14154	0.1179
	County.18157	0.159466	-0.0813342	0.378723	1.17288	0.921886	1.46042	0.0852
	County.18159	0.0113399	-0.267113	0.290205	1.0114	0.765587	1.3367	0.4716
	County.18161	-0.0028722	-0.329419	0.315544	0.997132	0.719341	1.371	0.4982
	County.18163	-0.0983792	-0.317441	0.121353	0.906305	0.72801	1.12902	0.1937
	County.18165	-0.10259	-0.382492	0.180084	0.902497	0.682159	1.19732	0.2398
	County.18167	-0.14536	-0.389582	0.0819652	0.864711	0.67734	1.08542	0.1125
	County.18169	-0.0236797	-0.284928	0.235525	0.976598	0.752069	1.26557	0.4278
	County.18171	0.13859	-0.205038	0.44584	1.14865	0.814616	1.5618	0.2004
	County.18173	0.0343199	-0.216244	0.282519	1.03492	0.805539	1.32647	0.3946
	County.18175	-0.165821	-0.43522	0.102241	0.847198	0.647122	1.10765	0.1168
	County.18177	-0.0914386	-0.343304	0.172416	0.912617	0.709422	1.18817	0.2435
	County.18179	0.101847	-0.15033	0.375832	1.10721	0.860424	1.4562	0.2185
	County.18181	0.0666314	-0.198779	0.339116	1.0689	0.819731	1.40371	0.3107
	County.18183	0.0367489	-0.22609	0.276245	1.03743	0.797646	1.31817	0.3892
	County.19001	-0.168713	-0.507603	0.186842	0.844751	0.601937	1.20544	0.1718
	County.19003	0.0322052	-0.333054	0.387014	1.03273	0.716732	1.47258	0.4326
	County.19005	-0.13834	-0.47947	0.204033	0.870802	0.619112	1.22634	0.2111
	County.19007	-0.156643	-0.482769	0.172485	0.855009	0.617072	1.18825	0.174
	County.19009	0.148158	-0.206377	0.490234	1.1597	0.813526	1.6327	0.2032
	County.19011	-0.0310076	-0.314577	0.245287	0.969468	0.730098	1.27799	0.4153
	County.19013	0.0817647	-0.159456	0.334835	1.0852	0.852607	1.39771	0.2584
	County.19015	-0.0941612	-0.365107	0.202414	0.910136	0.694123	1.22435	0.2585
	County.19017	-0.0222932	-0.295332	0.266423	0.977953	0.744284	1.30529	0.4433
	County.19019	0.0759603	-0.209666	0.344825	1.07892	0.810855	1.41174	0.298
	County.19021	0.0998551	-0.172894	0.401548	1.10501	0.841226	1.49414	0.2457
	County.19023	0.123239	-0.153287	0.423696	1.13115	0.857883	1.5276	0.2024
	County.19025	0.0191026	-0.305784	0.339223	1.01929	0.736546	1.40386	0.4549
	County.19027	-0.0972968	-0.390469	0.198482	0.907287	0.67674	1.21955	0.2587
	County.19029	0.116639	-0.184004	0.41721	1.12371	0.831932	1.51772	0.219
	County.19031	-0.149099	-0.453769	0.155279	0.861484	0.635229	1.16798	0.1684
	County.19033	0.149235	-0.11329	0.424307	1.16095	0.892891	1.52853	0.135
	County.19035	0.264606	-0.0228693	0.585579	1.30292	0.97739	1.79603	0.0421
	County.19037	-0.183684	-0.512886	0.125924	0.832199	0.598765	1.1342	0.1319
	County.19039	0.209435	-0.131547	0.526325	1.23298	0.876738	1.6927	0.1051
	County.19041	0.159987	-0.136798	0.457365	1.1735	0.872146	1.5799	0.15
	County.19043	-0.368847	-0.684494	-0.0381506	0.691531	0.504345	0.962568	0.0109
	County.19045	-0.00153585	-0.25964	0.260014	0.998465	0.771329	1.29695	0.4919
	County.19047	-0.0784256	-0.384908	0.219139	0.924571	0.680513	1.245	0.3104
	County.19049	-0.194261	-0.470245	0.073901	0.823443	0.624849	1.0767	0.0819
	County.19051	0.0118198	-0.345844	0.370481	1.01189	0.707623	1.44843	0.4668
	County.19053	0.123599	-0.224669	0.466017	1.13156	0.798781	1.59363	0.2346
	County.19055	0.0113933	-0.297777	0.314424	1.01146	0.742467	1.36947	0.4675
	County.19057	-0.0890305	-0.350748	0.187362	0.914818	0.704161	1.20606	0.2635
	County.19059	-0.0502268	-0.356324	0.271452	0.951014	0.700246	1.31187	0.378
	County.19061	-0.129269	-0.387033	0.131586	0.878738	0.679069	1.14064	0.1624
	County.19063	0.177603	-0.177014	0.523563	1.19435	0.837768	1.68803	0.16
	County.19065	0.223642	-0.0614977	0.524424	1.25062	0.940355	1.68949	0.0714
	County.19067	-0.17116	-0.465748	0.151616	0.842687	0.627665	1.16371	0.1339
	County.19069	0.0340398	-0.300249	0.35797	1.03463	0.740634	1.43042	0.4198
	County.19071	0.276415	-0.0637862	0.614671	1.3184	0.938206	1.84905	0.0554
	County.19073	0.0913589	-0.22334	0.426211	1.09566	0.799843	1.53144	0.289
	County.19075	0.317634	0.020923	0.61698	1.37387	1.02114	1.85332	0.0205
	County.19077	0.0633667	-0.273724	0.378451	1.06542	0.760542	1.46002	0.3522
	County.19079	0.00701781	-0.29375	0.302676	1.00704	0.745463	1.35348	0.4785
	County.19081	-0.192653	-0.538111	0.144581	0.824768	0.58385	1.15556	0.1333
	County.19083	-0.0957851	-0.387216	0.195596	0.908659	0.678944	1.21604	0.2541
	County.19085	-0.0888499	-0.395403	0.22	0.914983	0.673409	1.24608	0.2879
	County.19087	-0.0774984	-0.355278	0.199839	0.925428	0.700978	1.22121	0.289
	County.19089	-0.151238	-0.480033	0.170676	0.859643	0.618763	1.18611	0.1824
	County.19091	0.0622408	-0.267146	0.373522	1.06422	0.765561	1.45284	0.3533
	County.19093	0.260421	-0.0829375	0.588356	1.29748	0.920409	1.80102	0.0651
	County.19095	-0.0142322	-0.31864	0.287605	0.985869	0.727137	1.33323	0.4672
	County.19097	-0.0401946	-0.346293	0.274342	0.960602	0.707305	1.31567	0.3968
	County.19099	0.0667003	-0.206165	0.340098	1.06898	0.813699	1.40509	0.3133
	County.19101	0.190431	-0.109169	0.4877	1.20977	0.896578	1.62857	0.1039
	County.19103	-0.0478225	-0.285317	0.176794	0.953303	0.751776	1.19338	0.3444
	County.19105	-0.114144	-0.401441	0.182464	0.89213	0.669355	1.20017	0.2245
	County.19107	-0.127248	-0.455242	0.184279	0.880516	0.634295	1.20235	0.216
	County.19109	0.0135591	-0.305966	0.32173	1.01365	0.736412	1.37951	0.4584
	County.19111	0.150202	-0.121131	0.420982	1.16207	0.885918	1.52346	0.1389
	County.19113	-0.201002	-0.434401	0.037833	0.817911	0.647652	1.03856	0.0493
	County.19115	-0.0323759	-0.335773	0.283854	0.968143	0.714785	1.32824	0.4241
	County.19117	0.0685626	-0.262945	0.395427	1.07097	0.768784	1.48502	0.3361
	County.19119	-0.112208	-0.481039	0.205022	0.893859	0.618141	1.22755	0.2667
	County.19121	-0.116881	-0.425488	0.17542	0.889691	0.653451	1.19175	0.2281
	County.19123	-0.0289974	-0.31013	0.258093	0.971419	0.733352	1.29446	0.4171
	County.19125	-0.0481469	-0.317087	0.204901	0.952994	0.728267	1.2274	0.365
	County.19127	0.0931165	-0.152117	0.374215	1.09759	0.858888	1.45385	0.243
	County.19129	0.200222	-0.0831522	0.509211	1.22167	0.920211	1.66398	0.0931
	County.19131	-0.212498	-0.543253	0.144654	0.808562	0.580855	1.15564	0.1129
	County.19133	-0.146065	-0.481823	0.185331	0.864102	0.617656	1.20362	0.1905
	County.19135	0.012416	-0.337003	0.333276	1.01249	0.713906	1.39553	0.4723
	County.19137	0.145622	-0.149694	0.431947	1.15676	0.860971	1.54025	0.1651
	County.19139	-0.153272	-0.415599	0.124504	0.857896	0.659945	1.13259	0.1359
	County.19141	0.014219	-0.324679	0.31352	1.01432	0.722759	1.36823	0.4646
	County.19143	-0.105242	-0.465305	0.233675	0.900107	0.627943	1.26323	0.2805
	County.19145	0.3131	0.0439984	0.600566	1.36766	1.04498	1.82315	0.0141
	County.19147	0.16712	-0.147797	0.485587	1.1819	0.862606	1.62513	0.1598
	County.19149	-0.172306	-0.449979	0.10889	0.841721	0.637642	1.11504	0.1127
	County.19151	0.17404	-0.155379	0.511318	1.1901	0.856091	1.66749	0.157
	County.19153	-0.152022	-0.377274	0.0671005	0.858969	0.685728	1.0694	0.0905
	County.19155	0.219195	-0.034987	0.475554	1.24507	0.965618	1.60891	0.0453
	County.19157	-0.0484755	-0.342704	0.245464	0.952681	0.709848	1.27821	0.3806
	County.19159	0.0957066	-0.252022	0.45033	1.10044	0.777227	1.56883	0.3015
	County.19161	0.0264569	-0.295767	0.33625	1.02681	0.743961	1.39969	0.438
	County.19163	0.0751428	-0.156028	0.327058	1.07804	0.855535	1.38688	0.2706
	County.19165	0.152537	-0.16641	0.470825	1.16479	0.846699	1.60131	0.1742
	County.19167	-0.286043	-0.567619	0.0273317	0.75123	0.566874	1.02771	0.0303
	County.19169	-0.276131	-0.545042	-0.0260656	0.758714	0.579817	0.974271	0.0191
	County.19171	-0.0853793	-0.370621	0.205744	0.918164	0.690305	1.22844	0.2858
	County.19173	0.364939	0.023291	0.68887	1.44043	1.02356	1.99146	0.0158
	County.19175	0.022913	-0.284317	0.33348	1.02318	0.752528	1.39582	0.4434
	County.19177	-0.0985973	-0.44365	0.237273	0.906108	0.64169	1.26779	0.2868
	County.19179	-0.198426	-0.465452	0.0747479	0.820021	0.627851	1.07761	0.0757
	County.19181	0.04179	-0.20485	0.320017	1.04268	0.81477	1.37715	0.3786
	County.19183	-0.244198	-0.540652	0.0277702	0.783333	0.582368	1.02816	0.0477
	County.19185	-0.104074	-0.468302	0.244401	0.901159	0.626065	1.27686	0.2864
	County.19187	0.0425173	-0.216771	0.312463	1.04343	0.805114	1.36679	0.3771
	County.19189	0.330007	0.0234203	0.618903	1.39098	1.0237	1.85689	0.0165
	County.19191	-0.450577	-0.78002	-0.119642	0.63726	0.458397	0.887238	0.0039
	County.19193	-0.11258	-0.367651	0.137877	0.893526	0.692359	1.14783	0.1945
	County.19195	-0.0284322	-0.36637	0.297755	0.971968	0.693246	1.34683	0.4294
	County.19197	-0.0382427	-0.350359	0.275374	0.962479	0.704435	1.31702	0.406
	County.20001	0.0899307	-0.22078	0.403754	1.0941	0.801893	1.49744	0.2882
	County.20003	-0.231331	-0.606153	0.121182	0.793477	0.545445	1.12883	0.107
	County.20005	-0.00561796	-0.318167	0.311674	0.994398	0.727482	1.36571	0.4868
	County.20007	0.0681304	-0.282477	0.40823	1.0705	0.753914	1.50415	0.352
	County.20009	-0.00756526	-0.31304	0.310371	0.992463	0.73122	1.36393	0.4778
	County.20011	-0.244174	-0.58031	0.0786406	0.783351	0.559725	1.08182	0.0768
	County.20013	-0.0165581	-0.377277	0.320414	0.983578	0.685726	1.3777	0.4636
	County.20015	0.0908095	-0.179204	0.369993	1.09506	0.835935	1.44772	0.2606
	County.20017	-0.134628	-0.51871	0.270904	0.874041	0.595288	1.31115	0.2531
	County.20019	-0.040064	-0.403165	0.311461	0.960728	0.668202	1.36542	0.4178
	County.20021	0.0162102	-0.274046	0.320978	1.01634	0.760297	1.37848	0.4549
	County.20023	-0.0355484	-0.454584	0.357208	0.965076	0.634712	1.42933	0.4305
	County.20025	0.0015681	-0.381899	0.41233	1.00157	0.682564	1.51033	0.4941
	County.20027	-0.0709129	-0.440927	0.324065	0.931543	0.64344	1.38274	0.3551
	County.20029	-0.0438451	-0.42272	0.280896	0.957102	0.655262	1.32432	0.4013
	County.20031	0.0949183	-0.271036	0.449471	1.09957	0.762589	1.56748	0.2985
	County.20033	0.0411405	-0.350649	0.447546	1.042	0.704231	1.56447	0.4213
	County.20035	0.383118	0.110115	0.662157	1.46685	1.11641	1.93897	0.004
	County.20037	0.25686	-0.0312933	0.520811	1.29286	0.969191	1.68339	0.0367
	County.20039	0.0530831	-0.349392	0.433369	1.05452	0.705117	1.54245	0.3955
	County.20041	-0.00454749	-0.353585	0.305618	0.995463	0.702166	1.35746	0.4895
	County.20043	-0.138302	-0.477262	0.209805	0.870836	0.62048	1.23344	0.211
	County.20045	-0.17393	-0.424226	0.0823364	0.840356	0.654276	1.08582	0.0868
	County.20047	0.140865	-0.245628	0.520658	1.15127	0.782213	1.68313	0.2403
	County.20049	0.0472319	-0.354343	0.410053	1.04837	0.701635	1.5069	0.4078
	County.20051	-0.232837	-0.538343	0.061915	0.792283	0.583715	1.06387	0.064
	County.20053	0.149837	-0.207339	0.52214	1.16164	0.812744	1.68563	0.2067
	County.20055	-0.120356	-0.415592	0.16139	0.886605	0.65995	1.17514	0.2067
	County.20057	-0.301507	-0.619593	0.00586393	0.739703	0.538163	1.00588	0.0273
	County.20059	-0.262484	-0.573113	0.0408303	0.769139	0.563768	1.04168	0.0465
	County.20061	-0.0160186	-0.315001	0.300294	0.984109	0.729788	1.35026	0.4671
	County.20063	-0.000100249	-0.409407	0.379492	0.9999	0.664044	1.46154	0.506
	County.20065	0.0456479	-0.347333	0.422524	1.04671	0.70657	1.52581	0.4041
	County.20067	-0.0659145	-0.443135	0.310808	0.936211	0.64202	1.36453	0.3703
	County.20069	-0.131589	-0.51103	0.254628	0.876702	0.599878	1.28998	0.2456
	County.20071	-0.0527469	-0.459744	0.353492	0.94862	0.631445	1.42403	0.4025
	County.20073	0.0252957	-0.329392	0.388173	1.02562	0.719361	1.47429	0.4448
	County.20075	-0.115778	-0.490075	0.285424	0.890673	0.61258	1.33033	0.2816
	County.20077	-0.0638374	-0.430546	0.331912	0.938158	0.650154	1.39363	0.3748
	County.20079	-0.0302066	-0.330567	0.266618	0.970245	0.718516	1.30554	0.4235
	County.20081	0.00775282	-0.376639	0.416876	1.00778	0.686163	1.51721	0.4823
	County.20083	0.0146336	-0.37236	0.427832	1.01474	0.689106	1.53393	0.4695
	County.20085	0.0207804	-0.271039	0.323149	1.021	0.762587	1.38147	0.4456
	County.20087	-0.102793	-0.402652	0.186107	0.902314	0.668545	1.20455	0.254
	County.20089	-0.0261267	-0.424816	0.377451	0.974212	0.65389	1.45856	0.45
	County.20091	0.0779288	-0.149418	0.293125	1.08105	0.861209	1.34061	0.2479
	County.20093	0.0872252	-0.285276	0.460811	1.09114	0.751807	1.58536	0.3275
	County.20095	0.00274128	-0.361115	0.365826	1.00275	0.696899	1.4417	0.4939
	County.20097	0.0983353	-0.289063	0.48359	1.10333	0.748965	1.62189	0.308
	County.20099	0.0825479	-0.221683	0.375683	1.08605	0.80117	1.45599	0.2963
	County.20101	0.0223188	-0.359385	0.438961	1.02257	0.698106	1.55109	0.464
	County.20103	0.456222	0.193344	0.720286	1.5781	1.2133	2.05502	0.0007
	County.20105	0.0156926	-0.373296	0.419102	1.01582	0.688462	1.5206	0.4686
	County.20107	0.297645	-0.0468393	0.637362	1.34668	0.954241	1.89148	0.0426
	County.20109	0.0440439	-0.366161	0.415316	1.04503	0.693391	1.51485	0.4056
	County.20111	-0.409554	-0.699921	-0.127972	0.663947	0.496625	0.879878	0.002
	County.20113	0.161047	-0.137034	0.452413	1.17474	0.87194	1.5721	0.148
	County.20115	-0.0149851	-0.384651	0.36352	0.985127	0.680688	1.43838	0.4693
	County.20117	-0.205299	-0.565019	0.157156	0.814404	0.56835	1.17018	0.1258
	County.20119	0.0133812	-0.371861	0.399533	1.01347	0.68945	1.49113	0.4692
	County.20121	0.0105585	-0.285287	0.286287	1.01061	0.751798	1.33147	0.4682
	County.20123	-0.099686	-0.479188	0.28594	0.905122	0.619286	1.33101	0.3082
	County.20125	0.127098	-0.157821	0.401541	1.13553	0.854003	1.49413	0.1865
	County.20127	-0.123276	-0.475746	0.240821	0.88402	0.621421	1.27229	0.2487
	County.20129	0.194688	-0.173364	0.58857	1.21493	0.840831	1.80141	0.1577
	County.20131	-0.0371065	-0.398573	0.31137	0.963573	0.671277	1.36529	0.4217
	County.20133	-0.044069	-0.360453	0.249645	0.956888	0.69736	1.28357	0.3928
	County.20135	-0.105607	-0.510223	0.311568	0.899779	0.600362	1.36556	0.3052
	County.20137	0.0202795	-0.348891	0.404861	1.02049	0.70547	1.49909	0.4567
	County.20139	-0.00882669	-0.30601	0.297197	0.991212	0.736379	1.34608	0.4715
	County.20141	-0.0780695	-0.461538	0.31153	0.9249	0.630314	1.36551	0.3497
	County.20143	0.0386853	-0.337807	0.396134	1.03944	0.713333	1.48607	0.4175
	County.20145	0.32815	0.015561	0.647887	1.3884	1.01568	1.9115	0.0204
	County.20147	-0.0734207	-0.444912	0.29722	0.92921	0.640881	1.34611	0.3525
	County.20149	-0.208455	-0.52088	0.0887656	0.811837	0.593998	1.09282	0.0913
	County.20151	-0.131044	-0.488531	0.215981	0.87718	0.613527	1.24108	0.2343
	County.20153	-0.119701	-0.508885	0.273398	0.887185	0.601166	1.31442	0.2772
	County.20155	0.135468	-0.133702	0.387884	1.14507	0.87485	1.47386	0.1516
	County.20157	-0.0783165	-0.462449	0.319959	0.924672	0.629739	1.37707	0.3539
	County.20159	0.372361	0.0197158	0.702351	1.45116	1.01991	2.01849	0.0182
	County.20161	-0.296537	-0.56687	-0.0161948	0.743388	0.567298	0.983936	0.0178
	County.20163	-0.120151	-0.475943	0.250168	0.886787	0.621299	1.28424	0.2546
	County.20165	-0.0813029	-0.471504	0.296757	0.921914	0.624063	1.34549	0.3404
	County.20167	-0.15713	-0.538781	0.23921	0.854593	0.583459	1.27024	0.2141
	County.20169	0.0285616	-0.229493	0.29452	1.02897	0.794937	1.34248	0.4178
	County.20171	0.0703677	-0.32514	0.45552	1.0729	0.722426	1.57699	0.3687
	County.20173	0.00926797	-0.237204	0.263387	1.00931	0.78883	1.30133	0.471
	County.20175	0.177911	-0.151063	0.497239	1.19472	0.859794	1.64417	0.1419
	County.20177	0.172746	-0.0508615	0.430049	1.18856	0.95041	1.53733	0.0767
	County.20179	0.0608754	-0.358693	0.457286	1.06277	0.698588	1.57978	0.3828
	County.20181	0.114019	-0.259447	0.449695	1.12077	0.771478	1.56783	0.2615
	County.20183	0.0122895	-0.397303	0.418	1.01237	0.67213	1.51892	0.4778
	County.20185	0.133416	-0.278453	0.512419	1.14273	0.756954	1.66932	0.2496
	County.20187	-0.0416624	-0.456291	0.360364	0.959194	0.633629	1.43385	0.4252
	County.20189	-0.091301	-0.469434	0.272531	0.912743	0.625356	1.31328	0.3122
	County.20191	-0.102047	-0.413771	0.203035	0.902987	0.661153	1.22511	0.2555
	County.20193	0.0652914	-0.28669	0.397452	1.06747	0.750744	1.48803	0.3539
	County.20195	-0.0141841	-0.415573	0.388778	0.985916	0.659962	1.47518	0.474
	County.20197	0.0371129	-0.294134	0.380729	1.03781	0.745177	1.46335	0.4123
	County.20199	-0.0670555	-0.472497	0.351578	0.935143	0.623443	1.42131	0.3804
	County.20201	-0.0864319	-0.483479	0.289298	0.917198	0.616634	1.33549	0.3346
	County.20203	-0.059746	-0.490847	0.334345	0.942004	0.612107	1.39703	0.3877
	County.20205	0.0954649	-0.241596	0.419268	1.10017	0.785374	1.52085	0.286
	County.20207	0.0146827	-0.361185	0.384632	1.01479	0.69685	1.46907	0.468
	County.20209	0.430401	0.191685	0.657634	1.53787	1.21129	1.93022	0.0002
	County.21001	-0.260542	-0.577809	0.0696481	0.770634	0.561126	1.07213	0.0579
	County.21003	0.110712	-0.20048	0.395977	1.11707	0.818338	1.48584	0.2342
	County.21005	0.0191568	-0.266828	0.292034	1.01934	0.765805	1.33915	0.4448
	County.21007	0.152924	-0.191436	0.489765	1.16524	0.825772	1.63193	0.1903
	County.21009	-0.021846	-0.293551	0.245203	0.978391	0.745611	1.27788	0.4406
	County.21011	0.0241067	-0.290388	0.333932	1.0244	0.747974	1.39645	0.4408
	County.21013	-0.212667	-0.514065	0.0794591	0.808425	0.598059	1.0827	0.0826
	County.21015	0.0555773	-0.173741	0.272037	1.05715	0.840515	1.31264	0.3127
	County.21017	0.0677956	-0.21794	0.346935	1.07015	0.804174	1.41473	0.3229
	County.21019	0.18298	-0.0611297	0.442084	1.20079	0.940701	1.55595	0.0746
	County.21021	-0.0960391	-0.368996	0.167218	0.908429	0.691428	1.18201	0.2408
	County.21023	-0.00642036	-0.319514	0.305957	0.9936	0.726502	1.35792	0.4825
	County.21025	0.0227764	-0.294697	0.369236	1.02304	0.744757	1.44663	0.4459
	County.21027	-0.0923639	-0.389729	0.218428	0.911773	0.67724	1.24412	0.2771
	County.21029	0.0303538	-0.223973	0.279221	1.03082	0.799337	1.3221	0.4052
	County.21031	-0.0295682	-0.349382	0.293387	0.970865	0.705124	1.34096	0.4289
	County.21033	0.217172	-0.0829559	0.522439	1.24256	0.920392	1.68613	0.0814
	County.21035	0.0230983	-0.248782	0.304002	1.02337	0.77975	1.35527	0.4324
	County.21037	-0.286483	-0.515737	-0.059603	0.7509	0.59706	0.942139	0.007
	County.21039	-0.0101797	-0.365815	0.345625	0.989872	0.693631	1.41287	0.4828
	County.21041	-0.0234656	-0.322805	0.29193	0.976808	0.724115	1.33901	0.4409
	County.21043	0.091901	-0.196468	0.360762	1.09626	0.821628	1.43442	0.2527
	County.21045	-0.0506743	-0.389626	0.290644	0.950588	0.67731	1.33729	0.3841
	County.21047	-0.268927	-0.542333	-0.00711514	0.764199	0.581391	0.99291	0.0236
	County.21049	-0.0617046	-0.331612	0.198312	0.940161	0.717766	1.21934	0.3307
	County.21051	-0.255855	-0.577311	0.068906	0.774254	0.561406	1.07134	0.0563
	County.21053	-0.236922	-0.609375	0.138077	0.789053	0.54369	1.14806	0.1104
	County.21055	0.104858	-0.249912	0.421507	1.11055	0.778869	1.52426	0.2727
	County.21057	-0.0010234	-0.382211	0.352009	0.998977	0.682351	1.42192	0.5042
	County.21059	0.0380339	-0.203267	0.293192	1.03877	0.81606	1.3407	0.3832
	County.21061	-0.0124328	-0.354164	0.314513	0.987644	0.70176	1.36959	0.4717
	County.21063	0.160644	-0.188661	0.509511	1.17427	0.828067	1.66448	0.182
	County.21065	-0.0519118	-0.376082	0.249695	0.949413	0.686546	1.28363	0.3794
	County.21067	-0.0641498	-0.293498	0.156849	0.937864	0.74565	1.16982	0.2879
	County.21069	0.164305	-0.132447	0.477892	1.17857	0.875949	1.61267	0.149
	County.21071	-0.0934892	-0.359968	0.182116	0.910748	0.697698	1.19975	0.2546
	County.21073	0.160112	-0.0961399	0.415331	1.17364	0.908337	1.51487	0.1068
	County.21075	0.050082	-0.272064	0.361126	1.05136	0.761805	1.43494	0.3775
	County.21077	-0.0416192	-0.355184	0.279934	0.959235	0.701045	1.32304	0.3949
	County.21079	0.317913	0.0239402	0.584175	1.37426	1.02423	1.79351	0.0133
	County.21081	0.0607094	-0.22187	0.310635	1.06259	0.801019	1.36429	0.3235
	County.21083	-0.161593	-0.42875	0.110904	0.850787	0.651323	1.11729	0.1192
	County.21085	0.0704982	-0.197825	0.361823	1.07304	0.820513	1.43595	0.3094
	County.21087	-0.0510908	-0.394613	0.283097	0.950192	0.673941	1.32723	0.3786
	County.21089	0.148691	-0.109852	0.407508	1.16031	0.895967	1.50307	0.1306
	County.21091	0.0524116	-0.259575	0.335785	1.05381	0.771379	1.39904	0.3584
	County.21093	-0.00161357	-0.271726	0.263005	0.998388	0.762063	1.30083	0.5008
	County.21095	-0.330959	-0.626225	-0.0324503	0.718235	0.534606	0.968071	0.0148
	County.21097	0.489094	0.232523	0.7582	1.63084	1.26178	2.13443	0.0003
	County.21099	-0.0209112	-0.328748	0.28451	0.979306	0.719824	1.32911	0.4494
	County.21101	-0.239485	-0.490714	0.00181221	0.787033	0.612189	1.00181	0.0276
	County.21103	0.217223	-0.0724424	0.506535	1.24262	0.930119	1.65953	0.0727
	County.21105	-0.132163	-0.505672	0.234543	0.876198	0.6031	1.26433	0.2426
	County.21107	0.309356	0.0630242	0.558013	1.36255	1.06505	1.7472	0.0081
	County.21109	0.178345	-0.118023	0.491269	1.19524	0.888675	1.63439	0.123
	County.21111	-0.129618	-0.344586	0.0847512	0.878431	0.708514	1.08845	0.1186
	County.21113	0.125202	-0.133391	0.377015	1.13338	0.875123	1.45793	0.1743
	County.21115	0.234043	-0.0451185	0.510473	1.2637	0.955884	1.66608	0.0513
	County.21117	-0.0474443	-0.270742	0.176791	0.953664	0.762813	1.19338	0.337
	County.21119	-0.0752603	-0.401447	0.2619	0.927502	0.669351	1.2994	0.332
	County.21121	-0.288057	-0.598066	0.0221959	0.749719	0.549874	1.02244	0.0359
	County.21123	-0.167156	-0.46907	0.157586	0.846068	0.625584	1.17068	0.1453
	County.21125	-0.204273	-0.482306	0.0385498	0.81524	0.617358	1.0393	0.0612
	County.21127	0.224858	-0.0669935	0.517384	1.25214	0.935201	1.67763	0.0649
	County.21129	0.0888543	-0.266453	0.440611	1.09292	0.766092	1.55366	0.3155
	County.21131	-0.170762	-0.488348	0.164556	0.843022	0.613639	1.17887	0.1532
	County.21133	0.157472	-0.126086	0.44004	1.17055	0.881539	1.55277	0.1326
	County.21135	-0.0277488	-0.349679	0.285057	0.972633	0.704914	1.32984	0.4263
	County.21137	-0.0939279	-0.360942	0.185662	0.910348	0.69702	1.20402	0.25
	County.21139	-0.118362	-0.425587	0.201684	0.888374	0.653386	1.22346	0.2342
	County.21141	-0.00698918	-0.281418	0.269323	0.993035	0.754713	1.30908	0.4893
	County.21143	-0.0313942	-0.361887	0.324432	0.969094	0.696361	1.38325	0.4323
	County.21145	-0.018639	-0.273469	0.243938	0.981534	0.760736	1.27627	0.4374
	County.21147	-0.0223549	-0.362742	0.300506	0.977893	0.695766	1.35054	0.4472
	County.21149	-0.0415801	-0.358592	0.273086	0.959272	0.698659	1.31401	0.3978
	County.21151	-0.0866082	-0.331102	0.148051	0.917036	0.718132	1.15957	0.2427
	County.21153	-0.146472	-0.475055	0.198345	0.86375	0.621851	1.21938	0.1955
	County.21155	0.0360685	-0.266503	0.317994	1.03673	0.766053	1.37437	0.4061
	County.21157	-0.168518	-0.453701	0.127677	0.844916	0.635273	1.13619	0.1289
	County.21159	-0.177631	-0.503796	0.153715	0.837251	0.604232	1.16616	0.1448
	County.21161	-0.025732	-0.336214	0.275451	0.974596	0.71447	1.31713	0.4408
	County.21163	0.0349469	-0.267601	0.314536	1.03556	0.765213	1.36962	0.4026
	County.21165	0.0684696	-0.304124	0.414496	1.07087	0.73777	1.51361	0.3508
	County.21167	-0.0890809	-0.365311	0.195073	0.914772	0.693981	1.2154	0.2678
	County.21169	-0.040898	-0.361641	0.281732	0.959927	0.696533	1.32542	0.4052
	County.21171	0.00421152	-0.316657	0.353143	1.00422	0.728581	1.42353	0.4862
	County.21173	0.0371071	-0.229765	0.322131	1.0378	0.794721	1.38007	0.3985
	County.21175	-0.201928	-0.52472	0.151698	0.817154	0.591721	1.16381	0.1224
	County.21177	0.253488	-0.0330328	0.52025	1.28851	0.967507	1.68245	0.0393
	County.21179	-0.0363924	-0.295742	0.234158	0.964262	0.74398	1.26384	0.3917
	County.21181	0.322959	0.0108864	0.625714	1.38121	1.01095	1.86958	0.0198
	County.21183	0.0161942	-0.272581	0.28879	1.01633	0.761412	1.33481	0.4531
	County.21185	-0.0779501	-0.329158	0.184414	0.925011	0.719529	1.20251	0.2751
	County.21187	0.090507	-0.241846	0.418533	1.09473	0.785177	1.51973	0.297
	County.21189	-0.129472	-0.503796	0.290594	0.878559	0.604232	1.33722	0.2586
	County.21191	-0.0262663	-0.331377	0.258704	0.974076	0.717934	1.29525	0.4335
	County.21193	-0.222652	-0.525426	0.0697514	0.800393	0.591303	1.07224	0.0709
	County.21195	-0.163985	-0.420506	0.0894876	0.848755	0.656715	1.09361	0.1069
	County.21197	0.156836	-0.138717	0.472512	1.1698	0.870474	1.60402	0.1591
	County.21199	0.00669905	-0.257852	0.262832	1.00672	0.77271	1.30061	0.4769
	County.21201	0.142094	-0.2546	0.519626	1.15269	0.775226	1.6814	0.2327
	County.21203	0.0705801	-0.232514	0.389518	1.07313	0.792539	1.47627	0.3295
	County.21205	0.2623	-0.0157783	0.549627	1.29992	0.984346	1.73261	0.0357
	County.21207	0.0810264	-0.249472	0.387707	1.0844	0.779212	1.4736	0.3074
	County.21209	0.370801	0.142049	0.621071	1.4489	1.15263	1.86092	0.0012
	County.21211	0.425935	0.165272	0.680454	1.53102	1.17971	1.97477	0.0002
	County.21213	-0.0827444	-0.368098	0.223108	0.920586	0.692049	1.24996	0.2899
	County.21215	0.0131805	-0.273711	0.30881	1.01327	0.760552	1.3618	0.4626
	County.21217	-0.13095	-0.420824	0.151723	0.877262	0.656506	1.16384	0.189
	County.21219	-0.0661261	-0.388932	0.26411	0.936013	0.67778	1.30227	0.3499
	County.21221	0.120352	-0.182765	0.423283	1.12789	0.832964	1.52697	0.2242
	County.21223	-0.0175119	-0.340815	0.299422	0.98264	0.71119	1.34908	0.4546
	County.21225	-0.053868	-0.340919	0.223101	0.947557	0.711116	1.24995	0.3568
	County.21227	0.103745	-0.143997	0.335384	1.10932	0.86589	1.39848	0.1942
	County.21229	0.0306829	-0.263457	0.326851	1.03116	0.768391	1.3866	0.4191
	County.21231	-0.194962	-0.511369	0.128269	0.822866	0.599674	1.13686	0.1134
	County.21233	0.00428809	-0.282311	0.280068	1.0043	0.754039	1.32322	0.4873
	County.21235	-0.293371	-0.574597	0.00548602	0.745746	0.562932	1.0055	0.0239
	County.21237	0.196122	-0.152563	0.532436	1.21668	0.858505	1.70308	0.1359
	County.21239	-0.0658723	-0.323075	0.195287	0.93625	0.72392	1.21566	0.3144
	County.22001	0.0946282	-0.161891	0.373903	1.09925	0.850534	1.4534	0.2467
	County.22003	-0.0597793	-0.372921	0.271162	0.941972	0.68872	1.31149	0.3565
	County.22005	-0.180699	-0.451729	0.0845801	0.834687	0.636526	1.08826	0.0933
	County.22007	0.0316325	-0.279558	0.357649	1.03214	0.756118	1.42996	0.4238
	County.22009	-0.219747	-0.539029	0.0795478	0.802722	0.583314	1.0828	0.0846
	County.22011	-0.154338	-0.45007	0.131504	0.856983	0.637584	1.14054	0.1495
	County.22013	0.245099	-0.105384	0.576541	1.27775	0.899979	1.77987	0.0831
	County.22015	0.410148	0.16873	0.673503	1.50704	1.1838	1.9611	0.0012
	County.22017	0.418366	0.186525	0.66313	1.51948	1.20505	1.94086	0.0002
	County.22019	0.0378635	-0.21334	0.29003	1.03859	0.807882	1.33647	0.3813
	County.22021	-0.0549854	-0.405283	0.298812	0.946499	0.666788	1.34826	0.3823
	County.22023	-0.077698	-0.44392	0.28691	0.925244	0.641517	1.3323	0.3353
	County.22025	0.00358312	-0.330006	0.356637	1.00359	0.718919	1.42852	0.4881
	County.22027	0.218601	-0.11975	0.552786	1.24433	0.887142	1.73809	0.101
	County.22029	0.0138595	-0.341384	0.340769	1.01396	0.710786	1.40603	0.4649
	County.22031	-0.0569425	-0.35828	0.224679	0.944648	0.698877	1.25192	0.3583
	County.22033	-0.0505815	-0.286167	0.188579	0.950676	0.751137	1.20753	0.3354
	County.22035	-0.0766397	-0.477821	0.320539	0.926224	0.620133	1.37787	0.3527
	County.22037	-0.162896	-0.510691	0.173374	0.84968	0.600081	1.18931	0.1781
	County.22039	0.21903	-0.0642769	0.516727	1.24487	0.937745	1.67653	0.0708
	County.22041	-0.16778	-0.507786	0.177609	0.84554	0.601827	1.19436	0.1689
	County.22043	0.0949497	-0.227937	0.403909	1.0996	0.796175	1.49767	0.2796
	County.22045	0.0791742	-0.187692	0.345374	1.08239	0.82887	1.41252	0.2788
	County.22047	0.118803	-0.188505	0.43406	1.12615	0.828197	1.54351	0.2339
	County.22049	-0.227418	-0.575243	0.137224	0.796588	0.562568	1.14709	0.0976
	County.22051	-0.101987	-0.347179	0.148354	0.903041	0.706679	1.15992	0.2087
	County.22053	0.0941534	-0.184057	0.374314	1.09873	0.831888	1.45399	0.2577
	County.22055	-0.0990066	-0.348413	0.151535	0.905737	0.705807	1.16362	0.2136
	County.22057	-0.153428	-0.427769	0.111609	0.857763	0.651962	1.11808	0.1318
	County.22059	0.0354408	-0.273534	0.353584	1.03608	0.760687	1.42416	0.4089
	County.22061	-0.116364	-0.412635	0.204289	0.890151	0.661904	1.22665	0.2339
	County.22063	-0.0544208	-0.321012	0.205151	0.947034	0.725414	1.22771	0.3398
	County.22065	-0.0100523	-0.385509	0.393399	0.989998	0.680105	1.48201	0.4797
	County.22067	0.132538	-0.182148	0.447837	1.14172	0.833478	1.56492	0.2031
	County.22069	-0.157704	-0.461305	0.159635	0.854103	0.63046	1.17308	0.1573
	County.22071	0.0131259	-0.237181	0.258981	1.01321	0.788848	1.29561	0.4593
	County.22073	0.224173	-0.0267384	0.476737	1.25129	0.973616	1.61081	0.0408
	County.22075	-0.087443	-0.420561	0.227625	0.916271	0.656678	1.25561	0.2977
	County.22077	-0.0661369	-0.383192	0.268913	0.936003	0.681682	1.30854	0.3459
	County.22079	0.138638	-0.101041	0.394534	1.14871	0.903896	1.48369	0.1384
	County.22081	-0.0204531	-0.397643	0.342176	0.979755	0.671902	1.40801	0.4643
	County.22083	-0.121058	-0.445834	0.227065	0.885983	0.64029	1.25491	0.2425
	County.22085	-0.0564358	-0.380321	0.238601	0.945127	0.683642	1.26947	0.3639
	County.22087	-0.221024	-0.525789	0.0722324	0.801697	0.591089	1.07491	0.0747
	County.22089	0.181563	-0.109139	0.460368	1.19909	0.896606	1.58466	0.1039
	County.22091	0.0437015	-0.335115	0.445222	1.04467	0.715256	1.56084	0.4066
	County.22093	0.00210867	-0.3077	0.319977	1.00211	0.735136	1.3771	0.4945
	County.22095	0.126938	-0.149607	0.419564	1.13535	0.861046	1.5213	0.1976
	County.22097	-0.0547908	-0.326045	0.210987	0.946683	0.721773	1.2349	0.3448
	County.22099	-0.137927	-0.423539	0.143269	0.871162	0.654725	1.15404	0.1723
	County.22101	-0.0640984	-0.354055	0.208495	0.937913	0.701836	1.23182	0.3283
	County.22103	-0.0899323	-0.351929	0.150606	0.913993	0.70333	1.16254	0.2384
	County.22105	-0.158185	-0.421589	0.106833	0.853692	0.656004	1.11275	0.1222
	County.22107	-0.0521304	-0.480281	0.350111	0.949205	0.61861	1.41923	0.3983
	County.22109	0.403604	0.153682	0.655194	1.49721	1.16612	1.92552	0.0015
	County.22111	-0.105402	-0.392637	0.210016	0.899963	0.675274	1.2337	0.2519
	County.22113	-0.00995113	-0.281423	0.264608	0.990098	0.754709	1.30292	0.4723
	County.22115	-0.0894616	-0.391736	0.207033	0.914423	0.675882	1.23002	0.2798
	County.22117	0.0360054	-0.250835	0.332295	1.03666	0.778151	1.39416	0.4038
	County.22119	0.200273	-0.0836053	0.472001	1.22174	0.919794	1.6032	0.0807
	County.22121	-0.271795	-0.583708	0.0433049	0.762011	0.557826	1.04426	0.0425
	County.22123	-0.0198907	-0.357275	0.351067	0.980306	0.69958	1.42058	0.4609
	County.22125	-0.143224	-0.51856	0.233101	0.86656	0.595377	1.26251	0.232
	County.22127	-0.0213377	-0.368257	0.313194	0.978888	0.691939	1.36779	0.4587
	County.23001	0.0777911	-0.186604	0.329899	1.0809	0.829772	1.39083	0.2746
	County.23003	-0.0898145	-0.37248	0.189661	0.914101	0.689023	1.20884	0.265
	County.23005	-0.441524	-0.699464	-0.194978	0.643056	0.496851	0.822853	0.0001
	County.23007	-0.00421381	-0.287549	0.277344	0.995795	0.7501	1.31962	0.4871
	County.23009	0.175196	-0.111238	0.449798	1.19148	0.894726	1.568	0.1143
	County.23011	-0.0510392	-0.294987	0.213875	0.950241	0.744542	1.23847	0.3505
	County.23013	0.266683	-0.00531788	0.532087	1.30563	0.994696	1.70248	0.0272
	County.23015	0.187754	-0.0967862	0.464072	1.20654	0.90775	1.59054	0.0932
	County.23017	0.0126376	-0.261813	0.283421	1.01272	0.769655	1.32766	0.4624
	County.23019	0.118505	-0.151925	0.365037	1.12581	0.859052	1.44057	0.1842
	County.23021	-0.17226	-0.494048	0.165682	0.841761	0.610152	1.1802	0.1555
	County.23023	0.0302719	-0.240357	0.302657	1.03073	0.786347	1.35345	0.4072
	County.23025	-0.00800121	-0.294089	0.268833	0.992031	0.74521	1.30844	0.4767
	County.23027	0.131159	-0.124752	0.402273	1.14015	0.882716	1.49522	0.1676
	County.23029	0.16778	-0.134854	0.474554	1.18268	0.873843	1.6073	0.1385
	County.23031	-0.180029	-0.428485	0.0749908	0.835246	0.651496	1.07787	0.0821
	County.24001	-0.0862659	-0.338771	0.158514	0.91735	0.712645	1.17177	0.2488
	County.24003	0.2515	0.0339748	0.459189	1.28595	1.03456	1.58279	0.0102
	County.24005	-0.0282309	-0.235267	0.182636	0.972164	0.79036	1.20038	0.3996
	County.24009	-0.205622	-0.440578	0.0357119	0.814141	0.643664	1.03636	0.0463
	County.24011	0.00413769	-0.276224	0.27572	1.00415	0.758643	1.31748	0.4907
	County.24013	0.234179	0.011184	0.479066	1.26387	1.01125	1.61457	0.0259
	County.24015	0.0693868	-0.180369	0.313815	1.07185	0.834962	1.36864	0.2925
	County.24017	-0.131631	-0.360459	0.117571	0.876664	0.697356	1.12476	0.1396
	County.24019	0.0132628	-0.264844	0.290471	1.01335	0.767326	1.33706	0.4674
	County.24021	0.0573657	-0.166542	0.282782	1.05904	0.846588	1.32682	0.3033
	County.24023	-0.575493	-0.872734	-0.296785	0.562427	0.417808	0.743203	0.0001
	County.24025	0.0020884	-0.223512	0.22594	1.00209	0.799705	1.2535	0.4906
	County.24027	-0.0252697	-0.236064	0.200476	0.975047	0.78973	1.22198	0.4106
	County.24029	0.0970968	-0.184023	0.364914	1.10197	0.831917	1.44039	0.2471
	County.24031	0.297026	0.086103	0.510003	1.34585	1.08992	1.6653	0.003
	County.24033	-0.156756	-0.375843	0.0549324	0.854912	0.68671	1.05647	0.0808
	County.24035	0.10517	-0.157026	0.351101	1.1109	0.854682	1.42063	0.2099
	County.24037	-0.0657106	-0.324677	0.179212	0.936402	0.722761	1.19627	0.3058
	County.24039	0.0767271	-0.213738	0.384197	1.07975	0.80756	1.46843	0.3072
	County.24041	-0.00265863	-0.258862	0.252618	0.997345	0.771929	1.28739	0.4963
	County.24043	0.101033	-0.129131	0.344633	1.10631	0.878859	1.41147	0.2054
	County.24045	0.0759835	-0.183658	0.316152	1.07894	0.83222	1.37184	0.2745
	County.24047	-0.100377	-0.37784	0.168469	0.904496	0.68534	1.18349	0.2401
	County.25001	0.064284	-0.200138	0.336234	1.0664	0.818617	1.39967	0.3219
	County.25003	-0.130846	-0.409704	0.125869	0.877353	0.663847	1.13413	0.1679
	County.25005	-0.0127406	-0.241496	0.218607	0.98734	0.785452	1.24434	0.4572
	County.25007	0.0515005	-0.304692	0.394268	1.05285	0.73735	1.4833	0.3845
	County.25009	0.109561	-0.104235	0.34332	1.11579	0.901013	1.40962	0.1709
	County.25011	-0.231371	-0.504816	0.0392752	0.793445	0.603617	1.04006	0.0472
	County.25013	0.0116295	-0.235285	0.249127	1.0117	0.790345	1.2829	0.4605
	County.25015	-0.0266904	-0.286555	0.232192	0.973663	0.750846	1.26136	0.4202
	County.25017	-0.0901366	-0.319165	0.128793	0.913806	0.726756	1.13745	0.2181
	County.25019	-0.0716159	-0.453824	0.288707	0.930888	0.635195	1.3347	0.3534
	County.25021	-0.00650246	-0.235749	0.215047	0.993519	0.789979	1.23992	0.4823
	County.25023	0.056833	-0.189594	0.279432	1.05848	0.827295	1.32238	0.3197
	County.25025	0.101548	-0.126986	0.322369	1.10688	0.880746	1.38039	0.1911
	County.25027	0.225576	-0.0103577	0.479154	1.25304	0.989696	1.61471	0.0356
	County.26001	-0.129518	-0.467345	0.205167	0.878519	0.626664	1.22773	0.2272
	County.26003	0.147634	-0.188813	0.473589	1.15909	0.827942	1.60575	0.1867
	County.26005	0.215439	-0.0270311	0.473073	1.24041	0.973331	1.60492	0.0473
	County.26007	-0.082076	-0.365339	0.197557	0.921202	0.693962	1.21842	0.2871
	County.26009	0.00394282	-0.300428	0.302333	1.00395	0.740501	1.35301	0.4833
	County.26011	0.0636752	-0.248081	0.357728	1.06575	0.780297	1.43008	0.3374
	County.26013	-0.0961983	-0.439982	0.266598	0.908284	0.644048	1.30552	0.2983
	County.26015	0.275462	0.00204878	0.535379	1.31714	1.00205	1.7081	0.0236
	County.26017	0.0923317	-0.150898	0.330784	1.09673	0.859935	1.39206	0.2273
	County.26019	-0.064835	-0.381502	0.249912	0.937222	0.682835	1.28391	0.348
	County.26021	-0.017624	-0.255164	0.213825	0.98253	0.77479	1.23841	0.4408
	County.26023	-0.00254355	-0.272005	0.260517	0.99746	0.761851	1.2976	0.4966
	County.26025	0.120795	-0.104329	0.3592	1.12839	0.900929	1.43218	0.1583
	County.26027	-0.22583	-0.505842	0.0425862	0.797854	0.602998	1.04351	0.0525
	County.26029	-0.137984	-0.43632	0.14847	0.871113	0.646411	1.16006	0.18
	County.26031	-0.165432	-0.462107	0.145634	0.847528	0.629955	1.15677	0.149
	County.26033	0.257016	-0.0231807	0.553276	1.29307	0.977086	1.73894	0.0428
	County.26035	0.145077	-0.124052	0.426565	1.15613	0.883334	1.53199	0.1521
	County.26037	-0.0915102	-0.352384	0.161347	0.912552	0.70301	1.17509	0.2457
	County.26039	-0.209269	-0.533444	0.118098	0.811177	0.586581	1.12535	0.1078
	County.26041	-0.205844	-0.487576	0.071066	0.81396	0.614113	1.07365	0.0761
	County.26043	0.29692	0.0176958	0.605999	1.34571	1.01785	1.83308	0.0234
	County.26045	0.0322172	-0.217259	0.26608	1.03274	0.804721	1.30484	0.3929
	County.26047	0.00161993	-0.277547	0.287558	1.00162	0.75764	1.33317	0.4998
	County.26049	0.572561	0.350199	0.792289	1.7728	1.41935	2.20845	1e-05
	County.26051	0.0272001	-0.265154	0.330427	1.02757	0.767088	1.39156	0.4287
	County.26053	-0.114809	-0.424446	0.205219	0.891536	0.654132	1.22779	0.2388
	County.26055	-0.188298	-0.446831	0.0849945	0.828367	0.639652	1.08871	0.0827
	County.26057	0.0592878	-0.198681	0.320905	1.06108	0.819812	1.37838	0.3216
	County.26059	-0.134559	-0.386957	0.126407	0.874101	0.67912	1.13474	0.1504
	County.26061	0.0198209	-0.281298	0.312686	1.02002	0.754803	1.36709	0.4484
	County.26063	0.113111	-0.16577	0.397364	1.11976	0.847241	1.4879	0.2117
	County.26065	-0.169782	-0.394557	0.0610413	0.843849	0.673978	1.06294	0.0729
	County.26067	0.190032	-0.0557289	0.455517	1.20929	0.945795	1.57699	0.0771
	County.26069	0.157664	-0.140431	0.437741	1.17077	0.868983	1.5492	0.1437
	County.26071	-0.0588761	-0.371335	0.275282	0.942824	0.689813	1.3169	0.368
	County.26073	0.0111103	-0.253441	0.262728	1.01117	0.776125	1.30047	0.465
	County.26075	0.0392291	-0.194468	0.273255	1.04001	0.823273	1.31424	0.3679
	County.26077	0.132851	-0.105759	0.359322	1.14208	0.899641	1.43236	0.1341
	County.26079	-0.0217491	-0.331065	0.278977	0.978486	0.718158	1.32178	0.4464
	County.26081	-0.0465031	-0.264539	0.172505	0.954562	0.76756	1.18828	0.3347
	County.26083	-0.00995701	-0.385627	0.403683	0.990092	0.680024	1.49733	0.4726
	County.26085	-0.0692952	-0.404122	0.256075	0.933051	0.667563	1.29185	0.3401
	County.26087	0.290366	0.0560022	0.536701	1.33692	1.0576	1.71035	0.0099
	County.26089	-0.097384	-0.4117	0.244888	0.907208	0.662523	1.27748	0.2814
	County.26091	-0.0833092	-0.323548	0.164013	0.920067	0.723577	1.17823	0.2523
	County.26093	-0.273335	-0.517802	-0.0193	0.760838	0.595829	0.980885	0.0151
	County.26095	-0.103575	-0.470776	0.264206	0.901608	0.624517	1.3024	0.2917
	County.26097	-0.0380401	-0.373438	0.297643	0.962674	0.688364	1.34668	0.4132
	County.26099	-0.0240638	-0.25071	0.19983	0.976223	0.778248	1.2212	0.4175
	County.26101	-0.214265	-0.510672	0.0797101	0.807134	0.600092	1.08297	0.0794
	County.26103	-0.169474	-0.43434	0.107282	0.844109	0.647692	1.11325	0.1114
	County.26105	0.0860832	-0.186186	0.354608	1.0899	0.830119	1.42562	0.2774
	County.26107	-0.112825	-0.390065	0.152268	0.893307	0.677013	1.16447	0.2091
	County.26109	-0.0460014	-0.350412	0.243668	0.955041	0.704398	1.27592	0.3772
	County.26111	-0.319108	-0.578617	-0.05856	0.726797	0.560673	0.943122	0.0076
	County.26113	-0.198345	-0.510402	0.123029	0.820087	0.600254	1.13092	0.1104
	County.26115	0.33279	0.0848487	0.584813	1.39485	1.08855	1.79466	0.0039
	County.26117	0.095493	-0.178113	0.366296	1.1002	0.836848	1.44238	0.2385
	County.26119	0.119967	-0.199382	0.442079	1.12746	0.819237	1.55594	0.2262
	County.26121	0.0281829	-0.217843	0.27677	1.02858	0.804251	1.31886	0.407
	County.26123	0.024381	-0.237161	0.28313	1.02468	0.788864	1.32728	0.4259
	County.26125	0.0122092	-0.204297	0.232378	1.01228	0.81522	1.2616	0.4534
	County.26127	0.0809018	-0.231203	0.359085	1.08426	0.793578	1.43202	0.2909
	County.26129	0.283068	0.00488248	0.5797	1.3272	1.00489	1.7855	0.028
	County.26131	-0.109567	-0.467505	0.245738	0.896222	0.626564	1.27856	0.2695
	County.26133	-0.0796035	-0.36457	0.194479	0.923482	0.694495	1.21468	0.2918
	County.26135	0.0916125	-0.239282	0.452956	1.09594	0.787193	1.57296	0.3055
	County.26137	-0.170402	-0.467127	0.11701	0.843326	0.626801	1.12413	0.1295
	County.26139	-0.108925	-0.35063	0.130371	0.896798	0.704244	1.13925	0.1883
	County.26141	0.0720073	-0.23378	0.40862	1.07466	0.791536	1.50474	0.338
	County.26143	0.0733259	-0.205648	0.380312	1.07608	0.81412	1.46274	0.3137
	County.26145	0.0948074	-0.148629	0.341027	1.09945	0.861889	1.40639	0.2261
	County.26147	0.101249	-0.144738	0.364078	1.10655	0.865249	1.43919	0.2184
	County.26149	-0.275367	-0.532108	-0.0304663	0.759293	0.587365	0.969993	0.0156
	County.26151	0.0175786	-0.262959	0.287811	1.01773	0.768774	1.33351	0.4486
	County.26153	-0.22842	-0.556946	0.139029	0.79579	0.572956	1.14916	0.0983
	County.26155	0.0971226	-0.139469	0.342877	1.102	0.86982	1.40899	0.2183
	County.26157	0.173846	-0.110443	0.447741	1.18987	0.895437	1.56477	0.1105
	County.26159	0.0516678	-0.212553	0.307376	1.05303	0.808517	1.35985	0.3503
	County.26161	-0.0575012	-0.289413	0.166673	0.944121	0.748703	1.18137	0.3122
	County.26163	0.22851	-0.0101488	0.445402	1.25673	0.989903	1.56112	0.0248
	County.26165	-0.179937	-0.455538	0.0880771	0.835323	0.634107	1.09207	0.1012
	County.27001	-0.0190337	-0.399886	0.362182	0.981146	0.670396	1.43646	0.4556
	County.27003	0.0378499	-0.213384	0.266234	1.03858	0.807846	1.30504	0.3801
	County.27005	0.0231615	-0.341883	0.348419	1.02343	0.710431	1.41683	0.4455
	County.27007	0.102855	-0.223185	0.438986	1.10833	0.799967	1.55113	0.2682
	County.27009	-0.108056	-0.429393	0.209024	0.897577	0.650904	1.23248	0.2518
	County.27011	-0.0915346	-0.48239	0.314922	0.91253	0.617306	1.37015	0.3331
	County.27013	0.358987	0.0730381	0.648859	1.43188	1.07577	1.91336	0.0078
	County.27015	-0.230751	-0.594345	0.110188	0.793937	0.551924	1.11649	0.1008
	County.27017	-0.143668	-0.493463	0.19092	0.866175	0.610509	1.21036	0.2062
	County.27019	-0.117815	-0.410633	0.164634	0.888861	0.66323	1.17896	0.2157
	County.27021	-0.0423855	-0.41782	0.334034	0.9585	0.658481	1.39659	0.4126
	County.27023	-0.0995716	-0.473188	0.291175	0.905225	0.623013	1.338	0.3054
	County.27025	0.2347	-0.0550513	0.534312	1.26453	0.946437	1.70627	0.0601
	County.27027	-0.114849	-0.436168	0.187649	0.891501	0.646509	1.20641	0.2403
	County.27029	-0.00373657	-0.397324	0.381806	0.99627	0.672116	1.46493	0.498
	County.27031	-0.0443897	-0.437124	0.363116	0.956581	0.645891	1.4378	0.4203
	County.27033	-0.0239777	-0.401471	0.368633	0.976307	0.669335	1.44576	0.4511
	County.27035	-0.0464919	-0.363623	0.279088	0.954572	0.695153	1.32192	0.3956
	County.27037	-0.0270522	-0.275015	0.2053	0.97331	0.759561	1.22789	0.4088
	County.27039	-0.145855	-0.46606	0.188965	0.864283	0.62747	1.208	0.1935
	County.27041	0.00108078	-0.346608	0.335669	1.00108	0.707083	1.39888	0.4951
	County.27043	0.00364409	-0.331897	0.351605	1.00365	0.717561	1.42135	0.4943
	County.27045	-0.252842	-0.570413	0.0921737	0.776591	0.565292	1.09656	0.0691
	County.27047	-0.122251	-0.422872	0.196161	0.884926	0.655162	1.21672	0.2232
	County.27049	-0.0781514	-0.367957	0.210438	0.924824	0.692147	1.23422	0.3068
	County.27051	-0.0425072	-0.438535	0.359023	0.958384	0.64498	1.43193	0.426
	County.27053	-0.0480103	-0.285762	0.208933	0.953124	0.751441	1.23236	0.3429
	County.27055	0.219592	-0.108712	0.567905	1.24557	0.896989	1.76457	0.1014
	County.27057	0.0329075	-0.332731	0.374982	1.03345	0.716963	1.45496	0.4277
	County.27059	0.113953	-0.222203	0.436048	1.1207	0.800753	1.54658	0.2545
	County.27061	0.051028	-0.270991	0.370677	1.05235	0.762623	1.44871	0.3776
	County.27063	0.151681	-0.230099	0.534922	1.16379	0.794455	1.70731	0.2164
	County.27065	0.049663	-0.316869	0.436278	1.05092	0.728426	1.54694	0.3983
	County.27067	0.0114339	-0.333977	0.366399	1.0115	0.716071	1.44253	0.4729
	County.27069	0.0154311	-0.379582	0.396796	1.01555	0.684147	1.48705	0.4661
	County.27071	0.126282	-0.274344	0.503745	1.1346	0.760071	1.65491	0.2616
	County.27073	0.0382998	-0.346001	0.45346	1.03904	0.707512	1.57375	0.4262
[truncated: 1,775 more rows]

## Sheet: Denmark Analysis 
Term	Estimate	Conf.lower	Conf.higher	Exp(estimate)	Exp(conf.lower)	Exp(conf.higher)	Std.error	Statistic	P.value	Model	Phenotype		Model 0: Crude model with 7 groups
CO_mean_cat_2	0.239119	0.0242875	0.453951	1.27013	1.02458	1.57452	0.10961	2.18155	0.0291431	0	bipolar		Model 1: Model 0 + Calendar time using splines
CO_mean_cat_3	0.254409	-0.00105526	0.509873	1.2897	0.998945	1.66508	0.130341	1.95187	0.0509539	0	bipolar		Model 2: Model 1 + Sex
CO_mean_cat_4	0.328398	0.0389938	0.617803	1.38874	1.03976	1.85485	0.147658	2.22405	0.0261454	0	bipolar		Model 3: Model 2 (Restricted to subset of population with non-missing covariates)
CO_mean_cat_5	0.435913	0.119861	0.751965	1.54637	1.12734	2.12116	0.161254	2.70327	0.00686611	0	bipolar		Model 4: Model 3 + Socioeconomic status + Urbanization
CO_mean_cat_6	0.548913	0.199558	0.898268	1.73137	1.22086	2.45535	0.178245	3.07954	0.00207324	0	bipolar
CO_mean_cat_7	0.618126	0.223292	1.01296	1.85545	1.25019	2.75374	0.201449	3.06839	0.00215215	0	bipolar
EC_mean_cat_2	0.322581	0.149211	0.495952	1.38069	1.16092	1.64206	0.088456	3.6468	0.00026553	0	bipolar
EC_mean_cat_3	0.339018	0.111971	0.566064	1.40357	1.11848	1.76132	0.115842	2.92655	0.00342746	0	bipolar
EC_mean_cat_4	0.461719	0.187831	0.735608	1.5868	1.20663	2.08675	0.139742	3.30409	0.000952844	0	bipolar
EC_mean_cat_5	0.356252	0.0297585	0.682746	1.42797	1.03021	1.97931	0.166581	2.13861	0.0324676	0	bipolar
EC_mean_cat_6	0.426149	0.0324169	0.819881	1.53135	1.03295	2.27023	0.200887	2.12133	0.0338938	0	bipolar
EC_mean_cat_7	0.356333	-0.124769	0.837436	1.42808	0.8827	2.31044	0.245465	1.45167	0.146595	0	bipolar
NH4_mean_cat_2	-0.0589202	-0.411057	0.293217	0.942782	0.662949	1.34073	0.179665	-0.327945	0.742954	0	bipolar
NH4_mean_cat_3	-0.264735	-0.679654	0.150184	0.767409	0.506792	1.16205	0.211697	-1.25054	0.211104	0	bipolar
NH4_mean_cat_4	-0.296936	-0.74569	0.151819	0.743092	0.474407	1.16395	0.22896	-1.29689	0.194671	0	bipolar
NH4_mean_cat_5	-0.344103	-0.819932	0.131726	0.708856	0.440462	1.1408	0.242774	-1.41738	0.156373	0	bipolar
NH4_mean_cat_6	-0.34028	-0.840109	0.159549	0.711571	0.431663	1.17298	0.25502	-1.33433	0.182096	0	bipolar
NH4_mean_cat_7	-0.372202	-0.896242	0.151837	0.689215	0.4081	1.16397	0.267372	-1.39208	0.163899	0	bipolar
NO2_mean_cat_2	-0.0544392	-0.419828	0.310949	0.947016	0.65716	1.36472	0.186426	-0.292015	0.770275	0	bipolar
NO2_mean_cat_3	0.117	-0.310807	0.544807	1.12412	0.732855	1.72428	0.218273	0.536027	0.59194	0	bipolar
NO2_mean_cat_4	0.186744	-0.283285	0.656772	1.20532	0.753305	1.92856	0.239815	0.778698	0.436158	0	bipolar
NO2_mean_cat_5	0.086551	-0.422993	0.596095	1.09041	0.655083	1.81502	0.259976	0.332919	0.739196	0	bipolar
NO2_mean_cat_6	-0.00489843	-0.554325	0.544528	0.995114	0.57446	1.72379	0.280325	-0.0174741	0.986058	0	bipolar
NO2_mean_cat_7	-0.311924	-0.896997	0.27315	0.732037	0.407792	1.3141	0.298512	-1.04493	0.296057	0	bipolar
NO3_mean_cat_2	0.410967	0.216408	0.605525	1.50828	1.24161	1.83221	0.0992665	4.14003	3.47256e-05	0	bipolar
NO3_mean_cat_3	0.690907	0.481966	0.899848	1.99552	1.61925	2.45923	0.106605	6.48103	9.11004e-11	0	bipolar
NO3_mean_cat_4	0.799492	0.577331	1.02165	2.22441	1.78128	2.77778	0.11335	7.05332	1.74695e-12	0	bipolar
NO3_mean_cat_5	0.823051	0.586668	1.05943	2.27744	1.79799	2.88474	0.120606	6.82432	8.83435e-12	0	bipolar
NO3_mean_cat_6	0.813143	0.563044	1.06324	2.25498	1.75601	2.89574	0.127604	6.3724	1.86087e-10	0	bipolar
NO3_mean_cat_7	0.715228	0.449379	0.981077	2.04465	1.56734	2.66733	0.13564	5.27299	1.34216e-07	0	bipolar
NOX_mean_cat_2	-0.000165773	-0.358851	0.358519	0.999834	0.698479	1.43121	0.183006	-0.000905834	0.999277	0	bipolar
NOX_mean_cat_3	0.0679136	-0.34178	0.477607	1.07027	0.710504	1.61221	0.209031	0.324897	0.745259	0	bipolar
NOX_mean_cat_4	-0.0251958	-0.46937	0.418978	0.975119	0.625396	1.52041	0.226624	-0.111179	0.911474	0	bipolar
NOX_mean_cat_5	0.100019	-0.374007	0.574045	1.10519	0.687972	1.77543	0.241855	0.41355	0.679204	0	bipolar
NOX_mean_cat_6	0.0339805	-0.46738	0.535341	1.03456	0.626642	1.70803	0.255801	0.13284	0.89432	0	bipolar
NOX_mean_cat_7	0.0810838	-0.436439	0.598607	1.08446	0.646334	1.81958	0.264047	0.307081	0.758782	0	bipolar
O3_mean_cat_2	-0.1817	-0.336784	-0.0266161	0.833852	0.714063	0.973735	0.0791259	-2.29634	0.0216564	0	bipolar
O3_mean_cat_3	-0.327055	-0.544654	-0.109456	0.721044	0.580042	0.896322	0.111022	-2.94586	0.00322059	0	bipolar
O3_mean_cat_4	-0.417782	-0.676838	-0.158727	0.658505	0.508221	0.853229	0.132174	-3.16086	0.00157304	0	bipolar
O3_mean_cat_5	-0.40819	-0.700498	-0.115882	0.664852	0.496338	0.89058	0.149139	-2.73697	0.00620078	0	bipolar
O3_mean_cat_6	-0.350575	-0.676599	-0.024552	0.704283	0.508343	0.975747	0.166342	-2.10756	0.0350687	0	bipolar
O3_mean_cat_7	-0.315125	-0.685954	0.0557046	0.729698	0.50361	1.05729	0.189202	-1.66555	0.095804	0	bipolar
OC_mean_cat_2	0.249188	0.0989159	0.399459	1.28298	1.10397	1.49102	0.0766706	3.2501	0.00115363	0	bipolar
OC_mean_cat_3	0.173703	-0.0227377	0.370143	1.1897	0.977519	1.44794	0.100226	1.7331	0.0830777	0	bipolar
OC_mean_cat_4	0.210558	-0.0254065	0.446522	1.23437	0.974914	1.56287	0.120392	1.74893	0.0803027	0	bipolar
OC_mean_cat_5	0.148742	-0.139089	0.436574	1.16037	0.87015	1.5474	0.146856	1.01285	0.311133	0	bipolar
OC_mean_cat_6	0.365926	0.0152272	0.716625	1.44185	1.01534	2.04751	0.178931	2.04506	0.0408485	0	bipolar
OC_mean_cat_7	0.621476	0.182033	1.06092	1.86167	1.19965	2.88902	0.22421	2.77185	0.00557387	0	bipolar
PM10_mean_cat_2	-0.029925	-0.297533	0.237683	0.970518	0.742648	1.26831	0.136537	-0.219171	0.826517	0	bipolar
PM10_mean_cat_3	-0.0743843	-0.39588	0.247111	0.928315	0.673088	1.28032	0.164031	-0.453477	0.650206	0	bipolar
PM10_mean_cat_4	-0.0130183	-0.374541	0.348505	0.987066	0.687605	1.41695	0.184454	-0.0705776	0.943734	0	bipolar
PM10_mean_cat_5	-0.119334	-0.518473	0.279805	0.887511	0.595429	1.32287	0.203646	-0.585987	0.557884	0	bipolar
PM10_mean_cat_6	-0.330839	-0.766803	0.105125	0.718321	0.464496	1.11085	0.222435	-1.48735	0.136922	0	bipolar
PM10_mean_cat_7	-0.246947	-0.720193	0.2263	0.781182	0.486658	1.25395	0.241457	-1.02274	0.306433	0	bipolar
PM25_mean_cat_2	-0.250859	-0.529875	0.0281565	0.778132	0.588678	1.02856	0.142358	-1.76218	0.0780394	0	bipolar
PM25_mean_cat_3	-0.43813	-0.801752	-0.0745086	0.645242	0.448542	0.928199	0.185525	-2.36157	0.0181975	0	bipolar
PM25_mean_cat_4	-0.57267	-0.999015	-0.146325	0.564018	0.368242	0.863877	0.217527	-2.63264	0.00847242	0	bipolar
PM25_mean_cat_5	-0.722805	-1.19607	-0.249536	0.485389	0.302379	0.779162	0.241468	-2.99338	0.00275909	0	bipolar
PM25_mean_cat_6	-0.68217	-1.19427	-0.170073	0.505519	0.302926	0.843603	0.261279	-2.61089	0.0090307	0	bipolar
PM25_mean_cat_7	-0.638258	-1.19235	-0.0841624	0.528212	0.303506	0.919282	0.282707	-2.25767	0.0239665	0	bipolar
SEASALT_mean_cat_2	0.0711873	-0.0569608	0.199335	1.07378	0.944631	1.22059	0.0653829	1.08878	0.276253	0	bipolar
SEASALT_mean_cat_3	0.366842	0.221821	0.511863	1.44317	1.24835	1.6684	0.0739918	4.95787	7.12695e-07	0	bipolar
SEASALT_mean_cat_4	0.653087	0.500919	0.805255	1.92146	1.65024	2.23727	0.0776384	8.41191	4.03387e-17	0	bipolar
SEASALT_mean_cat_5	0.589089	0.426928	0.751251	1.80235	1.53254	2.11965	0.0827369	7.12003	1.07906e-12	0	bipolar
SEASALT_mean_cat_6	0.617723	0.446032	0.789413	1.8547	1.5621	2.2021	0.0875987	7.05174	1.76699e-12	0	bipolar
SEASALT_mean_cat_7	0.874199	0.682936	1.06546	2.39696	1.97968	2.90218	0.0975853	8.95831	3.29699e-19	0	bipolar
sia_mean_cat_2	-0.310116	-0.722751	0.102519	0.733362	0.485415	1.10796	0.210532	-1.47301	0.140747	0	bipolar
sia_mean_cat_3	-0.361526	-0.867766	0.144714	0.696613	0.419888	1.15571	0.258291	-1.39969	0.161607	0	bipolar
sia_mean_cat_4	-0.563338	-1.11647	-0.0102036	0.569305	0.327433	0.989848	0.282217	-1.99612	0.045921	0	bipolar
sia_mean_cat_5	-0.589787	-1.17946	-0.000114707	0.554445	0.307445	0.999885	0.300859	-1.96035	0.0499555	0	bipolar
sia_mean_cat_6	-0.598191	-1.21844	0.0220587	0.549805	0.295691	1.0223	0.31646	-1.89026	0.0587233	0	bipolar
sia_mean_cat_7	-0.795022	-1.4463	-0.143743	0.451571	0.23544	0.86611	0.332291	-2.39255	0.0167319	0	bipolar
SO2_mean_cat_2	0.117223	-0.170158	0.404604	1.12437	0.843532	1.49871	0.146626	0.79947	0.424018	0	bipolar
SO2_mean_cat_3	0.0417753	-0.30748	0.391031	1.04266	0.735297	1.4785	0.178195	0.234436	0.814647	0	bipolar
SO2_mean_cat_4	-0.207191	-0.604098	0.189716	0.812865	0.546567	1.20891	0.202507	-1.02313	0.306248	0	bipolar
SO2_mean_cat_5	-0.372005	-0.805612	0.0616015	0.689351	0.446814	1.06354	0.221232	-1.68152	0.0926627	0	bipolar
SO2_mean_cat_6	-0.552087	-1.01601	-0.088163	0.575747	0.362036	0.915612	0.2367	-2.33243	0.019678	0	bipolar
SO2_mean_cat_7	-0.678138	-1.17407	-0.182202	0.507561	0.309105	0.833433	0.253033	-2.68004	0.00736138	0	bipolar
SO4_mean_cat_2	-0.113609	-0.486281	0.259063	0.892607	0.614909	1.29572	0.190142	-0.597496	0.550177	0	bipolar
SO4_mean_cat_3	-0.160002	-0.618149	0.298145	0.852142	0.538941	1.34736	0.233753	-0.684492	0.493664	0	bipolar
SO4_mean_cat_4	-0.0144084	-0.519693	0.490877	0.985695	0.594703	1.63375	0.257803	-0.0558892	0.95543	0	bipolar
SO4_mean_cat_5	-0.0100738	-0.553411	0.533264	0.989977	0.574985	1.70449	0.277218	-0.0363389	0.971012	0	bipolar
SO4_mean_cat_6	-0.185386	-0.763753	0.392981	0.830783	0.465914	1.48139	0.295091	-0.628235	0.52985	0	bipolar
SO4_mean_cat_7	-0.328963	-0.937826	0.279901	0.71967	0.391478	1.323	0.31065	-1.05895	0.289623	0	bipolar
CO_mean_cat_2	0.29774	0.0814329	0.514047	1.34681	1.08484	1.67204	0.110363	2.69783	0.00697932	1	bipolar
CO_mean_cat_3	0.357882	0.0995576	0.616206	1.4303	1.10468	1.85189	0.1318	2.71533	0.00662097	1	bipolar
CO_mean_cat_4	0.476546	0.183798	0.769294	1.6105	1.20177	2.15824	0.149364	3.1905	0.00142025	1	bipolar
CO_mean_cat_5	0.641231	0.320604	0.961858	1.89882	1.37796	2.61655	0.163588	3.91979	8.86277e-05	1	bipolar
CO_mean_cat_6	0.794869	0.439816	1.14992	2.21415	1.55242	3.15795	0.181153	4.38783	1.14486e-05	1	bipolar
CO_mean_cat_7	0.895018	0.49335	1.29669	2.44738	1.63779	3.65716	0.204936	4.3673	1.25793e-05	1	bipolar
EC_mean_cat_2	0.303978	0.129642	0.478314	1.35524	1.13842	1.61335	0.0889485	3.41746	0.000632075	1	bipolar
EC_mean_cat_3	0.2925	0.0633139	0.521687	1.33977	1.06536	1.68487	0.116934	2.50141	0.0123699	1	bipolar
EC_mean_cat_4	0.382764	0.106537	0.658991	1.46633	1.11242	1.93284	0.140935	2.7159	0.00660962	1	bipolar
EC_mean_cat_5	0.264416	-0.0645197	0.593353	1.30267	0.937518	1.81005	0.167828	1.57552	0.115136	1	bipolar
EC_mean_cat_6	0.313088	-0.0826996	0.708875	1.36764	0.920628	2.0317	0.201936	1.55043	0.121038	1	bipolar
EC_mean_cat_7	0.218554	-0.264206	0.701313	1.24428	0.767815	2.0164	0.246311	0.887309	0.374912	1	bipolar
NH4_mean_cat_2	0.00378845	-0.351224	0.358801	1.0038	0.703826	1.43161	0.181132	0.0209154	0.983313	1	bipolar
NH4_mean_cat_3	-0.156221	-0.577322	0.264881	0.85537	0.5614	1.30328	0.214852	-0.72711	0.467159	1	bipolar
NH4_mean_cat_4	-0.13509	-0.592712	0.322532	0.873638	0.552826	1.38062	0.233485	-0.57858	0.562873	1	bipolar
NH4_mean_cat_5	-0.0960951	-0.583796	0.391606	0.908378	0.557777	1.47935	0.248832	-0.386185	0.69936	1	bipolar
NH4_mean_cat_6	0.0167946	-0.498523	0.532112	1.01694	0.607427	1.70252	0.262922	0.0638768	0.949068	1	bipolar
NH4_mean_cat_7	0.0341914	-0.50701	0.575393	1.03478	0.602294	1.77783	0.276128	0.123825	0.901454	1	bipolar
NO2_mean_cat_2	-0.0911819	-0.454846	0.272482	0.912852	0.634546	1.31322	0.185546	-0.491424	0.623126	1	bipolar
NO2_mean_cat_3	0.0547365	-0.37182	0.481293	1.05626	0.689478	1.61817	0.217635	0.251506	0.801423	1	bipolar
NO2_mean_cat_4	0.0898333	-0.379796	0.559462	1.09399	0.684001	1.74973	0.239611	0.374913	0.707725	1	bipolar
NO2_mean_cat_5	-0.0419724	-0.551772	0.467827	0.958896	0.575928	1.59652	0.260107	-0.161366	0.871805	1	bipolar
NO2_mean_cat_6	-0.170532	-0.721087	0.380023	0.843216	0.486223	1.46232	0.280901	-0.607091	0.54379	1	bipolar
NO2_mean_cat_7	-0.497353	-1.08392	0.0892139	0.608138	0.338267	1.09331	0.299275	-1.66186	0.0965401	1	bipolar
NO3_mean_cat_2	0.295763	0.0932012	0.498324	1.34415	1.09768	1.64596	0.10335	2.86177	0.00421283	1	bipolar
NO3_mean_cat_3	0.475656	0.249546	0.701765	1.60907	1.28344	2.01731	0.115364	4.12308	3.73833e-05	1	bipolar
NO3_mean_cat_4	0.505115	0.257161	0.753068	1.65718	1.29325	2.12351	0.126509	3.99271	6.53215e-05	1	bipolar
NO3_mean_cat_5	0.446669	0.174565	0.718772	1.5631	1.19073	2.05191	0.138831	3.21736	0.00129377	1	bipolar
NO3_mean_cat_6	0.306813	0.00838968	0.605236	1.35909	1.00842	1.83169	0.15226	2.01507	0.0438978	1	bipolar
NO3_mean_cat_7	0.0475498	-0.283073	0.378173	1.0487	0.753465	1.45961	0.168688	0.28188	0.778036	1	bipolar
NOX_mean_cat_2	-0.0128603	-0.370201	0.34448	0.987222	0.690596	1.41126	0.18232	-0.0705372	0.943766	1	bipolar
NOX_mean_cat_3	0.0519719	-0.356607	0.460551	1.05335	0.700047	1.58495	0.208463	0.249311	0.803121	1	bipolar
NOX_mean_cat_4	-0.0336317	-0.477161	0.409898	0.966928	0.620542	1.50666	0.226295	-0.148619	0.881854	1	bipolar
NOX_mean_cat_5	0.108633	-0.364988	0.582254	1.11475	0.694205	1.79007	0.241648	0.449551	0.653034	1	bipolar
NOX_mean_cat_6	0.0559693	-0.445236	0.557175	1.05757	0.640673	1.74573	0.255722	0.218868	0.826753	1	bipolar
NOX_mean_cat_7	0.117878	-0.399538	0.635294	1.12511	0.67063	1.88758	0.263993	0.44652	0.655222	1	bipolar
O3_mean_cat_2	-0.159745	-0.315231	-0.0042583	0.852361	0.72962	0.995751	0.0793313	-2.01364	0.0440472	1	bipolar
O3_mean_cat_3	-0.291883	-0.510236	-0.0735298	0.746856	0.600354	0.929108	0.111407	-2.61998	0.00879359	1	bipolar
O3_mean_cat_4	-0.36952	-0.629525	-0.109516	0.691066	0.532845	0.896268	0.132658	-2.78552	0.00534422	1	bipolar
O3_mean_cat_5	-0.35275	-0.64622	-0.0592794	0.702753	0.524023	0.942443	0.149733	-2.35587	0.0184796	1	bipolar
O3_mean_cat_6	-0.294613	-0.622146	0.0329193	0.744819	0.536791	1.03347	0.167112	-1.76297	0.0779049	1	bipolar
O3_mean_cat_7	-0.246752	-0.618929	0.125425	0.781334	0.538521	1.13363	0.18989	-1.29945	0.19379	1	bipolar
OC_mean_cat_2	0.209503	0.0594857	0.35952	1.23307	1.06129	1.43264	0.0765409	2.73714	0.00619759	1	bipolar
OC_mean_cat_3	0.133778	-0.0623194	0.329876	1.14314	0.939583	1.3908	0.100052	1.33709	0.181192	1	bipolar
OC_mean_cat_4	0.17615	-0.0598827	0.412183	1.19262	0.941875	1.51011	0.120427	1.46271	0.143547	1	bipolar
OC_mean_cat_5	0.0868116	-0.202032	0.375655	1.09069	0.817069	1.45594	0.147372	0.589065	0.555817	1	bipolar
OC_mean_cat_6	0.268394	-0.0842399	0.621027	1.30786	0.919211	1.86084	0.179918	1.49175	0.135764	1	bipolar
OC_mean_cat_7	0.503707	0.0622152	0.945198	1.65484	1.06419	2.57332	0.225255	2.23616	0.0253411	1	bipolar
PM10_mean_cat_2	-0.0295786	-0.301121	0.241964	0.970855	0.739988	1.27375	0.138545	-0.213495	0.830941	1	bipolar
PM10_mean_cat_3	-0.0809099	-0.40792	0.246101	0.922277	0.665032	1.27903	0.166845	-0.48494	0.627719	1	bipolar
PM10_mean_cat_4	-0.00125414	-0.369077	0.366568	0.998747	0.691372	1.44278	0.187668	-0.00668274	0.994668	1	bipolar
PM10_mean_cat_5	-0.0518477	-0.45718	0.353485	0.949473	0.633066	1.42402	0.206806	-0.250707	0.802041	1	bipolar
PM10_mean_cat_6	-0.18124	-0.623462	0.260983	0.834235	0.536085	1.29821	0.225628	-0.803268	0.42182	1	bipolar
PM10_mean_cat_7	-0.0167727	-0.498282	0.464737	0.983367	0.607573	1.5916	0.245673	-0.0682724	0.945569	1	bipolar
PM25_mean_cat_2	-0.182604	-0.466694	0.101487	0.833098	0.627072	1.10682	0.144947	-1.2598	0.207742	1	bipolar
PM25_mean_cat_3	-0.301248	-0.674966	0.0724699	0.739894	0.509174	1.07516	0.190676	-1.5799	0.114131	1	bipolar
PM25_mean_cat_4	-0.413068	-0.850536	0.0243994	0.661617	0.427186	1.0247	0.223202	-1.85065	0.0642201	1	bipolar
PM25_mean_cat_5	-0.587003	-1.06783	-0.106174	0.555991	0.343753	0.899268	0.245325	-2.39275	0.0167225	1	bipolar
PM25_mean_cat_6	-0.569698	-1.08561	-0.0537883	0.565696	0.337696	0.947633	0.263224	-2.16431	0.0304407	1	bipolar
PM25_mean_cat_7	-0.476448	-1.03429	0.0813932	0.620985	0.355479	1.0848	0.284618	-1.67399	0.0941325	1	bipolar
SEASALT_mean_cat_2	0.0874592	-0.0414655	0.216384	1.0914	0.959382	1.24158	0.0657791	1.32959	0.183654	1	bipolar
SEASALT_mean_cat_3	0.396243	0.249485	0.543001	1.48623	1.28336	1.72116	0.0748778	5.29186	1.21079e-07	1	bipolar
SEASALT_mean_cat_4	0.700889	0.546545	0.855234	2.01554	1.72727	2.35192	0.0787487	8.90033	5.56796e-19	1	bipolar
SEASALT_mean_cat_5	0.661186	0.495938	0.826435	1.93709	1.64204	2.28516	0.0843121	7.84213	4.42967e-15	1	bipolar
SEASALT_mean_cat_6	0.691932	0.517743	0.866122	1.99757	1.67824	2.37767	0.0888739	7.78555	6.94094e-15	1	bipolar
SEASALT_mean_cat_7	0.942379	0.748677	1.13608	2.56608	2.1142	3.11454	0.0988292	9.53543	1.49263e-21	1	bipolar
sia_mean_cat_2	-0.234324	-0.648726	0.180077	0.791105	0.522711	1.19731	0.211433	-1.10827	0.267746	1	bipolar
sia_mean_cat_3	-0.197528	-0.709984	0.314927	0.820757	0.491652	1.37016	0.261462	-0.755477	0.449963	1	bipolar
sia_mean_cat_4	-0.298504	-0.863131	0.266124	0.741928	0.421839	1.3049	0.28808	-1.03618	0.300118	1	bipolar
sia_mean_cat_5	-0.220766	-0.826027	0.384494	0.801904	0.437785	1.46887	0.308812	-0.714889	0.474678	1	bipolar
sia_mean_cat_6	-0.150493	-0.789171	0.488186	0.860284	0.454221	1.62936	0.325862	-0.461829	0.644204	1	bipolar
sia_mean_cat_7	-0.25736	-0.930468	0.415749	0.77309	0.394369	1.51551	0.343429	-0.749382	0.453627	1	bipolar
SO2_mean_cat_2	0.164765	-0.124398	0.453927	1.17912	0.883028	1.57448	0.147535	1.11679	0.264086	1	bipolar
SO2_mean_cat_3	0.133976	-0.22029	0.488242	1.14337	0.802286	1.62945	0.180751	0.741217	0.458562	1	bipolar
SO2_mean_cat_4	-0.0503653	-0.455714	0.354983	0.950882	0.633995	1.42616	0.206814	-0.243529	0.807596	1	bipolar
SO2_mean_cat_5	-0.147375	-0.5916	0.29685	0.86297	0.553441	1.34561	0.226649	-0.650233	0.515541	1	bipolar
SO2_mean_cat_6	-0.267423	-0.744132	0.209285	0.765349	0.475147	1.2328	0.243223	-1.0995	0.271551	1	bipolar
SO2_mean_cat_7	-0.293871	-0.806533	0.218791	0.745373	0.446403	1.24457	0.261567	-1.1235	0.261225	1	bipolar
SO4_mean_cat_2	0.122738	-0.348209	0.593686	1.13059	0.705951	1.81065	0.240284	0.510805	0.609487	1	bipolar
SO4_mean_cat_3	0.0674347	-0.527094	0.661963	1.06976	0.590318	1.93859	0.303337	0.22231	0.824073	1	bipolar
SO4_mean_cat_4	0.167734	-0.483114	0.818581	1.18262	0.616859	2.26728	0.332071	0.505113	0.613479	1	bipolar
SO4_mean_cat_5	0.299019	-0.390046	0.988085	1.34854	0.677026	2.68608	0.35157	0.850525	0.395033	1	bipolar
SO4_mean_cat_6	0.382677	-0.334564	1.09992	1.4662	0.71565	3.00392	0.365946	1.04572	0.29569	1	bipolar
SO4_mean_cat_7	0.412323	-0.330998	1.15564	1.51032	0.718207	3.17606	0.379252	1.0872	0.276949	1	bipolar
CO_mean_cat_2	0.297653	0.0812625	0.514043	1.34669	1.08466	1.67204	0.110405	2.696	0.00701771	2	bipolar
CO_mean_cat_3	0.357361	0.0989973	0.615725	1.42955	1.10406	1.851	0.131821	2.71096	0.00670878	2	bipolar
CO_mean_cat_4	0.477014	0.184258	0.769771	1.61126	1.20233	2.15927	0.149369	3.19354	0.0014054	2	bipolar
CO_mean_cat_5	0.641244	0.320567	0.961922	1.89884	1.37791	2.61672	0.163614	3.91925	8.88253e-05	2	bipolar
CO_mean_cat_6	0.795062	0.439943	1.15018	2.21458	1.55262	3.15877	0.181187	4.38809	1.14351e-05	2	bipolar
CO_mean_cat_7	0.892398	0.490671	1.29412	2.44097	1.63341	3.6478	0.204966	4.35388	1.3375e-05	2	bipolar
EC_mean_cat_2	0.303685	0.129376	0.477993	1.35484	1.13812	1.61283	0.0889346	3.4147	0.00063853	2	bipolar
EC_mean_cat_3	0.291014	0.0618594	0.520168	1.33778	1.06381	1.68231	0.116918	2.48905	0.0128085	2	bipolar
EC_mean_cat_4	0.380651	0.104446	0.656856	1.46324	1.1101	1.92872	0.140924	2.70112	0.00691073	2	bipolar
EC_mean_cat_5	0.262778	-0.0661395	0.591696	1.30054	0.936	1.80705	0.167818	1.56585	0.117384	2	bipolar
EC_mean_cat_6	0.313183	-0.0826398	0.709007	1.36777	0.920683	2.03197	0.201954	1.55076	0.120958	2	bipolar
EC_mean_cat_7	0.222028	-0.260847	0.704902	1.24861	0.770399	2.02365	0.246369	0.901199	0.367482	2	bipolar
NH4_mean_cat_2	0.00548162	-0.349101	0.360064	1.0055	0.705322	1.43342	0.180913	0.0302998	0.975828	2	bipolar
NH4_mean_cat_3	-0.153616	-0.574311	0.26708	0.857602	0.563093	1.30614	0.214645	-0.715674	0.474192	2	bipolar
NH4_mean_cat_4	-0.1315	-0.588746	0.325746	0.87678	0.555023	1.38506	0.233293	-0.563667	0.572981	2	bipolar
NH4_mean_cat_5	-0.0911256	-0.578476	0.396225	0.912903	0.560752	1.4862	0.248653	-0.366477	0.714009	2	bipolar
NH4_mean_cat_6	0.0224732	-0.492484	0.537431	1.02273	0.611106	1.7116	0.262738	0.0855347	0.931836	2	bipolar
NH4_mean_cat_7	0.0382156	-0.50265	0.579081	1.03896	0.604926	1.7844	0.275957	0.138484	0.889858	2	bipolar
NO2_mean_cat_2	-0.0932069	-0.456831	0.270417	0.911005	0.633287	1.31051	0.185526	-0.502393	0.615391	2	bipolar
NO2_mean_cat_3	0.0574059	-0.369235	0.484047	1.05909	0.691263	1.62263	0.217678	0.26372	0.791996	2	bipolar
NO2_mean_cat_4	0.0857781	-0.384014	0.55557	1.08956	0.681122	1.74293	0.239694	0.357865	0.720445	2	bipolar
NO2_mean_cat_5	-0.0485132	-0.558518	0.461491	0.952645	0.572056	1.58644	0.260211	-0.186438	0.852101	2	bipolar
NO2_mean_cat_6	-0.174791	-0.725503	0.375921	0.839633	0.484081	1.45633	0.280981	-0.622074	0.533893	2	bipolar
NO2_mean_cat_7	-0.499634	-1.08639	0.0871242	0.606753	0.337432	1.09103	0.299372	-1.66894	0.0951291	2	bipolar
NO3_mean_cat_2	0.296196	0.093609	0.498782	1.34473	1.09813	1.64671	0.103362	2.8656	0.00416216	2	bipolar
NO3_mean_cat_3	0.474565	0.248425	0.700706	1.60732	1.282	2.01517	0.11538	4.11306	3.90445e-05	2	bipolar
NO3_mean_cat_4	0.505785	0.257776	0.753795	1.65829	1.29405	2.12505	0.126538	3.99711	6.41218e-05	2	bipolar
NO3_mean_cat_5	0.446595	0.174444	0.718746	1.56298	1.19058	2.05186	0.138855	3.21627	0.0012987	2	bipolar
NO3_mean_cat_6	0.306627	0.00816204	0.605093	1.35883	1.0082	1.83142	0.152281	2.01356	0.0440555	2	bipolar
NO3_mean_cat_7	0.0481299	-0.282563	0.378822	1.04931	0.753849	1.46056	0.168724	0.285258	0.775446	2	bipolar
NOX_mean_cat_2	-0.0118453	-0.369187	0.345497	0.988225	0.691296	1.41269	0.182321	-0.0649695	0.948198	2	bipolar
NOX_mean_cat_3	0.0508871	-0.35776	0.459534	1.0522	0.699241	1.58334	0.208497	0.244066	0.80718	2	bipolar
NOX_mean_cat_4	-0.0311253	-0.474736	0.412486	0.969354	0.622049	1.51057	0.226336	-0.137518	0.890621	2	bipolar
NOX_mean_cat_5	0.111785	-0.361961	0.585531	1.11827	0.69631	1.79594	0.241712	0.462473	0.643742	2	bipolar
NOX_mean_cat_6	0.0568327	-0.444469	0.558135	1.05848	0.641164	1.74741	0.255771	0.222202	0.824157	2	bipolar
NOX_mean_cat_7	0.117515	-0.399988	0.635018	1.1247	0.670328	1.88706	0.264037	0.445069	0.65627	2	bipolar
O3_mean_cat_2	-0.158554	-0.314109	-0.00300039	0.853376	0.73044	0.997004	0.0793658	-1.99777	0.0457418	2	bipolar
O3_mean_cat_3	-0.291748	-0.510088	-0.0734081	0.746957	0.600443	0.929222	0.1114	-2.61892	0.00882077	2	bipolar
O3_mean_cat_4	-0.370959	-0.630984	-0.110934	0.690072	0.532068	0.894998	0.132668	-2.79614	0.00517167	2	bipolar
O3_mean_cat_5	-0.355453	-0.648951	-0.0619544	0.700856	0.522594	0.939926	0.149747	-2.37369	0.0176112	2	bipolar
O3_mean_cat_6	-0.29683	-0.624435	0.0307753	0.743171	0.535564	1.03125	0.167148	-1.77584	0.0757585	2	bipolar
O3_mean_cat_7	-0.248519	-0.620802	0.123764	0.779955	0.537513	1.13175	0.189944	-1.30838	0.190743	2	bipolar
OC_mean_cat_2	0.207344	0.0573296	0.357358	1.23041	1.059	1.42955	0.0765393	2.70898	0.00674894	2	bipolar
OC_mean_cat_3	0.131452	-0.0646632	0.327567	1.14048	0.937383	1.38759	0.100061	1.31372	0.188939	2	bipolar
OC_mean_cat_4	0.175781	-0.0602918	0.411854	1.19218	0.94149	1.50961	0.120448	1.4594	0.144455	2	bipolar
OC_mean_cat_5	0.0860456	-0.202851	0.374943	1.08986	0.8164	1.45491	0.147399	0.583759	0.559382	2	bipolar
OC_mean_cat_6	0.267663	-0.0850567	0.620382	1.30691	0.91846	1.85964	0.179962	1.48733	0.136928	2	bipolar
OC_mean_cat_7	0.500391	0.0587423	0.942041	1.64937	1.0605	2.56521	0.225335	2.22065	0.0263745	2	bipolar
PM10_mean_cat_2	-0.0310846	-0.302523	0.240354	0.969394	0.738951	1.2717	0.138492	-0.224451	0.822406	2	bipolar
PM10_mean_cat_3	-0.0830877	-0.410019	0.243844	0.92027	0.663638	1.27614	0.166805	-0.498114	0.618404	2	bipolar
PM10_mean_cat_4	-0.00466634	-0.37249	0.363158	0.995345	0.689016	1.43786	0.187669	-0.0248648	0.980163	2	bipolar
PM10_mean_cat_5	-0.0538045	-0.459175	0.351566	0.947617	0.631805	1.42129	0.206826	-0.260144	0.794752	2	bipolar
PM10_mean_cat_6	-0.181917	-0.624157	0.260322	0.83367	0.535713	1.29735	0.225637	-0.806241	0.420104	2	bipolar
PM10_mean_cat_7	-0.0183043	-0.499818	0.463209	0.981862	0.606641	1.58917	0.245675	-0.0745063	0.940608	2	bipolar
PM25_mean_cat_2	-0.182763	-0.466891	0.101366	0.832966	0.626948	1.10668	0.144966	-1.26072	0.207408	2	bipolar
PM25_mean_cat_3	-0.299146	-0.672905	0.0746128	0.741451	0.510224	1.07747	0.190697	-1.5687	0.116718	2	bipolar
PM25_mean_cat_4	-0.409411	-0.846891	0.0280693	0.664041	0.428746	1.02847	0.223208	-1.83421	0.0666228	2	bipolar
PM25_mean_cat_5	-0.585483	-1.06636	-0.104601	0.556837	0.344258	0.900684	0.245352	-2.38629	0.0170191	2	bipolar
PM25_mean_cat_6	-0.569159	-1.08511	-0.0532117	0.566001	0.337866	0.948179	0.263243	-2.1621	0.0306102	2	bipolar
PM25_mean_cat_7	-0.47544	-1.03334	0.0824616	0.621611	0.355816	1.08596	0.284649	-1.67027	0.0948663	2	bipolar
SEASALT_mean_cat_2	0.0878603	-0.0410932	0.216814	1.09184	0.95974	1.24211	0.0657938	1.33539	0.181749	2	bipolar
SEASALT_mean_cat_3	0.396739	0.249955	0.543523	1.48697	1.28397	1.72206	0.0748912	5.29754	1.17376e-07	2	bipolar
SEASALT_mean_cat_4	0.701199	0.546796	0.855603	2.01617	1.72771	2.35279	0.0787787	8.90088	5.54076e-19	2	bipolar
SEASALT_mean_cat_5	0.661576	0.496297	0.826854	1.93784	1.64263	2.28612	0.0843273	7.84534	4.31789e-15	2	bipolar
SEASALT_mean_cat_6	0.692591	0.518355	0.866826	1.99889	1.67926	2.37935	0.0888974	7.7909	6.65352e-15	2	bipolar
SEASALT_mean_cat_7	0.941816	0.748074	1.13556	2.56464	2.11293	3.11291	0.0988502	9.52772	1.60779e-21	2	bipolar
sia_mean_cat_2	-0.232012	-0.645856	0.181833	0.792937	0.524214	1.19941	0.211149	-1.09881	0.271853	2	bipolar
sia_mean_cat_3	-0.196484	-0.708488	0.31552	0.821614	0.492388	1.37097	0.261231	-0.752146	0.451963	2	bipolar
sia_mean_cat_4	-0.297818	-0.862069	0.266433	0.742436	0.422287	1.3053	0.287889	-1.03449	0.300907	2	bipolar
sia_mean_cat_5	-0.219703	-0.82466	0.385255	0.802757	0.438384	1.46999	0.308658	-0.711801	0.476588	2	bipolar
sia_mean_cat_6	-0.15069	-0.789051	0.487671	0.860114	0.454275	1.62852	0.325701	-0.462665	0.643605	2	bipolar
sia_mean_cat_7	-0.257598	-0.93048	0.415285	0.772906	0.394364	1.5148	0.343314	-0.750327	0.453058	2	bipolar
SO2_mean_cat_2	0.163765	-0.125461	0.452991	1.17794	0.882091	1.57301	0.147567	1.10977	0.267098	2	bipolar
SO2_mean_cat_3	0.131733	-0.222623	0.486089	1.1408	0.800416	1.62594	0.180797	0.728622	0.466233	2	bipolar
SO2_mean_cat_4	-0.0528112	-0.458174	0.352551	0.948559	0.632438	1.42269	0.206821	-0.255347	0.798455	2	bipolar
SO2_mean_cat_5	-0.150857	-0.595109	0.293394	0.85997	0.551503	1.34097	0.226663	-0.665558	0.505694	2	bipolar
SO2_mean_cat_6	-0.267625	-0.744344	0.209093	0.765194	0.475046	1.23256	0.243228	-1.1003	0.271199	2	bipolar
SO2_mean_cat_7	-0.295538	-0.808188	0.217112	0.744131	0.445665	1.24248	0.261561	-1.1299	0.258518	2	bipolar
SO4_mean_cat_2	0.120519	-0.350389	0.591426	1.12808	0.704414	1.80656	0.240263	0.501611	0.615941	2	bipolar
SO4_mean_cat_3	0.0646696	-0.529922	0.659261	1.06681	0.588651	1.93336	0.303369	0.213172	0.831193	2	bipolar
SO4_mean_cat_4	0.163967	-0.486936	0.814869	1.17817	0.614507	2.25888	0.332099	0.493728	0.621498	2	bipolar
SO4_mean_cat_5	0.296179	-0.392928	0.985286	1.34471	0.675077	2.67858	0.351592	0.842394	0.399567	2	bipolar
SO4_mean_cat_6	0.377864	-0.339402	1.09513	1.45916	0.712196	2.98957	0.365959	1.03253	0.301823	2	bipolar
SO4_mean_cat_7	0.41181	-0.331558	1.15518	1.50955	0.717805	3.17458	0.379276	1.08578	0.277577	2	bipolar
CO_mean_cat_2	0.292211	0.0695906	0.514832	1.33939	1.07207	1.67336	0.113584	2.57264	0.0100925	3	bipolar
CO_mean_cat_3	0.357786	0.0902754	0.625296	1.43016	1.09448	1.8688	0.136487	2.62138	0.00875737	3	bipolar
CO_mean_cat_4	0.526464	0.222827	0.8301	1.69294	1.2496	2.29355	0.154919	3.39831	0.000678038	3	bipolar
CO_mean_cat_5	0.669851	0.33635	1.00335	1.95395	1.39983	2.72741	0.170156	3.93668	8.26175e-05	3	bipolar
CO_mean_cat_6	0.854751	0.4848	1.2247	2.35079	1.62385	3.40315	0.188754	4.52839	5.9435e-06	3	bipolar
CO_mean_cat_7	0.924752	0.504902	1.3446	2.52124	1.65682	3.83666	0.214213	4.31697	1.58188e-05	3	bipolar
EC_mean_cat_2	0.255891	0.0751359	0.436647	1.29161	1.07803	1.54751	0.0922239	2.77468	0.00552569	3	bipolar
EC_mean_cat_3	0.226112	-0.011703	0.463926	1.25372	0.988365	1.59031	0.121336	1.86351	0.0623901	3	bipolar
EC_mean_cat_4	0.298156	0.0106966	0.585616	1.34737	1.01075	1.7961	0.146666	2.0329	0.042063	3	bipolar
EC_mean_cat_5	0.166875	-0.177087	0.510837	1.18161	0.837707	1.66669	0.175494	0.950887	0.341662	3	bipolar
EC_mean_cat_6	0.211471	-0.204752	0.627693	1.23549	0.81485	1.87328	0.212362	0.995802	0.319346	3	bipolar
EC_mean_cat_7	0.109766	-0.400967	0.620499	1.11602	0.669672	1.85986	0.260583	0.421233	0.673585	3	bipolar
NH4_mean_cat_2	0.186451	-0.194182	0.567084	1.20497	0.823508	1.76312	0.194204	0.960076	0.337017	3	bipolar
NH4_mean_cat_3	0.0162299	-0.431694	0.464154	1.01636	0.649408	1.59067	0.228537	0.0710165	0.943385	3	bipolar
NH4_mean_cat_4	0.0609144	-0.425058	0.546887	1.06281	0.653732	1.72787	0.24795	0.245673	0.805936	3	bipolar
NH4_mean_cat_5	0.140127	-0.377619	0.657873	1.15042	0.685492	1.93068	0.264161	0.530461	0.595792	3	bipolar
NH4_mean_cat_6	0.230242	-0.316541	0.777026	1.2589	0.728665	2.17499	0.278976	0.825311	0.409195	3	bipolar
NH4_mean_cat_7	0.254848	-0.319451	0.829148	1.29027	0.726548	2.29137	0.293015	0.869744	0.38444	3	bipolar
NO2_mean_cat_2	-0.0408505	-0.418201	0.3365	0.959973	0.65823	1.40004	0.192529	-0.212178	0.831968	3	bipolar
NO2_mean_cat_3	0.0960159	-0.346764	0.538796	1.10078	0.706972	1.71394	0.225912	0.425014	0.670826	3	bipolar
NO2_mean_cat_4	0.122762	-0.365474	0.610997	1.13061	0.693868	1.84227	0.249104	0.492812	0.622146	3	bipolar
NO2_mean_cat_5	-0.0633643	-0.594424	0.467695	0.938601	0.55188	1.59631	0.270954	-0.233857	0.815096	3	bipolar
NO2_mean_cat_6	-0.203893	-0.77887	0.371085	0.81555	0.458924	1.44931	0.293361	-0.695023	0.487041	3	bipolar
NO2_mean_cat_7	-0.472389	-1.08608	0.141305	0.623511	0.337536	1.15178	0.313115	-1.50868	0.131382	3	bipolar
NO3_mean_cat_2	0.301602	0.0894767	0.513727	1.35202	1.0936	1.67151	0.108229	2.7867	0.00532479	3	bipolar
NO3_mean_cat_3	0.471368	0.234397	0.708338	1.60218	1.26415	2.03061	0.120906	3.89864	9.67344e-05	3	bipolar
NO3_mean_cat_4	0.482235	0.221778	0.742692	1.61969	1.24829	2.10159	0.132889	3.62886	0.000284672	3	bipolar
NO3_mean_cat_5	0.401882	0.115812	0.687951	1.49463	1.12278	1.98963	0.145956	2.75343	0.00589735	3	bipolar
NO3_mean_cat_6	0.233417	-0.0808509	0.547686	1.26291	0.922331	1.72925	0.160344	1.45573	0.145467	3	bipolar
NO3_mean_cat_7	-0.0468675	-0.395551	0.301816	0.954214	0.673309	1.35231	0.177903	-0.263444	0.792208	3	bipolar
NOX_mean_cat_2	-0.0173579	-0.388258	0.353543	0.982792	0.678237	1.4241	0.189238	-0.0917249	0.926917	3	bipolar
NOX_mean_cat_3	0.0493009	-0.374709	0.473311	1.05054	0.687489	1.6053	0.216336	0.227891	0.819731	3	bipolar
NOX_mean_cat_4	-0.0209222	-0.481791	0.439947	0.979295	0.617676	1.55262	0.235142	-0.0889769	0.9291	3	bipolar
NOX_mean_cat_5	0.145238	-0.347642	0.638118	1.15631	0.706352	1.89291	0.251474	0.577546	0.563571	3	bipolar
NOX_mean_cat_6	0.0834296	-0.439425	0.606285	1.08701	0.644407	1.83361	0.266768	0.312743	0.754476	3	bipolar
NOX_mean_cat_7	0.102024	-0.438547	0.642596	1.10741	0.644973	1.90141	0.275807	0.369913	0.711447	3	bipolar
O3_mean_cat_2	-0.162173	-0.327456	0.00311094	0.850294	0.720755	1.00312	0.0843299	-1.92307	0.0544708	3	bipolar
O3_mean_cat_3	-0.336956	-0.568619	-0.105294	0.71394	0.566307	0.90006	0.118197	-2.8508	0.00436094	3	bipolar
O3_mean_cat_4	-0.433761	-0.708963	-0.158559	0.648067	0.492155	0.853373	0.140412	-3.08921	0.00200693	3	bipolar
O3_mean_cat_5	-0.416096	-0.726189	-0.106002	0.659617	0.483749	0.899423	0.158214	-2.62996	0.00853957	3	bipolar
O3_mean_cat_6	-0.346216	-0.691396	-0.00103648	0.70736	0.500876	0.998964	0.176115	-1.96585	0.049316	3	bipolar
O3_mean_cat_7	-0.278792	-0.670049	0.112465	0.756697	0.511683	1.11903	0.199625	-1.39658	0.162539	3	bipolar
OC_mean_cat_2	0.213545	0.0581109	0.368979	1.23806	1.05983	1.44626	0.0793045	2.69272	0.00708716	3	bipolar
OC_mean_cat_3	0.141532	-0.0620553	0.345119	1.15204	0.939831	1.41216	0.103873	1.36255	0.173025	3	bipolar
OC_mean_cat_4	0.164505	-0.0818485	0.410859	1.17881	0.921412	1.50811	0.125693	1.30879	0.190607	3	bipolar
OC_mean_cat_5	0.074924	-0.227826	0.377674	1.0778	0.796263	1.45889	0.154467	0.485049	0.627642	3	bipolar
OC_mean_cat_6	0.273692	-0.0980299	0.645415	1.31481	0.906622	1.90678	0.189658	1.44309	0.148996	3	bipolar
OC_mean_cat_7	0.501152	0.0324125	0.969891	1.65062	1.03294	2.63766	0.239157	2.09549	0.0361273	3	bipolar
PM10_mean_cat_2	-0.0320033	-0.314808	0.250802	0.968503	0.729929	1.28506	0.144291	-0.221797	0.824472	3	bipolar
PM10_mean_cat_3	-0.111925	-0.452127	0.228276	0.894111	0.636273	1.25643	0.173575	-0.644822	0.519042	3	bipolar
PM10_mean_cat_4	-0.0316156	-0.414791	0.351559	0.968879	0.660479	1.42128	0.195501	-0.161716	0.87153	3	bipolar
PM10_mean_cat_5	-0.129946	-0.553525	0.293632	0.878143	0.57492	1.34129	0.216115	-0.601282	0.547652	3	bipolar
PM10_mean_cat_6	-0.231639	-0.694388	0.231111	0.793233	0.49938	1.26	0.236101	-0.981099	0.326544	3	bipolar
PM10_mean_cat_7	-0.0927897	-0.597894	0.412314	0.911385	0.549969	1.51031	0.257711	-0.360054	0.718807	3	bipolar
PM25_mean_cat_2	-0.15087	-0.44683	0.14509	0.859959	0.639653	1.15614	0.151003	-0.999122	0.317736	3	bipolar
PM25_mean_cat_3	-0.263079	-0.652549	0.126391	0.768681	0.520717	1.13473	0.198713	-1.32391	0.185532	3	bipolar
PM25_mean_cat_4	-0.398433	-0.854745	0.0578782	0.671371	0.425392	1.05959	0.232816	-1.71136	0.087014	3	bipolar
PM25_mean_cat_5	-0.517486	-1.01949	-0.0154816	0.596017	0.360779	0.984638	0.256129	-2.02041	0.043341	3	bipolar
PM25_mean_cat_6	-0.46627	-1.00574	0.0732011	0.627338	0.365774	1.07595	0.275245	-1.69402	0.0902624	3	bipolar
PM25_mean_cat_7	-0.378254	-0.962841	0.206332	0.685056	0.381806	1.22916	0.298264	-1.26819	0.204731	3	bipolar
SEASALT_mean_cat_2	0.0524236	-0.085119	0.189966	1.05382	0.918403	1.20921	0.0701761	0.74703	0.455046	3	bipolar
SEASALT_mean_cat_3	0.412413	0.257203	0.567622	1.51046	1.29331	1.76407	0.07919	5.20789	1.91004e-07	3	bipolar
SEASALT_mean_cat_4	0.702819	0.539499	0.86614	2.01944	1.71515	2.37771	0.0833282	8.43435	3.33049e-17	3	bipolar
SEASALT_mean_cat_5	0.680794	0.506264	0.855323	1.97544	1.65908	2.35213	0.0890471	7.64532	2.08427e-14	3	bipolar
SEASALT_mean_cat_6	0.706693	0.522719	0.890666	2.02728	1.68661	2.43675	0.0938657	7.52877	5.12221e-14	3	bipolar
SEASALT_mean_cat_7	0.929002	0.724088	1.13392	2.53198	2.06285	3.1078	0.10455	8.88574	6.34947e-19	3	bipolar
sia_mean_cat_2	-0.279229	-0.716497	0.158039	0.756367	0.48846	1.17121	0.2231	-1.25159	0.210721	3	bipolar
sia_mean_cat_3	-0.212172	-0.747987	0.323644	0.808826	0.473318	1.38216	0.27338	-0.776104	0.437687	3	bipolar
sia_mean_cat_4	-0.307196	-0.8974	0.283007	0.735506	0.407628	1.32711	0.30113	-1.02015	0.307659	3	bipolar
sia_mean_cat_5	-0.203142	-0.836408	0.430123	0.816162	0.433264	1.53745	0.323101	-0.628728	0.529527	3	bipolar
sia_mean_cat_6	-0.119943	-0.788575	0.54869	0.886971	0.454492	1.73098	0.341145	-0.351588	0.725147	3	bipolar
sia_mean_cat_7	-0.156599	-0.862118	0.548919	0.855047	0.422267	1.73138	0.359965	-0.43504	0.663533	3	bipolar
SO2_mean_cat_2	0.179998	-0.118888	0.478885	1.19722	0.887907	1.61427	0.152496	1.18035	0.237862	3	bipolar
SO2_mean_cat_3	0.0993417	-0.269023	0.467706	1.10444	0.764126	1.59633	0.187945	0.528569	0.597104	3	bipolar
SO2_mean_cat_4	-0.0647577	-0.486389	0.356874	0.937295	0.614843	1.42886	0.215122	-0.301028	0.763393	3	bipolar
SO2_mean_cat_5	-0.159781	-0.622646	0.303084	0.85233	0.536523	1.35403	0.23616	-0.676579	0.498673	3	bipolar
SO2_mean_cat_6	-0.307762	-0.80533	0.189805	0.73509	0.446941	1.20901	0.253865	-1.21231	0.225395	3	bipolar
SO2_mean_cat_7	-0.292839	-0.828666	0.242988	0.746142	0.436631	1.27505	0.273386	-1.07116	0.2841	3	bipolar
SO4_mean_cat_2	-0.0528806	-0.54211	0.436349	0.948493	0.58152	1.54705	0.249612	-0.211851	0.832223	3	bipolar
SO4_mean_cat_3	-0.115836	-0.732198	0.500526	0.890621	0.480851	1.64959	0.314476	-0.368347	0.712615	3	bipolar
SO4_mean_cat_4	0.0330898	-0.642397	0.708577	1.03364	0.52603	2.0311	0.344642	0.096012	0.923511	3	bipolar
SO4_mean_cat_5	0.134945	-0.581032	0.850923	1.14447	0.559321	2.34181	0.365301	0.369409	0.711823	3	bipolar
SO4_mean_cat_6	0.250242	-0.495885	0.996369	1.28434	0.609031	2.70843	0.380684	0.657347	0.510958	3	bipolar
SO4_mean_cat_7	0.275906	-0.498387	1.0502	1.31772	0.60751	2.85822	0.395054	0.698399	0.484928	3	bipolar
CO_mean_cat_2	0.28768	0.0649761	0.510383	1.33333	1.06713	1.66593	0.113626	2.5318	0.0113477	4	bipolar
CO_mean_cat_3	0.349072	0.0812915	0.616853	1.41775	1.08469	1.85309	0.136625	2.55496	0.01062	4	bipolar
CO_mean_cat_4	0.516074	0.211943	0.820206	1.67544	1.23608	2.27097	0.155172	3.32582	0.00088158	4	bipolar
CO_mean_cat_5	0.655744	0.321363	0.990125	1.92658	1.37901	2.69157	0.170606	3.84363	0.00012123	4	bipolar
CO_mean_cat_6	0.834936	0.463648	1.20622	2.30467	1.58986	3.34084	0.189436	4.40749	1.04577e-05	4	bipolar
CO_mean_cat_7	0.889172	0.467385	1.31096	2.43311	1.59582	3.70973	0.215201	4.13181	3.59916e-05	4	bipolar
EC_mean_cat_2	0.249334	0.0673468	0.43132	1.28317	1.06967	1.53929	0.0928521	2.68528	0.00724698	4	bipolar
EC_mean_cat_3	0.20178	-0.0379979	0.441558	1.22358	0.962715	1.55513	0.122338	1.64937	0.0990726	4	bipolar
EC_mean_cat_4	0.251773	-0.0387025	0.542249	1.2863	0.962037	1.71987	0.148205	1.69882	0.0893528	4	bipolar
EC_mean_cat_5	0.109003	-0.238739	0.456744	1.11517	0.787621	1.57892	0.177422	0.614369	0.538972	4	bipolar
EC_mean_cat_6	0.158524	-0.260491	0.577538	1.17178	0.770673	1.78165	0.213787	0.741503	0.458388	4	bipolar
EC_mean_cat_7	0.101835	-0.413339	0.617009	1.1072	0.661438	1.85338	0.262849	0.387428	0.698439	4	bipolar
NH4_mean_cat_2	0.154744	-0.227047	0.536535	1.16736	0.796883	1.71007	0.194795	0.794395	0.426965	4	bipolar
NH4_mean_cat_3	-0.0468556	-0.496822	0.403111	0.954225	0.608461	1.49647	0.229579	-0.204094	0.83828	4	bipolar
NH4_mean_cat_4	-0.0205183	-0.509071	0.468034	0.979691	0.601054	1.59685	0.249266	-0.0823147	0.934396	4	bipolar
NH4_mean_cat_5	0.0319515	-0.489071	0.552974	1.03247	0.613196	1.73841	0.265833	0.120194	0.90433	4	bipolar
NH4_mean_cat_6	0.0965007	-0.45431	0.647311	1.10131	0.634886	1.9104	0.281031	0.343381	0.731312	4	bipolar
NH4_mean_cat_7	0.109053	-0.469963	0.68807	1.11522	0.625025	1.98987	0.295422	0.369143	0.712021	4	bipolar
NO2_mean_cat_2	-0.0377204	-0.41638	0.340939	0.962982	0.659429	1.40627	0.193197	-0.195243	0.845203	4	bipolar
NO2_mean_cat_3	0.0790889	-0.365142	0.52332	1.0823	0.694098	1.68762	0.226653	0.348943	0.727132	4	bipolar
NO2_mean_cat_4	0.0860765	-0.403479	0.575631	1.08989	0.667992	1.77825	0.249778	0.344613	0.730386	4	bipolar
NO2_mean_cat_5	-0.121377	-0.653857	0.411103	0.8857	0.520036	1.50848	0.271678	-0.446768	0.655043	4	bipolar
NO2_mean_cat_6	-0.266925	-0.8437	0.309849	0.76573	0.430116	1.36322	0.294278	-0.907051	0.36438	4	bipolar
NO2_mean_cat_7	-0.505219	-1.12097	0.110531	0.603374	0.325964	1.11687	0.314164	-1.60814	0.107805	4	bipolar
NO3_mean_cat_2	0.316677	0.103552	0.529803	1.37256	1.1091	1.6986	0.10874	2.91225	0.00358831	4	bipolar
NO3_mean_cat_3	0.484576	0.245575	0.723578	1.62349	1.27836	2.0618	0.121942	3.97383	7.0726e-05	4	bipolar
NO3_mean_cat_4	0.502649	0.239649	0.765648	1.65309	1.2708	2.15039	0.134186	3.74591	0.000179738	4	bipolar
NO3_mean_cat_5	0.423036	0.133961	0.712111	1.52659	1.14335	2.03829	0.14749	2.86823	0.00412772	4	bipolar
NO3_mean_cat_6	0.248811	-0.068778	0.566399	1.2825	0.933534	1.76191	0.162038	1.53551	0.124659	4	bipolar
NO3_mean_cat_7	-0.0439028	-0.396307	0.308501	0.957047	0.6728	1.36138	0.179801	-0.244174	0.807096	4	bipolar
NOX_mean_cat_2	-0.031755	-0.4039	0.34039	0.968744	0.667711	1.4055	0.189873	-0.167243	0.867179	4	bipolar
NOX_mean_cat_3	0.0325881	-0.392847	0.458023	1.03312	0.675132	1.58095	0.217063	0.150132	0.88066	4	bipolar
NOX_mean_cat_4	-0.0373752	-0.499926	0.425176	0.963315	0.606575	1.52986	0.236	-0.15837	0.874166	4	bipolar
NOX_mean_cat_5	0.126078	-0.369467	0.621624	1.13437	0.691102	1.86195	0.252834	0.498661	0.618018	4	bipolar
NOX_mean_cat_6	0.0509918	-0.475983	0.577967	1.05231	0.621274	1.78241	0.26887	0.189653	0.849581	4	bipolar
NOX_mean_cat_7	0.10047	-0.445023	0.645962	1.10569	0.64081	1.90782	0.278317	0.360989	0.718107	4	bipolar
O3_mean_cat_2	-0.120024	-0.286452	0.0464032	0.886899	0.750923	1.0475	0.0849135	-1.41349	0.157512	4	bipolar
O3_mean_cat_3	-0.277145	-0.510956	-0.0433336	0.757945	0.599922	0.957592	0.119294	-2.32322	0.0201676	4	bipolar
O3_mean_cat_4	-0.382125	-0.659535	-0.104715	0.68241	0.517092	0.900581	0.141538	-2.6998	0.00693806	4	bipolar
O3_mean_cat_5	-0.387416	-0.699209	-0.0756236	0.678808	0.496978	0.927165	0.159081	-2.43534	0.0148777	4	bipolar
O3_mean_cat_6	-0.332988	-0.679578	0.0136015	0.716779	0.506831	1.01369	0.176835	-1.88305	0.0596939	4	bipolar
O3_mean_cat_7	-0.271684	-0.664039	0.12067	0.762095	0.514768	1.12825	0.200185	-1.35717	0.174728	4	bipolar
OC_mean_cat_2	0.225138	0.069439	0.380838	1.2525	1.07191	1.46351	0.0794399	2.83407	0.0045959	4	bipolar
OC_mean_cat_3	0.161	-0.0431912	0.36519	1.17468	0.957728	1.44079	0.104181	1.54538	0.122253	4	bipolar
OC_mean_cat_4	0.195575	-0.0514858	0.442636	1.21601	0.949817	1.55681	0.126054	1.55152	0.120777	4	bipolar
OC_mean_cat_5	0.125116	-0.178746	0.428978	1.13328	0.836319	1.53569	0.155034	0.807022	0.419654	4	bipolar
OC_mean_cat_6	0.346557	-0.0283545	0.721469	1.41419	0.972044	2.05745	0.191285	1.81173	0.0700276	4	bipolar
OC_mean_cat_7	0.577809	0.102372	1.05325	1.78213	1.1078	2.86694	0.242574	2.38199	0.0172195	4	bipolar
PM10_mean_cat_2	-0.0339819	-0.317139	0.249175	0.966589	0.72823	1.28297	0.14447	-0.235217	0.81404	4	bipolar
PM10_mean_cat_3	-0.118454	-0.45955	0.222642	0.888293	0.631568	1.24937	0.174032	-0.680647	0.496095	4	bipolar
PM10_mean_cat_4	-0.0378334	-0.422558	0.346891	0.962873	0.655368	1.41466	0.196291	-0.192741	0.847162	4	bipolar
PM10_mean_cat_5	-0.12979	-0.555468	0.295888	0.87828	0.573804	1.34432	0.217187	-0.597597	0.550109	4	bipolar
PM10_mean_cat_6	-0.22466	-0.690052	0.240731	0.798787	0.50155	1.27218	0.237449	-0.946142	0.344076	4	bipolar
PM10_mean_cat_7	-0.0764908	-0.584723	0.431742	0.926361	0.55726	1.53994	0.259307	-0.294982	0.768008	4	bipolar
PM25_mean_cat_2	-0.124454	-0.420689	0.171782	0.882979	0.656594	1.18742	0.151143	-0.823415	0.410272	4	bipolar
PM25_mean_cat_3	-0.208628	-0.599044	0.181788	0.811697	0.549337	1.19936	0.199195	-1.04735	0.294937	4	bipolar
PM25_mean_cat_4	-0.32138	-0.779083	0.136324	0.725148	0.458827	1.14605	0.233526	-1.3762	0.168759	4	bipolar
PM25_mean_cat_5	-0.415822	-0.919903	0.0882598	0.659798	0.398558	1.09227	0.257189	-1.61679	0.105923	4	bipolar
PM25_mean_cat_6	-0.345435	-0.887687	0.196816	0.707912	0.411607	1.21752	0.276664	-1.24857	0.211821	4	bipolar
PM25_mean_cat_7	-0.240069	-0.828333	0.348195	0.786574	0.436777	1.41651	0.30014	-0.799857	0.423794	4	bipolar
SEASALT_mean_cat_2	0.000865954	-0.141561	0.143293	1.00087	0.868002	1.15407	0.0726683	0.0119165	0.990492	4	bipolar
SEASALT_mean_cat_3	0.297628	0.13083	0.464426	1.34666	1.13977	1.5911	0.0851025	3.49729	0.000470015	4	bipolar
SEASALT_mean_cat_4	0.53925	0.356613	0.721887	1.71472	1.42848	2.05831	0.0931838	5.78695	7.16739e-09	4	bipolar
SEASALT_mean_cat_5	0.536592	0.346278	0.726907	1.71017	1.4138	2.06867	0.0971012	5.52612	3.27397e-08	4	bipolar
SEASALT_mean_cat_6	0.556929	0.356271	0.757587	1.7453	1.42799	2.13312	0.102378	5.43991	5.33062e-08	4	bipolar
SEASALT_mean_cat_7	0.783836	0.563661	1.00401	2.18986	1.75709	2.72921	0.112336	6.97759	3.00296e-12	4	bipolar
sia_mean_cat_2	-0.274717	-0.711601	0.162167	0.759787	0.490858	1.17606	0.222904	-1.23244	0.217783	4	bipolar
sia_mean_cat_3	-0.209034	-0.744894	0.326826	0.811368	0.474785	1.38656	0.273403	-0.764564	0.444531	4	bipolar
sia_mean_cat_4	-0.309874	-0.900146	0.280397	0.733539	0.40651	1.32366	0.301165	-1.02892	0.303517	4	bipolar
sia_mean_cat_5	-0.205904	-0.83927	0.427462	0.813911	0.432026	1.53336	0.323152	-0.637175	0.524011	4	bipolar
sia_mean_cat_6	-0.118928	-0.787807	0.549952	0.887872	0.454841	1.73317	0.341271	-0.348484	0.727476	4	bipolar
sia_mean_cat_7	-0.158361	-0.864367	0.547645	0.853542	0.421318	1.72918	0.360214	-0.43963	0.660205	4	bipolar
SO2_mean_cat_2	0.163178	-0.135572	0.461927	1.17725	0.873217	1.58713	0.152426	1.07054	0.284377	4	bipolar
SO2_mean_cat_3	0.0736313	-0.295265	0.442528	1.07641	0.744334	1.55664	0.188216	0.391206	0.695645	4	bipolar
SO2_mean_cat_4	-0.104862	-0.527589	0.317866	0.900449	0.590026	1.37419	0.215681	-0.486188	0.626834	4	bipolar
SO2_mean_cat_5	-0.199822	-0.664262	0.264618	0.818876	0.514653	1.30293	0.236964	-0.843262	0.399082	4	bipolar
SO2_mean_cat_6	-0.339084	-0.838453	0.160285	0.712423	0.432379	1.17385	0.254785	-1.33087	0.183233	4	bipolar
SO2_mean_cat_7	-0.320228	-0.858094	0.217638	0.725984	0.42397	1.24314	0.274426	-1.1669	0.243252	4	bipolar
SO4_mean_cat_2	-0.0365599	-0.524588	0.451468	0.9641	0.591799	1.57062	0.248998	-0.146828	0.883268	4	bipolar
SO4_mean_cat_3	-0.102516	-0.718267	0.513235	0.902563	0.487596	1.67069	0.314164	-0.326314	0.744187	4	bipolar
SO4_mean_cat_4	0.0563005	-0.618627	0.731228	1.05792	0.538684	2.07763	0.344357	0.163494	0.870129	4	bipolar
SO4_mean_cat_5	0.165293	-0.550327	0.880913	1.17974	0.576761	2.4131	0.365119	0.452709	0.650758	4	bipolar
SO4_mean_cat_6	0.284641	-0.461159	1.03044	1.32928	0.630553	2.8023	0.380517	0.748038	0.454437	4	bipolar
SO4_mean_cat_7	0.315667	-0.458285	1.08962	1.37117	0.632367	2.97314	0.394881	0.799397	0.42406	4	bipolar
CO_mean_cat_2	0.0477314	-0.0125185	0.107981	1.04889	0.98756	1.11403	0.0307403	1.55273	0.120488	0	depression
CO_mean_cat_3	0.0895547	0.0154281	0.163681	1.09369	1.01555	1.17784	0.0378204	2.36789	0.0178896	0	depression
CO_mean_cat_4	0.103288	0.0175165	0.18906	1.10881	1.01767	1.20811	0.0437618	2.36023	0.0182634	0	depression
CO_mean_cat_5	0.131743	0.0365292	0.226956	1.14081	1.0372	1.25477	0.0485791	2.71192	0.00668956	0	depression
CO_mean_cat_6	0.156541	0.0490754	0.264006	1.16946	1.0503	1.30214	0.0548302	2.85501	0.00430358	0	depression
CO_mean_cat_7	0.140704	0.0163894	0.265019	1.15108	1.01652	1.30346	0.063427	2.21836	0.0265301	0	depression
EC_mean_cat_2	0.100276	0.0455059	0.155045	1.10548	1.04656	1.16771	0.0279442	3.58842	0.000332686	0	depression
EC_mean_cat_3	0.143691	0.0713444	0.216038	1.15453	1.07395	1.24115	0.0369123	3.89277	9.91053e-05	0	depression
EC_mean_cat_4	0.14041	0.051867	0.228954	1.15075	1.05324	1.25728	0.045176	3.10807	0.00188311	0	depression
EC_mean_cat_5	0.153746	0.0466506	0.260842	1.1662	1.04776	1.29802	0.0546417	2.81372	0.0048972	0	depression
EC_mean_cat_6	0.231706	0.103708	0.359705	1.26075	1.10928	1.43291	0.0653065	3.54798	0.000388193	0	depression
EC_mean_cat_7	0.204212	0.0498991	0.358525	1.22656	1.05116	1.43122	0.0787325	2.59374	0.00949372	0	depression
NH4_mean_cat_2	-0.277175	-0.359955	-0.194395	0.757922	0.697708	0.823333	0.0422354	-6.56261	5.28734e-11	0	depression
NH4_mean_cat_3	-0.40957	-0.513782	-0.305357	0.663936	0.598229	0.73686	0.0531708	-7.70291	1.33003e-14	0	depression
NH4_mean_cat_4	-0.437028	-0.554695	-0.319361	0.645954	0.574248	0.726614	0.0600353	-7.27951	3.35044e-13	0	depression
NH4_mean_cat_5	-0.460827	-0.589794	-0.33186	0.630762	0.554441	0.717587	0.0658007	-7.00338	2.4986e-12	0	depression
NH4_mean_cat_6	-0.468647	-0.608058	-0.329236	0.625848	0.544407	0.719473	0.0711295	-6.58865	4.43849e-11	0	depression
NH4_mean_cat_7	-0.435195	-0.584895	-0.285494	0.647139	0.557164	0.751643	0.0763791	-5.69782	1.21348e-08	0	depression
NO2_mean_cat_2	0.135592	0.020697	0.250488	1.14521	1.02091	1.28465	0.0586211	2.31303	0.0207211	0	depression
NO2_mean_cat_3	0.219284	0.0828663	0.355701	1.24518	1.0864	1.42718	0.0696019	3.15054	0.00162969	0	depression
NO2_mean_cat_4	0.291017	0.139663	0.442371	1.33779	1.14989	1.55639	0.0772229	3.76853	0.000164213	0	depression
NO2_mean_cat_5	0.384808	0.21948	0.550135	1.46933	1.24543	1.73349	0.0843522	4.56192	5.0689e-06	0	depression
NO2_mean_cat_6	0.370079	0.191409	0.548749	1.44785	1.21095	1.73109	0.0911599	4.05967	4.91418e-05	0	depression
NO2_mean_cat_7	0.256721	0.0649005	0.448542	1.29268	1.06705	1.56603	0.0978696	2.6231	0.00871344	0	depression
NO3_mean_cat_2	0.281725	0.224049	0.3394	1.32541	1.25113	1.4041	0.0294267	9.57377	1.03074e-21	0	depression
NO3_mean_cat_3	0.500018	0.436037	0.563999	1.64875	1.54657	1.75769	0.032644	15.3173	5.86121e-53	0	depression
NO3_mean_cat_4	0.609352	0.540633	0.67807	1.83924	1.71709	1.97007	0.0350611	17.3797	1.17548e-67	0	depression
NO3_mean_cat_5	0.675128	0.601472	0.748784	1.96428	1.8248	2.11443	0.0375801	17.965	3.65984e-72	0	depression
NO3_mean_cat_6	0.704383	0.625739	0.783028	2.0226	1.86963	2.18809	0.0401253	17.5546	5.48466e-69	0	depression
NO3_mean_cat_7	0.684832	0.599937	0.769728	1.98344	1.822	2.15918	0.0433148	15.8106	2.63028e-56	0	depression
NOX_mean_cat_2	0.0370717	-0.0757139	0.149857	1.03777	0.927081	1.16167	0.0575447	0.644225	0.51943	0	depression
NOX_mean_cat_3	0.0837807	-0.0464723	0.214034	1.08739	0.954591	1.23866	0.0664569	1.26068	0.207425	0	depression
NOX_mean_cat_4	0.0742052	-0.0685643	0.216975	1.07703	0.933733	1.24231	0.072843	1.0187	0.308345	0	depression
NOX_mean_cat_5	0.0974711	-0.0563902	0.251332	1.10238	0.94517	1.28574	0.0785021	1.24164	0.214371	0	depression
NOX_mean_cat_6	0.0901586	-0.0726598	0.252977	1.09435	0.929917	1.28785	0.0830721	1.0853	0.277787	0	depression
NOX_mean_cat_7	0.0673865	-0.10142	0.236193	1.06971	0.903554	1.26642	0.0861272	0.782406	0.433976	0	depression
O3_mean_cat_2	-0.14618	-0.203101	-0.0892579	0.864003	0.816196	0.91461	0.0290422	-5.03335	4.81983e-07	0	depression
O3_mean_cat_3	-0.163579	-0.240566	-0.0865915	0.8491	0.786183	0.917052	0.0392799	-4.16444	3.12123e-05	0	depression
O3_mean_cat_4	-0.129873	-0.220765	-0.0389805	0.878207	0.801905	0.961769	0.0463745	-2.80052	0.00510199	0	depression
O3_mean_cat_5	-0.128144	-0.230082	-0.0262051	0.879727	0.794468	0.974135	0.0520104	-2.46381	0.013747	0	depression
O3_mean_cat_6	-0.059534	-0.172033	0.0529647	0.942204	0.841952	1.05439	0.0573984	-1.03721	0.299639	0	depression
O3_mean_cat_7	0.038839	-0.0869067	0.164585	1.0396	0.916763	1.1789	0.0641571	0.605372	0.544932	0	depression
OC_mean_cat_2	0.11416	0.0650985	0.163221	1.12093	1.06726	1.1773	0.0250317	4.56061	5.10058e-06	0	depression
OC_mean_cat_3	0.108176	0.0450505	0.171302	1.11424	1.04608	1.18685	0.0322076	3.35872	0.000783048	0	depression
OC_mean_cat_4	0.0538145	-0.0230181	0.130647	1.05529	0.977245	1.13957	0.039201	1.37278	0.16982	0	depression
OC_mean_cat_5	0.0590941	-0.0355108	0.153699	1.06088	0.965112	1.16614	0.0482687	1.22427	0.220849	0	depression
OC_mean_cat_6	0.0223122	-0.0927599	0.137384	1.02256	0.911412	1.14727	0.0587113	0.380033	0.703921	0	depression
OC_mean_cat_7	0.101295	-0.0396667	0.242256	1.1066	0.96111	1.27412	0.0719203	1.40843	0.159004	0	depression
PM10_mean_cat_2	-0.207836	-0.27275	-0.142922	0.81234	0.761283	0.866822	0.0331202	-6.27521	3.49159e-10	0	depression
PM10_mean_cat_3	-0.275313	-0.35846	-0.192166	0.759334	0.698752	0.82517	0.0424227	-6.48975	8.59792e-11	0	depression
PM10_mean_cat_4	-0.300492	-0.39842	-0.202563	0.740454	0.67138	0.816635	0.0499644	-6.01411	1.80875e-09	0	depression
PM10_mean_cat_5	-0.330895	-0.443371	-0.218418	0.718281	0.641869	0.803789	0.0573871	-5.76601	8.11688e-09	0	depression
PM10_mean_cat_6	-0.37203	-0.499074	-0.244986	0.689334	0.607093	0.782716	0.0648196	-5.73946	9.49777e-09	0	depression
PM10_mean_cat_7	-0.336281	-0.478042	-0.194519	0.714423	0.619996	0.82323	0.0723285	-4.64935	3.32985e-06	0	depression
PM25_mean_cat_2	0.0678325	-0.00425748	0.139923	1.07019	0.995752	1.15018	0.0367813	1.84421	0.0651521	0	depression
PM25_mean_cat_3	0.00995281	-0.0875159	0.107422	1.01	0.916204	1.1134	0.0497299	0.200138	0.841373	0	depression
PM25_mean_cat_4	0.0114818	-0.106595	0.129559	1.01155	0.89889	1.13833	0.0602444	0.190586	0.84885	0	depression
PM25_mean_cat_5	0.0312516	-0.103972	0.166475	1.03175	0.901251	1.18113	0.0689927	0.452969	0.650571	0	depression
PM25_mean_cat_6	0.0419986	-0.108945	0.192942	1.04289	0.89678	1.21281	0.0770134	0.545341	0.585519	0	depression
PM25_mean_cat_7	0.0787415	-0.0894687	0.246952	1.08192	0.914417	1.28012	0.0858231	0.917486	0.358888	0	depression
SEASALT_mean_cat_2	-0.0344075	-0.0731374	0.00432251	0.966178	0.929473	1.00433	0.0197606	-1.74122	0.0816451	0	depression
SEASALT_mean_cat_3	-0.0725318	-0.117801	-0.0272622	0.930036	0.888873	0.973106	0.0230971	-3.14029	0.00168779	0	depression
SEASALT_mean_cat_4	-0.031132	-0.0793667	0.0171026	0.969348	0.923701	1.01725	0.02461	-1.26502	0.205865	0	depression
SEASALT_mean_cat_5	-0.0176568	-0.0689001	0.0335866	0.982498	0.93342	1.03416	0.026145	-0.67534	0.49946	0	depression
SEASALT_mean_cat_6	0.0146084	-0.039986	0.0692027	1.01472	0.960803	1.07165	0.0278548	0.524448	0.599967	0	depression
SEASALT_mean_cat_7	0.256458	0.195148	0.317769	1.29234	1.21549	1.37406	0.0312815	8.19841	2.43594e-16	0	depression
sia_mean_cat_2	-0.113063	-0.211047	-0.0150786	0.893094	0.809736	0.985035	0.0499929	-2.26158	0.0237234	0	depression
sia_mean_cat_3	-0.183015	-0.310822	-0.0552078	0.832756	0.732844	0.946288	0.065209	-2.80659	0.00500685	0	depression
sia_mean_cat_4	-0.333811	-0.479938	-0.187684	0.716189	0.618822	0.828876	0.0745557	-4.47734	7.55805e-06	0	depression
sia_mean_cat_5	-0.447286	-0.608535	-0.286038	0.639361	0.544148	0.751234	0.082271	-5.43675	5.42619e-08	0	depression
sia_mean_cat_6	-0.499623	-0.674081	-0.325165	0.606759	0.509624	0.722408	0.0890109	-5.61305	1.98787e-08	0	depression
sia_mean_cat_7	-0.577548	-0.765826	-0.38927	0.561273	0.46495	0.677552	0.096062	-6.01224	1.8298e-09	0	depression
SO2_mean_cat_2	0.131344	0.0607892	0.201899	1.14036	1.06267	1.22372	0.035998	3.64865	0.000263626	0	depression
SO2_mean_cat_3	0.0833687	-0.007123	0.17386	1.08694	0.992902	1.18989	0.0461701	1.80569	0.0709673	0	depression
SO2_mean_cat_4	-0.0425843	-0.15019	0.0650218	0.95831	0.860544	1.06718	0.0549021	-0.775642	0.437961	0	depression
SO2_mean_cat_5	-0.17419	-0.295943	-0.0524379	0.840137	0.74383	0.948913	0.0621197	-2.80411	0.00504562	0	depression
SO2_mean_cat_6	-0.268998	-0.403191	-0.134805	0.764145	0.668184	0.873886	0.068467	-3.92887	8.5346e-05	0	depression
SO2_mean_cat_7	-0.342119	-0.489768	-0.19447	0.710264	0.612769	0.823271	0.0753324	-4.54146	5.58663e-06	0	depression
SO4_mean_cat_2	-0.175429	-0.255888	-0.0949689	0.839097	0.774229	0.909401	0.0410516	-4.27337	1.92541e-05	0	depression
SO4_mean_cat_3	-0.373894	-0.481436	-0.266352	0.68805	0.617896	0.766169	0.0548693	-6.81427	9.47431e-12	0	depression
SO4_mean_cat_4	-0.298281	-0.424495	-0.172068	0.742093	0.6541	0.841922	0.0643959	-4.63199	3.62166e-06	0	depression
SO4_mean_cat_5	-0.297088	-0.439829	-0.154347	0.742979	0.644147	0.856974	0.0728283	-4.07929	4.51727e-05	0	depression
SO4_mean_cat_6	-0.411622	-0.57004	-0.253204	0.662575	0.565503	0.77631	0.0808271	-5.09262	3.53151e-07	0	depression
SO4_mean_cat_7	-0.622304	-0.794726	-0.449882	0.536706	0.451705	0.637703	0.087972	-7.07388	1.50656e-12	0	depression
CO_mean_cat_2	0.104951	0.044161	0.165741	1.11066	1.04515	1.18027	0.0310158	3.38379	0.000714932	1	depression
CO_mean_cat_3	0.178516	0.103425	0.253606	1.19544	1.10896	1.28866	0.0383122	4.6595	3.16976e-06	1	depression
CO_mean_cat_4	0.222966	0.135902	0.31003	1.24978	1.14557	1.36347	0.0444211	5.01938	5.18395e-07	1	depression
CO_mean_cat_5	0.296136	0.199105	0.393167	1.34465	1.22031	1.48167	0.0495068	5.98173	2.20783e-09	1	depression
CO_mean_cat_6	0.361023	0.251272	0.470773	1.4348	1.28566	1.60123	0.0559961	6.44728	1.13875e-10	1	depression
CO_mean_cat_7	0.376702	0.249689	0.503715	1.45747	1.28363	1.65486	0.0648039	5.81295	6.13819e-09	1	depression
EC_mean_cat_2	0.0720656	0.0170849	0.127046	1.07473	1.01723	1.13547	0.0280519	2.56901	0.010199	1	depression
EC_mean_cat_3	0.102038	0.0292538	0.174823	1.10743	1.02969	1.19104	0.0371357	2.74772	0.00600117	1	depression
EC_mean_cat_4	0.0884829	-0.000557665	0.177523	1.09252	0.999442	1.19426	0.0454297	1.94769	0.0514522	1	depression
EC_mean_cat_5	0.0954217	-0.0122157	0.203059	1.10012	0.987859	1.22515	0.0549181	1.73753	0.0822939	1	depression
EC_mean_cat_6	0.161781	0.0333619	0.2902	1.1756	1.03392	1.3367	0.0655212	2.46914	0.0135438	1	depression
EC_mean_cat_7	0.135183	-0.0194141	0.289781	1.14475	0.980773	1.33613	0.0788777	1.71383	0.0865591	1	depression
NH4_mean_cat_2	-0.190975	-0.274722	-0.107228	0.826153	0.759783	0.89832	0.0427287	-4.46948	7.84104e-06	1	depression
NH4_mean_cat_3	-0.264632	-0.370907	-0.158357	0.767488	0.690108	0.853545	0.054223	-4.88043	1.05852e-06	1	depression
NH4_mean_cat_4	-0.239716	-0.360549	-0.118883	0.786851	0.697294	0.887911	0.0616505	-3.88831	0.000100946	1	depression
NH4_mean_cat_5	-0.204934	-0.338321	-0.071548	0.814701	0.712967	0.930952	0.0680555	-3.01128	0.00260148	1	depression
NH4_mean_cat_6	-0.14227	-0.287515	0.00297528	0.867387	0.750125	1.00298	0.074106	-1.91981	0.0548813	1	depression
NH4_mean_cat_7	-0.0627413	-0.218922	0.0934395	0.939186	0.803384	1.09794	0.0796855	-0.787361	0.43107	1	depression
NO2_mean_cat_2	0.104368	-0.0101138	0.218851	1.11001	0.989937	1.24465	0.0584103	1.78681	0.0739677	1	depression
NO2_mean_cat_3	0.165416	0.0292507	0.30158	1.17988	1.02968	1.35199	0.0694731	2.381	0.0172657	1	depression
NO2_mean_cat_4	0.210355	0.0590312	0.361678	1.23412	1.06081	1.43574	0.0772073	2.72454	0.00643903	1	depression
NO2_mean_cat_5	0.275764	0.11029	0.441237	1.31754	1.1166	1.55463	0.0844268	3.2663	0.00108961	1	depression
NO2_mean_cat_6	0.233274	0.0542323	0.412316	1.26273	1.05573	1.51031	0.0913495	2.55364	0.0106602	1	depression
NO2_mean_cat_7	0.110819	-0.0814513	0.30309	1.11719	0.921778	1.35404	0.098099	1.12967	0.258616	1	depression
NO3_mean_cat_2	0.169357	0.109557	0.229157	1.18454	1.11578	1.25754	0.0305108	5.55072	2.84491e-08	1	depression
NO3_mean_cat_3	0.314121	0.245148	0.383093	1.36905	1.27781	1.46681	0.0351908	8.92622	4.40813e-19	1	depression
NO3_mean_cat_4	0.362517	0.285869	0.439165	1.43694	1.33092	1.55141	0.039107	9.26987	1.86365e-20	1	depression
NO3_mean_cat_5	0.368027	0.282976	0.453079	1.44488	1.32707	1.57315	0.0433944	8.48098	2.23305e-17	1	depression
NO3_mean_cat_6	0.309314	0.214942	0.403685	1.36249	1.23979	1.49733	0.0481497	6.42401	1.32732e-10	1	depression
NO3_mean_cat_7	0.163866	0.057181	0.270552	1.17806	1.05885	1.31069	0.0544323	3.01046	0.00260852	1	depression
NOX_mean_cat_2	0.0355207	-0.0768965	0.147938	1.03616	0.925986	1.15944	0.0573567	0.619294	0.535723	1	depression
NOX_mean_cat_3	0.0827165	-0.0472759	0.212709	1.08623	0.953824	1.23702	0.0663239	1.24716	0.212339	1	depression
NOX_mean_cat_4	0.0785415	-0.0640872	0.22117	1.08171	0.937923	1.24754	0.0727711	1.0793	0.280456	1	depression
NOX_mean_cat_5	0.11737	-0.0364015	0.271141	1.12454	0.964253	1.31146	0.0784561	1.49599	0.134656	1	depression
NOX_mean_cat_6	0.119206	-0.043565	0.281978	1.1266	0.95737	1.32575	0.0830481	1.43539	0.151176	1	depression
NOX_mean_cat_7	0.106023	-0.0627412	0.274788	1.11185	0.939187	1.31625	0.086106	1.23131	0.218206	1	depression
O3_mean_cat_2	-0.128045	-0.185042	-0.0710479	0.879814	0.83107	0.931417	0.0290806	-4.4031	1.06715e-05	1	depression
O3_mean_cat_3	-0.136746	-0.213917	-0.0595746	0.872192	0.807415	0.942165	0.0393738	-3.47302	0.000514645	1	depression
O3_mean_cat_4	-0.0939281	-0.185069	-0.002787	0.910348	0.831047	0.997217	0.0465014	-2.0199	0.043394	1	depression
O3_mean_cat_5	-0.0892281	-0.191483	0.0130269	0.914637	0.825734	1.01311	0.0521719	-1.71027	0.0872157	1	depression
O3_mean_cat_6	-0.0240319	-0.136941	0.0888768	0.976255	0.872022	1.09295	0.0576075	-0.417167	0.676556	1	depression
O3_mean_cat_7	0.0762248	-0.0499137	0.202363	1.07921	0.951311	1.22429	0.0643576	1.18439	0.236257	1	depression
OC_mean_cat_2	0.0783314	0.0292903	0.127373	1.08148	1.02972	1.13584	0.0250215	3.13057	0.00174468	1	depression
OC_mean_cat_3	0.062588	-0.000519398	0.125695	1.06459	0.999481	1.13394	0.0321982	1.94383	0.0519156	1	depression
OC_mean_cat_4	0.00300075	-0.0739242	0.0799257	1.00301	0.928742	1.08321	0.0392482	0.0764557	0.939057	1	depression
OC_mean_cat_5	-0.0225561	-0.117547	0.072435	0.977696	0.889099	1.07512	0.0484657	-0.465404	0.641642	1	depression
OC_mean_cat_6	-0.0977725	-0.213509	0.0179642	0.906855	0.807745	1.01813	0.0590504	-1.65575	0.0977733	1	depression
OC_mean_cat_7	-0.0498858	-0.191448	0.0916768	0.951338	0.825762	1.09601	0.0722271	-0.690679	0.489767	1	depression
PM10_mean_cat_2	-0.167826	-0.233791	-0.101861	0.845501	0.791527	0.903155	0.0336564	-4.98646	6.1497e-07	1	depression
PM10_mean_cat_3	-0.22904	-0.313665	-0.144415	0.795297	0.730764	0.865528	0.0431767	-5.30472	1.12847e-07	1	depression
PM10_mean_cat_4	-0.247199	-0.346845	-0.147554	0.780985	0.706915	0.862816	0.0508404	-4.86227	1.1605e-06	1	depression
PM10_mean_cat_5	-0.255067	-0.369312	-0.140821	0.774865	0.691209	0.868645	0.0582897	-4.37584	1.20965e-05	1	depression
PM10_mean_cat_6	-0.244194	-0.373213	-0.115176	0.783336	0.688519	0.89121	0.0658269	-3.70964	0.000207555	1	depression
PM10_mean_cat_7	-0.126551	-0.271011	0.0179094	0.881129	0.762608	1.01807	0.0737055	-1.71698	0.0859831	1	depression
PM25_mean_cat_2	0.0650192	-0.00787128	0.13791	1.06718	0.99216	1.14787	0.0371897	1.74831	0.08041	1	depression
PM25_mean_cat_3	0.0279093	-0.0713117	0.12713	1.0283	0.931172	1.13556	0.0506239	0.551307	0.581423	1	depression
PM25_mean_cat_4	0.055437	-0.0644545	0.175329	1.057	0.937579	1.19164	0.0611703	0.906274	0.364791	1	depression
PM25_mean_cat_5	0.0858296	-0.0503652	0.222024	1.08962	0.950882	1.2486	0.0694884	1.23516	0.216769	1	depression
PM25_mean_cat_6	0.0805449	-0.0705879	0.231678	1.08388	0.931846	1.26071	0.07711	1.04455	0.296233	1	depression
PM25_mean_cat_7	0.116158	-0.0521185	0.284434	1.12317	0.949216	1.32901	0.0858567	1.35292	0.17608	1	depression
SEASALT_mean_cat_2	-0.0317742	-0.0707408	0.00719237	0.968725	0.931703	1.00722	0.0198813	-1.5982	0.109999	1	depression
SEASALT_mean_cat_3	-0.0576268	-0.103502	-0.0117516	0.944002	0.901674	0.988317	0.0234062	-2.46204	0.013815	1	depression
SEASALT_mean_cat_4	0.00537262	-0.0435986	0.0543438	1.00539	0.957338	1.05585	0.0249858	0.215027	0.829746	1	depression
SEASALT_mean_cat_5	0.0287227	-0.0235259	0.0809714	1.02914	0.976749	1.08434	0.026658	1.07745	0.281278	1	depression
SEASALT_mean_cat_6	0.0623062	0.00683261	0.11778	1.06429	1.00686	1.125	0.0283034	2.20137	0.0277098	1	depression
SEASALT_mean_cat_7	0.295775	0.233661	0.35789	1.34417	1.26322	1.43031	0.0316918	9.33288	1.03031e-20	1	depression
sia_mean_cat_2	-0.0389037	-0.137378	0.0595709	0.961843	0.871641	1.06138	0.050243	-0.774309	0.438748	1	depression
sia_mean_cat_3	-0.0314378	-0.160946	0.09807	0.969051	0.851338	1.10304	0.0660766	-0.475778	0.634233	1	depression
sia_mean_cat_4	-0.102407	-0.252091	0.0472756	0.902662	0.777174	1.04841	0.0763703	-1.34093	0.179942	1	depression
sia_mean_cat_5	-0.141864	-0.308449	0.0247204	0.867739	0.734585	1.02503	0.0849938	-1.66911	0.0950946	1	depression
sia_mean_cat_6	-0.1306	-0.311646	0.050446	0.877569	0.732241	1.05174	0.092372	-1.41385	0.157407	1	depression
sia_mean_cat_7	-0.147054	-0.342897	0.0487898	0.863248	0.709711	1.05	0.099922	-1.47168	0.141106	1	depression
SO2_mean_cat_2	0.179567	0.108438	0.250696	1.1967	1.11454	1.28492	0.036291	4.94797	7.49908e-07	1	depression
SO2_mean_cat_3	0.172945	0.0812468	0.264644	1.1888	1.08464	1.30297	0.0467858	3.69653	0.000218565	1	depression
SO2_mean_cat_4	0.0901154	-0.0196198	0.199851	1.0943	0.980571	1.22122	0.0559884	1.60954	0.107499	1	depression
SO2_mean_cat_5	0.00301732	-0.121589	0.127624	1.00302	0.885512	1.13613	0.063576	0.04746	0.962147	1	depression
SO2_mean_cat_6	-0.0465205	-0.184322	0.0912807	0.954545	0.831668	1.09558	0.070308	-0.661667	0.508185	1	depression
SO2_mean_cat_7	-0.0451872	-0.197794	0.10742	0.955819	0.820539	1.1134	0.0778621	-0.580349	0.561679	1	depression
SO4_mean_cat_2	0.145213	0.0438328	0.246594	1.15629	1.04481	1.27966	0.0517258	2.80737	0.00499477	1	depression
SO4_mean_cat_3	0.0864462	-0.0514251	0.224318	1.09029	0.949875	1.25147	0.0703438	1.22891	0.219106	1	depression
SO4_mean_cat_4	0.203279	0.0415236	0.365034	1.22541	1.0424	1.44056	0.0825297	2.4631	0.0137742	1	depression
SO4_mean_cat_5	0.257448	0.0782739	0.436621	1.29362	1.08142	1.54747	0.0914168	2.8162	0.00485961	1	depression
SO4_mean_cat_6	0.256602	0.0642383	0.448965	1.29253	1.06635	1.56669	0.0981465	2.61448	0.00893639	1	depression
SO4_mean_cat_7	0.224684	0.0198583	0.429509	1.25193	1.02006	1.5365	0.104505	2.14999	0.0315562	1	depression
CO_mean_cat_2	0.104762	0.0439368	0.165588	1.11045	1.04492	1.18009	0.0310339	3.37573	0.000736203	2	depression
CO_mean_cat_3	0.17808	0.102969	0.253191	1.19492	1.10846	1.28813	0.0383226	4.64687	3.37008e-06	2	depression
CO_mean_cat_4	0.223862	0.13679	0.310934	1.2509	1.14659	1.3647	0.0444254	5.03906	4.67835e-07	2	depression
CO_mean_cat_5	0.296573	0.199513	0.393633	1.34524	1.22081	1.48236	0.0495212	5.98881	2.1138e-09	2	depression
CO_mean_cat_6	0.361713	0.25193	0.471496	1.43579	1.28651	1.60239	0.0560126	6.45771	1.06298e-10	2	depression
CO_mean_cat_7	0.373444	0.246405	0.500484	1.45273	1.27942	1.64952	0.0648172	5.7615	8.33684e-09	2	depression
EC_mean_cat_2	0.0718896	0.0169197	0.12686	1.07454	1.01706	1.13526	0.0280464	2.56324	0.01037	2	depression
EC_mean_cat_3	0.0996599	0.0268862	0.172434	1.1048	1.02725	1.18819	0.0371301	2.68407	0.00727315	2	depression
EC_mean_cat_4	0.0852108	-0.0038189	0.17424	1.08895	0.996188	1.19034	0.0454241	1.87589	0.0606701	2	depression
EC_mean_cat_5	0.0930965	-0.0145352	0.200728	1.09757	0.98557	1.22229	0.0549151	1.69528	0.0900224	2	depression
EC_mean_cat_6	0.162171	0.0337286	0.290613	1.17606	1.0343	1.33725	0.0655328	2.47465	0.0133368	2	depression
EC_mean_cat_7	0.139372	-0.0153018	0.294045	1.14955	0.984815	1.34184	0.0789166	1.76606	0.077385	2	depression
NH4_mean_cat_2	-0.188241	-0.271879	-0.104603	0.828415	0.761946	0.900682	0.0426734	-4.4112	1.02798e-05	2	depression
NH4_mean_cat_3	-0.260242	-0.3664	-0.154084	0.770865	0.693225	0.8572	0.0541634	-4.80476	1.5494e-06	2	depression
NH4_mean_cat_4	-0.233424	-0.354153	-0.112695	0.791818	0.701768	0.893423	0.0615975	-3.7895	0.000150951	2	depression
NH4_mean_cat_5	-0.197224	-0.330516	-0.0639321	0.821007	0.718553	0.938069	0.0680074	-2.90004	0.00373115	2	depression
NH4_mean_cat_6	-0.133245	-0.278386	0.0118964	0.875251	0.757004	1.01197	0.074053	-1.79932	0.0719686	2	depression
NH4_mean_cat_7	-0.0563023	-0.21239	0.0997851	0.945253	0.80865	1.10493	0.0796379	-0.706979	0.47958	2	depression
NO2_mean_cat_2	0.101799	-0.0127472	0.216346	1.10716	0.987334	1.24153	0.0584432	1.74185	0.0815346	2	depression
NO2_mean_cat_3	0.16902	0.0327319	0.305308	1.18414	1.03327	1.35704	0.0695361	2.43068	0.0150705	2	depression
NO2_mean_cat_4	0.206365	0.0548881	0.357842	1.2292	1.05642	1.43024	0.0772855	2.67016	0.00758144	2	depression
NO2_mean_cat_5	0.270757	0.105114	0.4364	1.31096	1.11084	1.54713	0.0845131	3.20373	0.0013566	2	depression
NO2_mean_cat_6	0.230211	0.051034	0.409388	1.25887	1.05236	1.5059	0.0914184	2.51821	0.0117953	2	depression
NO2_mean_cat_7	0.110023	-0.0823917	0.302437	1.1163	0.920911	1.35315	0.0981724	1.12071	0.262412	2	depression
NO3_mean_cat_2	0.168553	0.108727	0.228379	1.18359	1.11486	1.25656	0.030524	5.52197	3.35222e-08	2	depression
NO3_mean_cat_3	0.311741	0.24275	0.380731	1.3658	1.27475	1.46335	0.0351998	8.85632	8.26977e-19	2	depression
NO3_mean_cat_4	0.362506	0.285836	0.439175	1.43693	1.33087	1.55143	0.0391179	9.26701	1.91431e-20	2	depression
NO3_mean_cat_5	0.366599	0.281532	0.451666	1.44282	1.32516	1.57093	0.0434024	8.44653	3.00096e-17	2	depression
NO3_mean_cat_6	0.307865	0.213487	0.402243	1.36052	1.23799	1.49517	0.048153	6.39348	1.62154e-10	2	depression
NO3_mean_cat_7	0.162944	0.0562483	0.269639	1.17697	1.05786	1.30949	0.0544375	2.99323	0.00276044	2	depression
NOX_mean_cat_2	0.0375883	-0.074899	0.150076	1.0383	0.927837	1.16192	0.0573925	0.654933	0.512511	2	depression
NOX_mean_cat_3	0.0821001	-0.0479982	0.212198	1.08556	0.953136	1.23639	0.0663779	1.23686	0.216139	2	depression
NOX_mean_cat_4	0.0827331	-0.0599949	0.225461	1.08625	0.941769	1.2529	0.0728217	1.1361	0.255913	2	depression
NOX_mean_cat_5	0.120862	-0.0330263	0.274751	1.12847	0.967513	1.3162	0.0785161	1.53933	0.123723	2	depression
NOX_mean_cat_6	0.120048	-0.0428197	0.282915	1.12755	0.958084	1.32699	0.0830971	1.44467	0.148551	2	depression
NOX_mean_cat_7	0.105294	-0.0635643	0.274153	1.11104	0.938414	1.31542	0.0861539	1.22216	0.221645	2	depression
O3_mean_cat_2	-0.127493	-0.184518	-0.0704675	0.8803	0.831505	0.931958	0.0290951	-4.38193	1.17632e-05	2	depression
O3_mean_cat_3	-0.13756	-0.21472	-0.0603999	0.871482	0.806768	0.941388	0.039368	-3.4942	0.000475484	2	depression
O3_mean_cat_4	-0.0966299	-0.187782	-0.00547805	0.907892	0.828796	0.994537	0.0465069	-2.07775	0.037732	2	depression
O3_mean_cat_5	-0.0933693	-0.195639	0.0089006	0.910857	0.822309	1.00894	0.0521795	-1.78939	0.0735525	2	depression
O3_mean_cat_6	-0.0268457	-0.139782	0.0860904	0.973511	0.869548	1.0899	0.0576215	-0.465897	0.641289	2	depression
O3_mean_cat_7	0.0738081	-0.0523669	0.199983	1.0766	0.948981	1.22138	0.0643762	1.14651	0.251583	2	depression
OC_mean_cat_2	0.0759769	0.0269451	0.125009	1.07894	1.02731	1.13316	0.0250167	3.03705	0.00238906	2	depression
OC_mean_cat_3	0.0598752	-0.00323133	0.122982	1.0617	0.996774	1.13086	0.0321978	1.85961	0.0629414	2	depression
OC_mean_cat_4	0.00180304	-0.0751289	0.078735	1.0018	0.927624	1.08192	0.0392517	0.0459353	0.963362	2	depression
OC_mean_cat_5	-0.0235926	-0.118604	0.0714186	0.976684	0.88816	1.07403	0.048476	-0.486686	0.626481	2	depression
OC_mean_cat_6	-0.100509	-0.216291	0.0152731	0.904377	0.805501	1.01539	0.0590735	-1.70142	0.0888641	2	depression
OC_mean_cat_7	-0.0551938	-0.196854	0.0864666	0.946302	0.82131	1.09031	0.072277	-0.763642	0.44508	2	depression
PM10_mean_cat_2	-0.170604	-0.236542	-0.104666	0.843155	0.789353	0.900625	0.0336424	-5.07111	3.95502e-07	2	depression
PM10_mean_cat_3	-0.232875	-0.317485	-0.148265	0.792253	0.727977	0.862203	0.0431693	-5.39445	6.87329e-08	2	depression
PM10_mean_cat_4	-0.252082	-0.351751	-0.152414	0.777181	0.703455	0.858633	0.0508522	-4.95716	7.15313e-07	2	depression
PM10_mean_cat_5	-0.257678	-0.371955	-0.143401	0.772844	0.689385	0.866406	0.0583057	-4.41943	9.89601e-06	2	depression
PM10_mean_cat_6	-0.24458	-0.373614	-0.115545	0.783034	0.688243	0.89088	0.065835	-3.71504	0.000203172	2	depression
PM10_mean_cat_7	-0.128023	-0.272493	0.0164467	0.879833	0.761479	1.01658	0.0737104	-1.73684	0.0824157	2	depression
PM25_mean_cat_2	0.0649968	-0.00790814	0.137902	1.06716	0.992123	1.14786	0.0371971	1.74736	0.0805744	2	depression
PM25_mean_cat_3	0.0311759	-0.0680485	0.1304	1.03167	0.934215	1.13928	0.0506256	0.615812	0.538018	2	depression
PM25_mean_cat_4	0.0607051	-0.0591794	0.18059	1.06259	0.942538	1.19792	0.0611667	0.992453	0.320976	2	depression
PM25_mean_cat_5	0.0886765	-0.0475324	0.224885	1.09273	0.95358	1.25218	0.0694956	1.276	0.201955	2	depression
PM25_mean_cat_6	0.0819542	-0.0691786	0.233087	1.08541	0.93316	1.26249	0.07711	1.06282	0.287863	2	depression
PM25_mean_cat_7	0.118821	-0.0494756	0.287117	1.12617	0.951728	1.33258	0.085867	1.38378	0.166427	2	depression
SEASALT_mean_cat_2	-0.0313823	-0.0703622	0.00759755	0.969105	0.932056	1.00763	0.019888	-1.57795	0.114578	2	depression
SEASALT_mean_cat_3	-0.057444	-0.103328	-0.0115599	0.944175	0.901831	0.988507	0.0234107	-2.45375	0.0141375	2	depression
SEASALT_mean_cat_4	0.00490013	-0.0440953	0.0538956	1.00491	0.956863	1.05537	0.0249981	0.19602	0.844595	2	depression
SEASALT_mean_cat_5	0.0285881	-0.0236715	0.0808477	1.029	0.976606	1.08421	0.0266636	1.07218	0.28364	2	depression
SEASALT_mean_cat_6	0.0624356	0.00694035	0.117931	1.06443	1.00696	1.12517	0.0283144	2.20508	0.0274484	2	depression
SEASALT_mean_cat_7	0.294657	0.232522	0.356792	1.34267	1.26178	1.42874	0.031702	9.29458	1.47787e-20	2	depression
sia_mean_cat_2	-0.0368737	-0.135213	0.0614654	0.963798	0.87353	1.06339	0.0501739	-0.734917	0.46239	2	depression
sia_mean_cat_3	-0.0306362	-0.160045	0.0987728	0.969828	0.852105	1.10382	0.0660262	-0.464	0.642648	2	depression
sia_mean_cat_4	-0.102302	-0.251908	0.0473031	0.902757	0.777316	1.04844	0.0763307	-1.34025	0.180164	2	depression
sia_mean_cat_5	-0.14148	-0.308019	0.0250588	0.868072	0.734901	1.02538	0.0849705	-1.66505	0.0959023	2	depression
sia_mean_cat_6	-0.131995	-0.312976	0.0489862	0.876346	0.731268	1.05021	0.0923389	-1.42946	0.152872	2	depression
sia_mean_cat_7	-0.1482	-0.344029	0.0476294	0.862259	0.708909	1.04878	0.0999146	-1.48326	0.138004	2	depression
SO2_mean_cat_2	0.178912	0.107775	0.25005	1.19592	1.1138	1.28409	0.0362952	4.92938	8.24928e-07	2	depression
SO2_mean_cat_3	0.170467	0.078749	0.262185	1.18586	1.08193	1.29977	0.0467957	3.64279	0.0002697	2	depression
SO2_mean_cat_4	0.0875612	-0.022164	0.197287	1.09151	0.97808	1.21809	0.0559833	1.56406	0.117804	2	depression
SO2_mean_cat_5	-0.00111057	-0.125719	0.123498	0.99889	0.881863	1.13145	0.0635767	-0.0174682	0.986063	2	depression
SO2_mean_cat_6	-0.0452483	-0.183048	0.092551	0.95576	0.832729	1.09697	0.070307	-0.643582	0.519847	2	depression
SO2_mean_cat_7	-0.0461044	-0.198696	0.106488	0.954942	0.819799	1.11236	0.0778545	-0.592187	0.553725	2	depression
SO4_mean_cat_2	0.142742	0.0413929	0.244091	1.15343	1.04226	1.27646	0.0517097	2.76045	0.00577217	2	depression
SO4_mean_cat_3	0.0833262	-0.0545398	0.221192	1.0869	0.946921	1.24756	0.0703411	1.1846	0.236175	2	depression
SO4_mean_cat_4	0.19929	0.0375552	0.361026	1.22054	1.03827	1.4348	0.0825195	2.41507	0.0157321	2	depression
SO4_mean_cat_5	0.254284	0.0751354	0.433433	1.28954	1.07803	1.54254	0.0914041	2.78198	0.00540287	2	depression
SO4_mean_cat_6	0.249616	0.0572846	0.441948	1.28353	1.05896	1.55573	0.0981302	2.54373	0.0109677	2	depression
SO4_mean_cat_7	0.22182	0.0169999	0.42664	1.24835	1.01715	1.5321	0.104502	2.12264	0.0337841	2	depression
CO_mean_cat_2	0.111914	0.0490047	0.174823	1.11842	1.05023	1.19103	0.032097	3.48674	0.000488956	3	depression
CO_mean_cat_3	0.185145	0.107219	0.26307	1.20339	1.11318	1.30092	0.0397586	4.65672	3.21293e-06	3	depression
CO_mean_cat_4	0.236384	0.145965	0.326803	1.26666	1.15716	1.38653	0.046133	5.12396	2.99181e-07	3	depression
CO_mean_cat_5	0.310827	0.209918	0.411736	1.36455	1.23358	1.50944	0.0514853	6.0372	1.56808e-09	3	depression
CO_mean_cat_6	0.376593	0.26229	0.490896	1.45731	1.2999	1.63378	0.0583188	6.45749	1.06455e-10	3	depression
CO_mean_cat_7	0.38378	0.251163	0.516396	1.46782	1.28552	1.67598	0.0676626	5.67196	1.41176e-08	3	depression
EC_mean_cat_2	0.0830275	0.0259961	0.140059	1.08657	1.02634	1.15034	0.0290982	2.85336	0.004326	3	depression
EC_mean_cat_3	0.0995615	0.0239884	0.175135	1.10469	1.02428	1.19141	0.0385584	2.5821	0.00982025	3	depression
EC_mean_cat_4	0.0885233	-0.00401414	0.181061	1.09256	0.995994	1.19849	0.0472138	1.87494	0.0608005	3	depression
EC_mean_cat_5	0.0890551	-0.0230177	0.201128	1.09314	0.977245	1.22278	0.0571811	1.55742	0.11937	3	depression
EC_mean_cat_6	0.17098	0.0368957	0.305065	1.18647	1.03758	1.35671	0.0684117	2.49928	0.0124445	3	depression
EC_mean_cat_7	0.132538	-0.0297747	0.294851	1.14172	0.970664	1.34293	0.0828141	1.60043	0.109504	3	depression
NH4_mean_cat_2	-0.155073	-0.242134	-0.0680122	0.856353	0.784951	0.934249	0.0444197	-3.49109	0.000481051	3	depression
NH4_mean_cat_3	-0.217821	-0.328259	-0.107383	0.80427	0.720177	0.898182	0.056347	-3.86571	0.000110768	3	depression
NH4_mean_cat_4	-0.18693	-0.312613	-0.0612469	0.829502	0.731533	0.940591	0.0641253	-2.91508	0.00355601	3	depression
NH4_mean_cat_5	-0.14856	-0.287457	-0.00966328	0.861948	0.750169	0.990383	0.070867	-2.09632	0.0360536	3	depression
NH4_mean_cat_6	-0.0869726	-0.238399	0.0644543	0.916702	0.787888	1.06658	0.07726	-1.12571	0.260287	3	depression
NH4_mean_cat_7	-0.0128044	-0.175863	0.150254	0.987277	0.838733	1.16213	0.0831945	-0.15391	0.877681	3	depression
NO2_mean_cat_2	0.118528	-0.000121445	0.237177	1.12584	0.999879	1.26767	0.0605365	1.95796	0.050235	3	depression
NO2_mean_cat_3	0.179066	0.0378585	0.320273	1.1961	1.03858	1.3775	0.0720459	2.48544	0.0129391	3	depression
NO2_mean_cat_4	0.216724	0.0596848	0.373763	1.242	1.0615	1.45319	0.0801235	2.70487	0.00683303	3	depression
NO2_mean_cat_5	0.271932	0.0999953	0.443868	1.3125	1.10517	1.55873	0.0877244	3.09984	0.00193622	3	depression
NO2_mean_cat_6	0.231029	0.0446737	0.417385	1.2599	1.04569	1.51799	0.0950812	2.42981	0.0151066	3	depression
NO2_mean_cat_7	0.107354	-0.0931798	0.307888	1.11333	0.91103	1.36055	0.102315	1.04925	0.294063	3	depression
NO3_mean_cat_2	0.160791	0.0987476	0.222834	1.17444	1.10379	1.24961	0.0316553	5.07942	3.7858e-07	3	depression
NO3_mean_cat_3	0.302142	0.230449	0.373834	1.35275	1.25917	1.4533	0.0365785	8.26009	1.45566e-16	3	depression
NO3_mean_cat_4	0.34626	0.266431	0.426088	1.41377	1.3053	1.53126	0.0407296	8.50143	1.87272e-17	3	depression
NO3_mean_cat_5	0.349442	0.260747	0.438136	1.41828	1.2979	1.54982	0.0452531	7.72194	1.14574e-14	3	depression
NO3_mean_cat_6	0.289921	0.191319	0.388522	1.33632	1.21085	1.4748	0.0503079	5.76293	8.26665e-09	3	depression
NO3_mean_cat_7	0.154827	0.0431628	0.266491	1.16746	1.04411	1.30538	0.0569725	2.71757	0.00657628	3	depression
NOX_mean_cat_2	0.0203806	-0.0961481	0.136909	1.02059	0.908329	1.14672	0.0594545	0.342793	0.731754	3	depression
NOX_mean_cat_3	0.0816853	-0.0530703	0.216441	1.08511	0.948313	1.24165	0.0687541	1.18808	0.234802	3	depression
NOX_mean_cat_4	0.0845974	-0.0633128	0.232508	1.08828	0.93865	1.26176	0.0754658	1.121	0.262287	3	depression
NOX_mean_cat_5	0.123124	-0.0365474	0.282796	1.13102	0.964112	1.32683	0.0814665	1.51135	0.1307	3	depression
NOX_mean_cat_6	0.107682	-0.0615961	0.276961	1.11369	0.940263	1.31911	0.0863682	1.24678	0.212477	3	depression
NOX_mean_cat_7	0.0970414	-0.0786661	0.272749	1.10191	0.924349	1.31357	0.0896483	1.08247	0.279045	3	depression
O3_mean_cat_2	-0.126144	-0.186525	-0.0657637	0.881488	0.829838	0.936352	0.0308071	-4.09466	4.22787e-05	3	depression
O3_mean_cat_3	-0.15386	-0.235319	-0.0724005	0.857392	0.790319	0.930158	0.0415615	-3.70197	0.00021393	3	depression
O3_mean_cat_4	-0.120982	-0.216956	-0.0250074	0.88605	0.804965	0.975303	0.0489675	-2.47066	0.0134864	3	depression
O3_mean_cat_5	-0.115522	-0.223001	-0.00804249	0.890901	0.800114	0.99199	0.0548374	-2.10662	0.0351501	3	depression
O3_mean_cat_6	-0.0477892	-0.16624	0.0706612	0.953335	0.846843	1.07322	0.060435	-0.790754	0.429088	3	depression
O3_mean_cat_7	0.0463798	-0.0857684	0.178528	1.04747	0.917807	1.19546	0.0674238	0.687885	0.491525	3	depression
OC_mean_cat_2	0.0736177	0.0228495	0.124386	1.0764	1.02311	1.13245	0.0259026	2.84209	0.00448182	3	depression
OC_mean_cat_3	0.0493832	-0.0160672	0.114834	1.05062	0.984061	1.12169	0.0333937	1.47882	0.139189	3	depression
OC_mean_cat_4	-0.00725078	-0.0871568	0.0726552	0.992775	0.916533	1.07536	0.0407691	-0.17785	0.858841	3	depression
OC_mean_cat_5	-0.0336519	-0.132583	0.0652789	0.966908	0.87583	1.06746	0.0504758	-0.666693	0.504968	3	depression
OC_mean_cat_6	-0.122658	-0.243619	-0.00169688	0.884566	0.783786	0.998305	0.061716	-1.98746	0.0468716	3	depression
OC_mean_cat_7	-0.0424023	-0.191272	0.106468	0.958484	0.825908	1.11234	0.0759554	-0.558253	0.576672	3	depression
PM10_mean_cat_2	-0.160609	-0.22903	-0.0921876	0.851625	0.795304	0.911934	0.0349095	-4.60072	4.2103e-06	3	depression
PM10_mean_cat_3	-0.208844	-0.29664	-0.121049	0.811522	0.743312	0.885991	0.0447945	-4.66228	3.12729e-06	3	depression
PM10_mean_cat_4	-0.226982	-0.330522	-0.123441	0.796935	0.718548	0.883874	0.0528278	-4.29663	1.73413e-05	3	depression
PM10_mean_cat_5	-0.225026	-0.343947	-0.106106	0.798495	0.708967	0.899329	0.0606746	-3.70874	0.000208291	3	depression
PM10_mean_cat_6	-0.208742	-0.343309	-0.0741749	0.811605	0.709419	0.928509	0.068658	-3.04032	0.00236328	3	depression
PM10_mean_cat_7	-0.0958771	-0.246887	0.0551331	0.908576	0.781229	1.05668	0.0770474	-1.24439	0.213356	3	depression
PM25_mean_cat_2	0.0450235	-0.0304185	0.120465	1.04605	0.97004	1.12802	0.0384915	1.1697	0.242122	3	depression
PM25_mean_cat_3	0.0151532	-0.0875818	0.117888	1.01527	0.916144	1.12512	0.0524168	0.289091	0.772512	3	depression
PM25_mean_cat_4	0.0475564	-0.0766887	0.171802	1.04871	0.926178	1.18744	0.0633915	0.750202	0.453133	3	depression
PM25_mean_cat_5	0.0727566	-0.0686346	0.214148	1.07547	0.933668	1.23881	0.0721397	1.00855	0.31319	3	depression
PM25_mean_cat_6	0.0738903	-0.083318	0.231099	1.07669	0.920059	1.25998	0.0802098	0.921213	0.356939	3	depression
PM25_mean_cat_7	0.0980007	-0.0775263	0.273528	1.10296	0.925403	1.31459	0.0895562	1.09429	0.273827	3	depression
SEASALT_mean_cat_2	-0.0288527	-0.0699489	0.0122436	0.97156	0.932441	1.01232	0.0209679	-1.37604	0.168808	3	depression
SEASALT_mean_cat_3	-0.0583819	-0.106638	-0.0101258	0.94329	0.898851	0.989925	0.0246209	-2.37123	0.0177289	3	depression
SEASALT_mean_cat_4	-0.00358287	-0.0550345	0.0478688	0.996424	0.946452	1.04903	0.0262513	-0.136483	0.891439	3	depression
SEASALT_mean_cat_5	0.0147272	-0.0401221	0.0695765	1.01484	0.960672	1.07205	0.0279848	0.526255	0.598711	3	depression
SEASALT_mean_cat_6	0.0543236	-0.00386894	0.112516	1.05583	0.996139	1.11909	0.0296906	1.82966	0.0673015	3	depression
SEASALT_mean_cat_7	0.279703	0.214504	0.344902	1.32274	1.23925	1.41185	0.0332652	8.40828	4.16066e-17	3	depression
sia_mean_cat_2	-0.0529941	-0.154952	0.0489642	0.948386	0.856456	1.05018	0.0520205	-1.01871	0.308338	3	depression
sia_mean_cat_3	-0.0558479	-0.189954	0.0782587	0.945683	0.826997	1.0814	0.068423	-0.816215	0.414377	3	depression
sia_mean_cat_4	-0.135803	-0.290996	0.0193904	0.873015	0.747518	1.01958	0.0791817	-1.71508	0.0863308	3	depression
sia_mean_cat_5	-0.176971	-0.349976	-0.003965	0.837804	0.704705	0.996043	0.0882698	-2.00488	0.0449755	3	depression
sia_mean_cat_6	-0.162388	-0.35068	0.0259036	0.850111	0.704209	1.02624	0.096069	-1.69033	0.0909651	3	depression
sia_mean_cat_7	-0.182205	-0.386317	0.0219064	0.83343	0.679555	1.02215	0.104141	-1.74961	0.0801858	3	depression
SO2_mean_cat_2	0.179948	0.106523	0.253374	1.19716	1.1124	1.28836	0.0374625	4.80342	1.55978e-06	3	depression
SO2_mean_cat_3	0.157847	0.0628662	0.252828	1.17099	1.06488	1.28766	0.0484606	3.25723	0.00112506	3	depression
SO2_mean_cat_4	0.0675529	-0.0462924	0.181398	1.06989	0.954763	1.19889	0.0580855	1.16299	0.244833	3	depression
SO2_mean_cat_5	-0.0288652	-0.1584	0.100669	0.971547	0.853509	1.10591	0.0660903	-0.436754	0.66229	3	depression
SO2_mean_cat_6	-0.0714065	-0.214893	0.0720803	0.931083	0.806628	1.07474	0.0732089	-0.97538	0.329372	3	depression
SO2_mean_cat_7	-0.074276	-0.233514	0.0849619	0.928415	0.791747	1.08868	0.0812453	-0.914218	0.360602	3	depression
SO4_mean_cat_2	0.127142	0.0224874	0.231797	1.13558	1.02274	1.26086	0.0533964	2.3811	0.0172608	3	depression
SO4_mean_cat_3	0.0746879	-0.0678334	0.217209	1.07755	0.934416	1.2426	0.0727163	1.02711	0.304367	3	depression
SO4_mean_cat_4	0.195231	0.0276975	0.362764	1.21559	1.02808	1.4373	0.0854778	2.284	0.0223718	3	depression
SO4_mean_cat_5	0.25701	0.0712018	0.442818	1.29306	1.0738	1.55709	0.0948017	2.71102	0.00670757	3	depression
SO4_mean_cat_6	0.247343	0.0475277	0.447157	1.28062	1.04868	1.56386	0.101948	2.42616	0.0152596	3	depression
SO4_mean_cat_7	0.238231	0.0251155	0.451346	1.269	1.02543	1.57042	0.108734	2.19094	0.0284558	3	depression
CO_mean_cat_2	0.11941	0.0563542	0.182465	1.12683	1.05797	1.20017	0.0321717	3.71163	0.000205927	4	depression
CO_mean_cat_3	0.195965	0.117786	0.274143	1.21648	1.125	1.3154	0.0398876	4.91292	8.97315e-07	4	depression
CO_mean_cat_4	0.250871	0.160112	0.341629	1.28514	1.17364	1.40724	0.0463062	5.41765	6.03885e-08	4	depression
CO_mean_cat_5	0.326551	0.225191	0.42791	1.38618	1.25256	1.53405	0.0517149	6.31444	2.71143e-10	4	depression
CO_mean_cat_6	0.395411	0.280562	0.51026	1.48499	1.32387	1.66572	0.0585976	6.7479	1.50003e-11	4	depression
CO_mean_cat_7	0.426333	0.292868	0.559798	1.53163	1.34027	1.75032	0.0680957	6.26079	3.83038e-10	4	depression
EC_mean_cat_2	0.0845788	0.0272063	0.141951	1.08826	1.02758	1.15252	0.0292722	2.88939	0.0038599	4	depression
EC_mean_cat_3	0.0991481	0.0230677	0.175229	1.10423	1.02334	1.19152	0.0388173	2.55423	0.0106424	4	depression
EC_mean_cat_4	0.090124	-0.00318378	0.183432	1.09431	0.996821	1.20133	0.0476069	1.89309	0.0583462	4	depression
EC_mean_cat_5	0.105984	-0.0069951	0.218963	1.1118	0.993029	1.24479	0.0576434	1.83861	0.0659722	4	depression
EC_mean_cat_6	0.200344	0.0654545	0.335233	1.22182	1.06764	1.39827	0.0688222	2.91103	0.0036024	4	depression
EC_mean_cat_7	0.15602	-0.00727618	0.319316	1.16885	0.99275	1.37619	0.0833159	1.87263	0.0611193	4	depression
NH4_mean_cat_2	-0.168149	-0.255263	-0.0810339	0.845228	0.774713	0.922162	0.0444471	-3.78312	0.000154876	4	depression
NH4_mean_cat_3	-0.24291	-0.353671	-0.132149	0.784342	0.702106	0.87621	0.0565118	-4.2984	1.72032e-05	4	depression
NH4_mean_cat_4	-0.218841	-0.345043	-0.0926387	0.803449	0.70819	0.911523	0.0643901	-3.39867	0.000677135	4	depression
NH4_mean_cat_5	-0.188226	-0.32786	-0.0485914	0.828428	0.720464	0.95257	0.0712432	-2.64201	0.00824149	4	depression
NH4_mean_cat_6	-0.132701	-0.285068	0.0196666	0.875727	0.751963	1.01986	0.0777399	-1.70698	0.087825	4	depression
NH4_mean_cat_7	-0.0713139	-0.235531	0.0929027	0.93117	0.790152	1.09735	0.0837855	-0.851148	0.394687	4	depression
NO2_mean_cat_2	0.12505	0.00594623	0.244153	1.1332	1.00596	1.27654	0.0607681	2.05782	0.0396079	4	depression
NO2_mean_cat_3	0.163865	0.022018	0.305712	1.17806	1.02226	1.35759	0.0723721	2.2642	0.023562	4	depression
NO2_mean_cat_4	0.167288	0.00951302	0.325062	1.18209	1.00956	1.38412	0.0804987	2.07814	0.0376965	4	depression
NO2_mean_cat_5	0.19453	0.0219021	0.367157	1.21474	1.02214	1.44362	0.0880769	2.20863	0.0272001	4	depression
NO2_mean_cat_6	0.137434	-0.0496697	0.324537	1.14733	0.951544	1.38339	0.0954627	1.43966	0.149964	4	depression
NO2_mean_cat_7	0.00161577	-0.199897	0.203129	1.00162	0.818815	1.22523	0.102815	0.0157154	0.987461	4	depression
NO3_mean_cat_2	0.15911	0.0968394	0.221382	1.17247	1.10168	1.2478	0.0317715	5.00796	5.50112e-07	4	depression
NO3_mean_cat_3	0.295311	0.223181	0.367442	1.34354	1.25005	1.44404	0.0368022	8.02429	1.02113e-15	4	depression
NO3_mean_cat_4	0.340451	0.260029	0.420874	1.40558	1.29697	1.52329	0.0410325	8.29712	1.06664e-16	4	depression
NO3_mean_cat_5	0.341613	0.252167	0.431059	1.40722	1.28681	1.53889	0.0456366	7.4855	7.1275e-14	4	depression
NO3_mean_cat_6	0.274943	0.175447	0.374439	1.31646	1.19178	1.45418	0.0507643	5.41607	6.09236e-08	4	depression
NO3_mean_cat_7	0.139356	0.026646	0.252067	1.14953	1.027	1.28668	0.0575064	2.42332	0.0153794	4	depression
NOX_mean_cat_2	0.0167796	-0.100168	0.133727	1.01692	0.904686	1.14308	0.0596681	0.281216	0.778544	4	depression
NOX_mean_cat_3	0.0943672	-0.0409641	0.229699	1.09896	0.959864	1.25822	0.0690479	1.36669	0.171722	4	depression
NOX_mean_cat_4	0.116	-0.032675	0.264674	1.123	0.967853	1.30301	0.0758558	1.52921	0.126212	4	depression
NOX_mean_cat_5	0.170743	0.0100437	0.331442	1.18619	1.01009	1.39298	0.0819908	2.08246	0.0373003	4	depression
NOX_mean_cat_6	0.167341	-0.00329427	0.337977	1.18216	0.996711	1.40211	0.0870605	1.92213	0.05459	4	depression
NOX_mean_cat_7	0.158376	-0.0189304	0.335683	1.17161	0.981248	1.39889	0.0904642	1.75071	0.0799967	4	depression
O3_mean_cat_2	-0.103777	-0.16478	-0.0427745	0.901426	0.84808	0.958127	0.0311244	-3.33427	0.000855234	4	depression
O3_mean_cat_3	-0.12388	-0.206143	-0.0416176	0.883486	0.813717	0.959237	0.0419716	-2.95153	0.00316205	4	depression
O3_mean_cat_4	-0.0951549	-0.191815	0.00150473	0.909232	0.82546	1.00151	0.0493171	-1.92945	0.0536747	4	depression
O3_mean_cat_5	-0.104223	-0.212214	0.0037678	0.901024	0.808791	1.00377	0.0550984	-1.89158	0.0585468	4	depression
O3_mean_cat_6	-0.0469837	-0.165812	0.0718443	0.954103	0.847206	1.07449	0.0606276	-0.774955	0.438366	4	depression
O3_mean_cat_7	0.0507582	-0.0816677	0.183184	1.05207	0.921578	1.20104	0.0675655	0.751245	0.452505	4	depression
OC_mean_cat_2	0.0878532	0.0370372	0.138669	1.09183	1.03773	1.14874	0.025927	3.38848	0.000702807	4	depression
OC_mean_cat_3	0.0646257	-0.00102972	0.130281	1.06676	0.998971	1.13915	0.0334983	1.92922	0.053703	4	depression
OC_mean_cat_4	0.0262848	-0.0538826	0.106452	1.02663	0.947543	1.11232	0.0409025	0.642621	0.52047	4	depression
OC_mean_cat_5	0.0277653	-0.0714008	0.126931	1.02815	0.931089	1.13534	0.0505959	0.548766	0.583166	4	depression
OC_mean_cat_6	0.00408219	-0.118139	0.126303	1.00409	0.888573	1.13463	0.0623587	0.0654631	0.947805	4	depression
OC_mean_cat_7	0.100115	-0.0506375	0.250868	1.1053	0.950623	1.28514	0.076916	1.30162	0.193048	4	depression
PM10_mean_cat_2	-0.168945	-0.237501	-0.100389	0.844555	0.788596	0.904486	0.0349783	-4.83	1.36533e-06	4	depression
PM10_mean_cat_3	-0.224366	-0.312438	-0.136293	0.799023	0.731661	0.872587	0.0449356	-4.99305	5.94346e-07	4	depression
PM10_mean_cat_4	-0.249922	-0.353861	-0.145982	0.778862	0.701972	0.864174	0.0530316	-4.7127	2.44462e-06	4	depression
PM10_mean_cat_5	-0.253584	-0.373022	-0.134145	0.776015	0.68865	0.874463	0.0609393	-4.16125	3.16507e-05	4	depression
PM10_mean_cat_6	-0.239061	-0.374244	-0.103878	0.787367	0.687809	0.901336	0.0689724	-3.46604	0.000528186	4	depression
PM10_mean_cat_7	-0.125897	-0.277642	0.0258481	0.881706	0.757568	1.02619	0.0774224	-1.62611	0.103927	4	depression
PM25_mean_cat_2	0.0562807	-0.0193876	0.131949	1.05789	0.980799	1.14105	0.038607	1.45778	0.1449	4	depression
PM25_mean_cat_3	0.0379628	-0.0652299	0.141155	1.03869	0.936852	1.1516	0.0526503	0.721036	0.470887	4	depression
PM25_mean_cat_4	0.0781013	-0.046889	0.203092	1.08123	0.954193	1.22518	0.0637718	1.2247	0.220688	4	depression
PM25_mean_cat_5	0.10632	-0.0361691	0.248808	1.11218	0.964477	1.2825	0.0726997	1.46245	0.143618	4	depression
PM25_mean_cat_6	0.106657	-0.0519547	0.265269	1.11255	0.949372	1.30378	0.0809259	1.31796	0.187517	4	depression
PM25_mean_cat_7	0.126511	-0.0507381	0.30376	1.13486	0.950528	1.35494	0.0904349	1.39892	0.161837	4	depression
SEASALT_mean_cat_2	-0.0358092	-0.0783896	0.00677112	0.964824	0.924604	1.00679	0.0217251	-1.64829	0.099293	4	depression
SEASALT_mean_cat_3	-0.0710951	-0.122546	-0.0196442	0.931373	0.884665	0.980547	0.0262509	-2.70829	0.0067631	4	depression
SEASALT_mean_cat_4	-0.00196784	-0.058815	0.0548793	0.998034	0.942881	1.05641	0.0290042	-0.0678468	0.945908	4	depression
SEASALT_mean_cat_5	0.018588	-0.0404545	0.0776305	1.01876	0.960353	1.08072	0.0301243	0.617044	0.537206	4	depression
SEASALT_mean_cat_6	0.0579561	-0.00474816	0.12066	1.05967	0.995263	1.12824	0.0319926	1.81155	0.0700558	4	depression
SEASALT_mean_cat_7	0.28388	0.214611	0.353149	1.32827	1.23938	1.42354	0.0353418	8.03241	9.55759e-16	4	depression
sia_mean_cat_2	-0.0530363	-0.154749	0.048676	0.948346	0.856631	1.04988	0.051895	-1.02199	0.306784	4	depression
sia_mean_cat_3	-0.0580587	-0.192038	0.0759209	0.943595	0.825275	1.07888	0.0683582	-0.84933	0.395697	4	depression
sia_mean_cat_4	-0.142413	-0.297511	0.0126852	0.867263	0.742665	1.01277	0.079133	-1.79966	0.0719141	4	depression
sia_mean_cat_5	-0.183585	-0.356524	-0.0106463	0.832281	0.700105	0.98941	0.0882358	-2.08062	0.0374685	4	depression
sia_mean_cat_6	-0.171276	-0.359556	0.0170026	0.842589	0.697987	1.01715	0.0960625	-1.78297	0.0745914	4	depression
sia_mean_cat_7	-0.185779	-0.389981	0.0184237	0.830458	0.67707	1.01859	0.104187	-1.78313	0.0745651	4	depression
SO2_mean_cat_2	0.167637	0.0942079	0.241067	1.18251	1.09879	1.27261	0.0374647	4.47454	7.65751e-06	4	depression
SO2_mean_cat_3	0.140506	0.0453689	0.235643	1.15086	1.04641	1.26572	0.0485402	2.89463	0.00379606	4	depression
SO2_mean_cat_4	0.0435606	-0.070645	0.157766	1.04452	0.931793	1.17089	0.0582692	0.747574	0.454717	4	depression
SO2_mean_cat_5	-0.0557159	-0.185761	0.0743295	0.945808	0.830472	1.07716	0.0663509	-0.839715	0.401068	4	depression
SO2_mean_cat_6	-0.0977814	-0.241823	0.0462606	0.906847	0.785195	1.04735	0.0734922	-1.3305	0.183353	4	depression
SO2_mean_cat_7	-0.105958	-0.265836	0.0539207	0.899463	0.766565	1.0554	0.0815721	-1.29895	0.193963	4	depression
SO4_mean_cat_2	0.126065	0.0216281	0.230502	1.13436	1.02186	1.25923	0.0532852	2.36586	0.0179884	4	depression
SO4_mean_cat_3	0.0670976	-0.0752944	0.20949	1.0694	0.92747	1.23305	0.0726503	0.92357	0.35571	4	depression
SO4_mean_cat_4	0.185554	0.0181663	0.352942	1.20389	1.01833	1.42325	0.0854035	2.17267	0.0298048	4	depression
SO4_mean_cat_5	0.245248	0.0595499	0.430946	1.27794	1.06136	1.53871	0.0947457	2.58849	0.00963984	4	depression
SO4_mean_cat_6	0.238151	0.038448	0.437854	1.2689	1.0392	1.54938	0.101891	2.33731	0.0194232	4	depression
SO4_mean_cat_7	0.22971	0.0166801	0.44274	1.25824	1.01682	1.55697	0.108691	2.11343	0.0345642	4	depression
CO_mean_cat_2	-0.174792	-0.258932	-0.0906509	0.839632	0.771875	0.913336	0.0429297	-4.07158	4.66954e-05	0	personality
CO_mean_cat_3	-0.269434	-0.368315	-0.170554	0.763811	0.691899	0.843198	0.0504501	-5.34061	9.26319e-08	0	personality
CO_mean_cat_4	-0.36697	-0.479146	-0.254793	0.692831	0.619312	0.775077	0.057234	-6.41174	1.4387e-10	0	personality
CO_mean_cat_5	-0.37203	-0.494889	-0.249171	0.689334	0.609639	0.779447	0.0626843	-5.93498	2.9389e-09	0	personality
CO_mean_cat_6	-0.393158	-0.530097	-0.256219	0.674922	0.588548	0.773972	0.069868	-5.62716	1.83202e-08	0	personality
CO_mean_cat_7	-0.464041	-0.62032	-0.307762	0.628738	0.537772	0.73509	0.0797358	-5.81973	5.89412e-09	0	personality
EC_mean_cat_2	0.242145	0.16606	0.31823	1.27398	1.18064	1.37469	0.0388196	6.2377	4.44059e-10	0	personality
EC_mean_cat_3	0.352787	0.254547	0.451027	1.42303	1.28988	1.56992	0.0501235	7.03835	1.94527e-12	0	personality
EC_mean_cat_4	0.343184	0.227092	0.459277	1.40943	1.25494	1.58293	0.0592321	5.79389	6.87752e-09	0	personality
EC_mean_cat_5	0.291929	0.155005	0.428853	1.33901	1.16766	1.5355	0.0698605	4.17874	2.93123e-05	0	personality
EC_mean_cat_6	0.393861	0.232915	0.554806	1.48269	1.26227	1.7416	0.0821164	4.79637	1.61568e-06	0	personality
EC_mean_cat_7	0.48337	0.293144	0.673597	1.62153	1.34064	1.96128	0.0970561	4.98032	6.34805e-07	0	personality
NH4_mean_cat_2	-0.0805514	-0.235007	0.0739041	0.922608	0.790565	1.0767	0.0788053	-1.02216	0.306707	0	personality
NH4_mean_cat_3	-0.272702	-0.451188	-0.0942164	0.76132	0.636871	0.910086	0.0910658	-2.99456	0.00274841	0	personality
NH4_mean_cat_4	-0.400548	-0.592384	-0.208711	0.669953	0.553007	0.81163	0.0978776	-4.09233	4.27057e-05	0	personality
NH4_mean_cat_5	-0.421276	-0.623592	-0.21896	0.656209	0.536016	0.803354	0.103224	-4.08117	4.48105e-05	0	personality
NH4_mean_cat_6	-0.358322	-0.569988	-0.146657	0.698848	0.565532	0.86359	0.107995	-3.31796	0.000906762	0	personality
NH4_mean_cat_7	-0.367008	-0.58813	-0.145886	0.692804	0.555365	0.864256	0.112819	-3.25306	0.00114171	0	personality
NO2_mean_cat_2	0.155862	-0.00274787	0.314473	1.16867	0.997256	1.36954	0.0809251	1.92601	0.0541033	0	personality
NO2_mean_cat_3	0.364711	0.180793	0.54863	1.4401	1.19817	1.73088	0.0938376	3.88662	0.000101649	0	personality
NO2_mean_cat_4	0.545621	0.345589	0.745653	1.72568	1.41282	2.10782	0.102059	5.34613	8.98533e-08	0	personality
NO2_mean_cat_5	0.660001	0.444068	0.875934	1.93479	1.55904	2.40112	0.110172	5.99065	2.09005e-09	0	personality
NO2_mean_cat_6	0.621086	0.389048	0.853125	1.86095	1.47558	2.34697	0.118389	5.24614	1.55315e-07	0	personality
NO2_mean_cat_7	0.654772	0.409121	0.900422	1.9247	1.50549	2.46064	0.125334	5.22421	1.74898e-07	0	personality
NO3_mean_cat_2	0.0720506	-0.0144029	0.158504	1.07471	0.9857	1.17176	0.0441097	1.63344	0.102377	0	personality
NO3_mean_cat_3	0.15681	0.0653031	0.248316	1.16977	1.06748	1.28187	0.0466879	3.35868	0.000783154	0	personality
NO3_mean_cat_4	0.25912	0.163016	0.355223	1.29579	1.17706	1.4265	0.0490333	5.28456	1.26008e-07	0	personality
NO3_mean_cat_5	0.394054	0.292923	0.495184	1.48298	1.34034	1.6408	0.0515982	7.63698	2.22384e-14	0	personality
NO3_mean_cat_6	0.500333	0.394067	0.6066	1.64927	1.483	1.83418	0.0542186	9.22808	2.7552e-20	0	personality
NO3_mean_cat_7	0.616145	0.5035	0.728791	1.85178	1.6545	2.07257	0.0574734	10.7205	8.1526e-27	0	personality
NOX_mean_cat_2	0.0204205	-0.135472	0.176313	1.02063	0.873303	1.19281	0.0795386	0.256737	0.797382	0	personality
NOX_mean_cat_3	0.00278775	-0.173458	0.179033	1.00279	0.840753	1.19606	0.0899229	0.0310016	0.975268	0	personality
NOX_mean_cat_4	0.0645574	-0.125032	0.254147	1.06669	0.882469	1.28936	0.0967309	0.667391	0.504522	0	personality
NOX_mean_cat_5	0.155552	-0.0463435	0.357447	1.1683	0.954714	1.42968	0.10301	1.51007	0.131026	0	personality
NOX_mean_cat_6	0.277723	0.065464	0.489983	1.32012	1.06765	1.63229	0.108298	2.56445	0.0103341	0	personality
NOX_mean_cat_7	0.330012	0.111651	0.548373	1.39099	1.11812	1.73044	0.111411	2.96213	0.00305523	0	personality
O3_mean_cat_2	-0.0450158	-0.112673	0.0226414	0.955982	0.893443	1.0229	0.0345196	-1.30407	0.192211	0	personality
O3_mean_cat_3	-0.0298064	-0.123416	0.063803	0.970633	0.883896	1.06588	0.0477608	-0.624077	0.532577	0	personality
O3_mean_cat_4	0.0430907	-0.0677039	0.153885	1.04403	0.934537	1.16636	0.0565289	0.762278	0.445894	0	personality
O3_mean_cat_5	0.17176	0.0476854	0.295835	1.18739	1.04884	1.34425	0.0633046	2.71323	0.00666304	0	personality
O3_mean_cat_6	0.302006	0.164047	0.439965	1.35257	1.17827	1.55265	0.0703886	4.29055	1.78231e-05	0	personality
O3_mean_cat_7	0.407777	0.250949	0.564606	1.50347	1.28524	1.75875	0.080016	5.09619	3.46549e-07	0	personality
OC_mean_cat_2	-0.0104917	-0.0769365	0.055953	0.989563	0.925949	1.05755	0.033901	-0.309481	0.756955	0	personality
OC_mean_cat_3	0.0944334	0.0115182	0.177349	1.09904	1.01158	1.19405	0.0423045	2.23223	0.0255996	0	personality
OC_mean_cat_4	0.0308492	-0.0677606	0.129459	1.03133	0.934484	1.13821	0.050312	0.613158	0.539772	0	personality
OC_mean_cat_5	0.0136846	-0.105379	0.132749	1.01378	0.899983	1.14196	0.060748	0.225268	0.821771	0	personality
OC_mean_cat_6	-0.140006	-0.281984	0.00197234	0.869353	0.754285	1.00197	0.0724393	-1.93274	0.0532687	0	personality
OC_mean_cat_7	-0.176152	-0.347868	-0.00443729	0.83849	0.706192	0.995573	0.0876114	-2.01061	0.0443665	0	personality
PM10_mean_cat_2	-0.0949959	-0.206215	0.0162232	0.909377	0.813658	1.01636	0.0567455	-1.67407	0.0941169	0	personality
PM10_mean_cat_3	-0.154418	-0.287117	-0.021719	0.856914	0.750424	0.978515	0.0677049	-2.28075	0.0225631	0	personality
PM10_mean_cat_4	-0.160183	-0.308691	-0.0116742	0.851988	0.734407	0.988394	0.0757711	-2.11404	0.0345122	0	personality
PM10_mean_cat_5	-0.148006	-0.31124	0.0152278	0.862426	0.732538	1.01534	0.0832841	-1.77712	0.0755481	0	personality
PM10_mean_cat_6	-0.143717	-0.321446	0.0340128	0.866133	0.7251	1.0346	0.09068	-1.58488	0.112994	0	personality
PM10_mean_cat_7	-0.195664	-0.388035	-0.00329384	0.822288	0.678389	0.996712	0.09815	-1.99352	0.0462042	0	personality
PM25_mean_cat_2	0.0484779	-0.0765798	0.173536	1.04967	0.926279	1.1895	0.0638061	0.759769	0.447393	0	personality
PM25_mean_cat_3	0.0127821	-0.144738	0.170302	1.01286	0.865249	1.18566	0.0803687	0.159043	0.873635	0	personality
PM25_mean_cat_4	0.00889281	-0.173524	0.19131	1.00893	0.840697	1.21083	0.0930716	0.0955481	0.923879	0	personality
PM25_mean_cat_5	-0.0614499	-0.262536	0.139636	0.9404	0.769099	1.14986	0.102597	-0.598946	0.549209	0	personality
PM25_mean_cat_6	-0.0991269	-0.315804	0.117551	0.905628	0.729202	1.12474	0.110552	-0.896656	0.369902	0	personality
PM25_mean_cat_7	-0.0964687	-0.329095	0.136157	0.908038	0.719575	1.14586	0.118689	-0.812786	0.416341	0	personality
SEASALT_mean_cat_2	0.0932286	0.0453207	0.141136	1.09771	1.04636	1.15158	0.0244432	3.81408	0.000136689	0	personality
SEASALT_mean_cat_3	0.0525782	-0.00238732	0.107544	1.05399	0.997616	1.11354	0.0280442	1.87484	0.0608152	0	personality
SEASALT_mean_cat_4	-0.109287	-0.169369	-0.0492059	0.896473	0.844197	0.951985	0.0306545	-3.56514	0.000363659	0	personality
SEASALT_mean_cat_5	-0.176375	-0.239889	-0.112862	0.838303	0.786716	0.893274	0.0324054	-5.44278	5.24567e-08	0	personality
SEASALT_mean_cat_6	-0.0973926	-0.164487	-0.0302986	0.9072	0.848329	0.970156	0.0342323	-2.84505	0.00444042	0	personality
SEASALT_mean_cat_7	-0.0737251	-0.149987	0.00253682	0.928927	0.860719	1.00254	0.0389099	-1.89477	0.0581233	0	personality
sia_mean_cat_2	0.307855	0.109742	0.505968	1.3605	1.11599	1.65859	0.10108	3.04566	0.00232173	0	personality
sia_mean_cat_3	0.470159	0.238162	0.702156	1.60025	1.26891	2.0181	0.118368	3.97201	7.12688e-05	0	personality
sia_mean_cat_4	0.525084	0.275061	0.775106	1.6906	1.31661	2.17082	0.127565	4.11621	3.85156e-05	0	personality
sia_mean_cat_5	0.520099	0.256438	0.78376	1.68219	1.29232	2.18969	0.134523	3.86624	0.000110527	0	personality
sia_mean_cat_6	0.449456	0.17439	0.724521	1.56746	1.19052	2.06374	0.140342	3.20257	0.00136207	0	personality
sia_mean_cat_7	0.415469	0.128848	0.70209	1.51508	1.13752	2.01796	0.146238	2.84105	0.00449654	0	personality
SO2_mean_cat_2	0.650588	0.512821	0.788355	1.91667	1.67	2.19977	0.0702906	9.25569	2.12853e-20	0	personality
SO2_mean_cat_3	0.608506	0.448065	0.768947	1.83768	1.56528	2.15749	0.0818592	7.43357	1.05701e-13	0	personality
SO2_mean_cat_4	0.556515	0.378854	0.734176	1.74458	1.46061	2.08376	0.0906449	6.13951	8.27785e-10	0	personality
SO2_mean_cat_5	0.526882	0.335409	0.718356	1.69364	1.39851	2.05106	0.0976924	5.39328	6.91821e-08	0	personality
SO2_mean_cat_6	0.457291	0.253981	0.660601	1.57979	1.28915	1.93596	0.103732	4.4084	1.04135e-05	0	personality
SO2_mean_cat_7	0.41364	0.197897	0.629382	1.51231	1.21884	1.87645	0.110075	3.75781	0.000171407	0	personality
SO4_mean_cat_2	0.0693896	-0.118771	0.25755	1.07185	0.888011	1.29376	0.0960019	0.722794	0.469807	0	personality
SO4_mean_cat_3	-0.151251	-0.366519	0.0640174	0.859632	0.693143	1.06611	0.109833	-1.3771	0.168481	0	personality
SO4_mean_cat_4	-0.023766	-0.255857	0.208325	0.976514	0.774253	1.23161	0.118416	-0.2007	0.840933	0	personality
SO4_mean_cat_5	0.0241059	-0.221919	0.270131	1.0244	0.80098	1.31014	0.125525	0.19204	0.847711	0	personality
SO4_mean_cat_6	0.0329952	-0.226164	0.292154	1.03355	0.797587	1.33931	0.132226	0.249536	0.802946	0	personality
SO4_mean_cat_7	-0.130138	-0.401222	0.140946	0.877974	0.669501	1.15136	0.138311	-0.940909	0.346751	0	personality
CO_mean_cat_2	-0.110088	-0.194955	-0.0252209	0.895755	0.822872	0.975094	0.0433003	-2.54243	0.0110085	1	personality
CO_mean_cat_3	-0.173582	-0.273851	-0.0733131	0.840648	0.760446	0.92931	0.0511585	-3.39302	0.000691263	1	personality
CO_mean_cat_4	-0.248318	-0.362444	-0.134192	0.780112	0.695973	0.874422	0.0582285	-4.26455	2.00306e-05	1	personality
CO_mean_cat_5	-0.219657	-0.34522	-0.0940926	0.802795	0.708064	0.910198	0.0640644	-3.42868	0.000606516	1	personality
CO_mean_cat_6	-0.206567	-0.346901	-0.0662334	0.813372	0.706876	0.935912	0.0716001	-2.88501	0.00391401	1	personality
CO_mean_cat_7	-0.246179	-0.406569	-0.0857896	0.781782	0.665931	0.917787	0.081833	-3.00831	0.00262702	1	personality
EC_mean_cat_2	0.197685	0.121265	0.274105	1.21858	1.12892	1.31535	0.0389904	5.0701	3.97613e-07	1	personality
EC_mean_cat_3	0.298179	0.199227	0.397131	1.3474	1.22046	1.48755	0.0504867	5.90608	3.50337e-09	1	personality
EC_mean_cat_4	0.288015	0.171114	0.404916	1.33378	1.18663	1.49918	0.0596445	4.82886	1.37316e-06	1	personality
EC_mean_cat_5	0.234295	0.096491	0.372099	1.26402	1.1013	1.45078	0.0703094	3.33234	0.000861186	1	personality
EC_mean_cat_6	0.329375	0.167674	0.491076	1.3901	1.18255	1.63407	0.0825019	3.99233	6.5426e-05	1	personality
EC_mean_cat_7	0.420062	0.229169	0.610956	1.52206	1.25755	1.84219	0.0973966	4.31291	1.61123e-05	1	personality
NH4_mean_cat_2	0.0447972	-0.111481	0.201076	1.04582	0.894508	1.22272	0.0797354	0.561823	0.574237	1	personality
NH4_mean_cat_3	-0.0750687	-0.257143	0.107006	0.92768	0.773257	1.11294	0.0928969	-0.808086	0.419041	1	personality
NH4_mean_cat_4	-0.155552	-0.352179	0.0410752	0.855943	0.703154	1.04193	0.100322	-1.55053	0.121015	1	personality
NH4_mean_cat_5	-0.130965	-0.339486	0.0775556	0.877248	0.712136	1.08064	0.10639	-1.23099	0.218327	1	personality
NH4_mean_cat_6	-0.0199967	-0.239456	0.199463	0.980202	0.787056	1.22075	0.111971	-0.178588	0.858261	1	personality
NH4_mean_cat_7	0.00463356	-0.224957	0.234224	1.00464	0.798551	1.26393	0.11714	0.0395557	0.968447	1	personality
NO2_mean_cat_2	0.127932	-0.0300638	0.285927	1.13648	0.970384	1.331	0.0806114	1.58702	0.112509	1	personality
NO2_mean_cat_3	0.317222	0.13372	0.500724	1.37331	1.14307	1.64992	0.0936252	3.38821	0.000703495	1	personality
NO2_mean_cat_4	0.476573	0.276726	0.676421	1.61055	1.3188	1.96683	0.101965	4.67389	2.95541e-06	1	personality
NO2_mean_cat_5	0.570856	0.354899	0.786814	1.76978	1.42604	2.19639	0.110184	5.18092	2.20793e-07	1	personality
NO2_mean_cat_6	0.509869	0.277521	0.742217	1.66507	1.31985	2.10059	0.118547	4.30098	1.70042e-05	1	personality
NO2_mean_cat_7	0.537028	0.290976	0.783081	1.71092	1.33773	2.1882	0.125539	4.27777	1.88776e-05	1	personality
NO3_mean_cat_2	-0.0519233	-0.140856	0.0370098	0.949402	0.868614	1.0377	0.0453749	-1.14432	0.252492	1	personality
NO3_mean_cat_3	-0.0318497	-0.12959	0.0658904	0.968652	0.878456	1.06811	0.0498683	-0.638676	0.523034	1	personality
NO3_mean_cat_4	0.0189329	-0.0871849	0.125051	1.01911	0.916508	1.13321	0.0541427	0.349686	0.726575	1	personality
NO3_mean_cat_5	0.107798	-0.0076457	0.223241	1.11382	0.992383	1.25012	0.0589007	1.83016	0.0672264	1	personality
NO3_mean_cat_6	0.157286	0.0315354	0.283036	1.17033	1.03204	1.32715	0.0641595	2.45148	0.014227	1	personality
NO3_mean_cat_7	0.192761	0.0536221	0.331901	1.21259	1.05509	1.39361	0.0709907	2.7153	0.00662152	1	personality
NOX_mean_cat_2	0.0184604	-0.13681	0.173731	1.01863	0.872136	1.18974	0.0792212	0.233023	0.815744	1	personality
NOX_mean_cat_3	-4.04129e-05	-0.175803	0.175722	0.99996	0.838783	1.19211	0.0896764	-0.000450652	0.99964	1	personality
NOX_mean_cat_4	0.062402	-0.126808	0.251612	1.06439	0.880903	1.2861	0.0965376	0.646401	0.51802	1	personality
NOX_mean_cat_5	0.162453	-0.0391115	0.364017	1.17639	0.961643	1.4391	0.102841	1.57965	0.114186	1	personality
NOX_mean_cat_6	0.291124	0.0791688	0.503078	1.33793	1.08239	1.6538	0.108142	2.69204	0.00710154	1	personality
NOX_mean_cat_7	0.349865	0.131799	0.567932	1.41888	1.14088	1.76461	0.11126	3.14456	0.00166335	1	personality
O3_mean_cat_2	-0.0327801	-0.100507	0.0349467	0.967751	0.904379	1.03556	0.0345551	-0.948633	0.342807	1	personality
O3_mean_cat_3	-0.0118922	-0.105702	0.0819176	0.988178	0.899693	1.08537	0.047863	-0.248464	0.803776	1	personality
O3_mean_cat_4	0.0661148	-0.0449686	0.177198	1.06835	0.956028	1.19387	0.0566763	1.16653	0.243398	1	personality
O3_mean_cat_5	0.192305	0.0678446	0.316766	1.21204	1.0702	1.37268	0.0635015	3.02836	0.00245887	1	personality
O3_mean_cat_6	0.313562	0.175086	0.452038	1.36829	1.19135	1.57151	0.0706521	4.43811	9.07526e-06	1	personality
O3_mean_cat_7	0.412881	0.255561	0.5702	1.51116	1.29119	1.76862	0.0802664	5.14388	2.69124e-07	1	personality
OC_mean_cat_2	-0.032314	-0.0987669	0.0341389	0.968203	0.905954	1.03473	0.0339052	-0.953071	0.340554	1	personality
OC_mean_cat_3	0.0612975	-0.0216677	0.144263	1.06322	0.978565	1.15519	0.0423299	1.44809	0.147592	1	personality
OC_mean_cat_4	-0.00912582	-0.10792	0.0896688	0.990916	0.897699	1.09381	0.0504063	-0.181045	0.856332	1	personality
OC_mean_cat_5	-0.052812	-0.172292	0.0666678	0.948558	0.841734	1.06894	0.0609602	-0.866335	0.386306	1	personality
OC_mean_cat_6	-0.236585	-0.37917	-0.0940005	0.789319	0.684429	0.910282	0.0727486	-3.25209	0.00114559	1	personality
OC_mean_cat_7	-0.294949	-0.467157	-0.122741	0.744569	0.626781	0.884493	0.0878629	-3.35692	0.000788148	1	personality
PM10_mean_cat_2	-0.00841178	-0.122018	0.105194	0.991623	0.885132	1.11093	0.0579634	-0.145122	0.884614	1	personality
PM10_mean_cat_3	-0.0415773	-0.177564	0.0944091	0.959275	0.837308	1.09901	0.0693821	-0.599251	0.549006	1	personality
PM10_mean_cat_4	-0.0381611	-0.190308	0.113986	0.962558	0.826704	1.12074	0.0776275	-0.491592	0.623008	1	personality
PM10_mean_cat_5	-0.012757	-0.179598	0.154084	0.987324	0.835606	1.16659	0.0851247	-0.149863	0.880873	1	personality
PM10_mean_cat_6	0.0218899	-0.159516	0.203296	1.02213	0.852556	1.22544	0.0925559	0.236504	0.813041	1	personality
PM10_mean_cat_7	0.0364032	-0.160471	0.233277	1.03707	0.851743	1.26273	0.100448	0.362409	0.717046	1	personality
PM25_mean_cat_2	-0.0472102	-0.173782	0.0793617	0.953887	0.84048	1.0826	0.0645787	-0.731049	0.464749	1	personality
PM25_mean_cat_3	-0.097054	-0.257614	0.0635058	0.907507	0.772894	1.06557	0.0819198	-1.18474	0.236119	1	personality
PM25_mean_cat_4	-0.0868235	-0.272341	0.0986943	0.916839	0.761594	1.10373	0.0946537	-0.917275	0.358998	1	personality
PM25_mean_cat_5	-0.140473	-0.343261	0.0623161	0.868948	0.709453	1.0643	0.103465	-1.35768	0.174567	1	personality
PM25_mean_cat_6	-0.180647	-0.397782	0.0364878	0.83473	0.671809	1.03716	0.110785	-1.63061	0.102973	1	personality
PM25_mean_cat_7	-0.186909	-0.42014	0.0463221	0.829519	0.656955	1.04741	0.118998	-1.5707	0.116253	1	personality
SEASALT_mean_cat_2	0.093319	0.0449695	0.141669	1.09781	1.046	1.15219	0.0246686	3.78291	0.000155006	1	personality
SEASALT_mean_cat_3	0.0606357	0.00471275	0.116559	1.06251	1.00472	1.12362	0.0285326	2.12513	0.0335754	1	personality
SEASALT_mean_cat_4	-0.083251	-0.144345	-0.0221567	0.92012	0.865589	0.978087	0.0311711	-2.67077	0.00756768	1	personality
SEASALT_mean_cat_5	-0.145437	-0.210329	-0.0805453	0.864644	0.810317	0.922613	0.0331087	-4.39272	1.11944e-05	1	personality
SEASALT_mean_cat_6	-0.0703226	-0.138637	-0.00200832	0.932093	0.870544	0.997994	0.0348549	-2.01758	0.0436346	1	personality
SEASALT_mean_cat_7	-0.0503888	-0.127817	0.0270398	0.95086	0.880014	1.02741	0.0395051	-1.2755	0.202132	1	personality
sia_mean_cat_2	0.384949	0.187278	0.582621	1.46954	1.20596	1.79072	0.100855	3.81688	0.000135152	1	personality
sia_mean_cat_3	0.626424	0.393522	0.859327	1.87091	1.48219	2.36157	0.11883	5.2716	1.35239e-07	1	personality
sia_mean_cat_4	0.751788	0.498798	1.00478	2.12079	1.64674	2.7313	0.129079	5.82425	5.73682e-09	1	personality
sia_mean_cat_5	0.804711	0.535979	1.07344	2.23605	1.70912	2.92543	0.13711	5.86907	4.38241e-09	1	personality
sia_mean_cat_6	0.779863	0.498044	1.06168	2.18117	1.6455	2.89123	0.143788	5.42371	5.8375e-08	1	personality
sia_mean_cat_7	0.788662	0.493856	1.08347	2.20045	1.63862	2.95491	0.150414	5.24327	1.57755e-07	1	personality
SO2_mean_cat_2	0.701086	0.563575	0.838596	2.01594	1.75694	2.31312	0.0701599	9.99268	1.64088e-23	1	personality
SO2_mean_cat_3	0.705902	0.545008	0.866797	2.02567	1.72462	2.37928	0.0820904	8.59908	8.03542e-18	1	personality
SO2_mean_cat_4	0.688257	0.50902	0.867494	1.99024	1.66366	2.38094	0.091449	7.52613	5.22652e-14	1	personality
SO2_mean_cat_5	0.688999	0.495061	0.882937	1.99172	1.6406	2.41799	0.0989497	6.96312	3.32819e-12	1	personality
SO2_mean_cat_6	0.651066	0.444338	0.857794	1.91758	1.55946	2.35795	0.105475	6.17269	6.71376e-10	1	personality
SO2_mean_cat_7	0.659196	0.438477	0.879916	1.93324	1.55034	2.4107	0.112614	5.85359	4.8107e-09	1	personality
SO4_mean_cat_2	0.596913	0.365051	0.828776	1.8165	1.44059	2.29051	0.118299	5.04579	4.51657e-07	1	personality
SO4_mean_cat_3	0.632628	0.354624	0.910631	1.88255	1.42564	2.48589	0.141841	4.46011	8.19162e-06	1	personality
SO4_mean_cat_4	0.858792	0.562967	1.15462	2.36031	1.75587	3.17281	0.150934	5.68986	1.27145e-08	1	personality
SO4_mean_cat_5	0.945162	0.636031	1.25429	2.57323	1.88897	3.50536	0.157723	5.99254	2.06585e-09	1	personality
SO4_mean_cat_6	0.994757	0.673929	1.31558	2.70407	1.96193	3.72693	0.163691	6.07705	1.22413e-09	1	personality
SO4_mean_cat_7	0.949346	0.617791	1.2809	2.58402	1.85483	3.59988	0.169164	5.612	2.00003e-08	1	personality
CO_mean_cat_2	-0.111151	-0.196091	-0.0262115	0.894803	0.821937	0.974129	0.0433374	-2.56479	0.0103239	2	personality
CO_mean_cat_3	-0.175374	-0.275701	-0.0750475	0.839143	0.75904	0.927699	0.0511879	-3.42608	0.000612356	2	personality
CO_mean_cat_4	-0.248086	-0.362255	-0.133917	0.780293	0.696105	0.874663	0.0582506	-4.25895	2.05391e-05	2	personality
CO_mean_cat_5	-0.220218	-0.345854	-0.0945819	0.802344	0.707616	0.909753	0.0641012	-3.43547	0.00059152	2	personality
CO_mean_cat_6	-0.206665	-0.347075	-0.0662547	0.813292	0.706752	0.935892	0.0716392	-2.8848	0.00391658	2	personality
CO_mean_cat_7	-0.250342	-0.410792	-0.0898913	0.778535	0.663125	0.914031	0.0818639	-3.05802	0.00222804	2	personality
EC_mean_cat_2	0.197173	0.120785	0.273562	1.21796	1.12838	1.31464	0.0389744	5.05904	4.21362e-07	2	personality
EC_mean_cat_3	0.29656	0.197655	0.395465	1.34522	1.21854	1.48508	0.0504627	5.87682	4.18227e-09	2	personality
EC_mean_cat_4	0.285629	0.168762	0.402495	1.3306	1.18384	1.49555	0.0596268	4.79027	1.66555e-06	2	personality
EC_mean_cat_5	0.232994	0.0952191	0.370769	1.26237	1.0999	1.44885	0.0702947	3.31454	0.000917956	2	personality
EC_mean_cat_6	0.331978	0.17028	0.493677	1.39372	1.18564	1.63833	0.0825008	4.02394	5.72322e-05	2	personality
EC_mean_cat_7	0.429729	0.238811	0.620648	1.53684	1.26974	1.86013	0.0974093	4.41159	1.02616e-05	2	personality
NH4_mean_cat_2	0.050568	-0.105525	0.206661	1.05187	0.899852	1.22957	0.0796409	0.634949	0.525461	2	personality
NH4_mean_cat_3	-0.0660568	-0.247933	0.115819	0.936078	0.780412	1.12279	0.0927957	-0.711852	0.476556	2	personality
NH4_mean_cat_4	-0.145275	-0.34172	0.0511697	0.864784	0.710547	1.0525	0.100229	-1.44943	0.147216	2	personality
NH4_mean_cat_5	-0.119534	-0.327884	0.0888165	0.887334	0.720446	1.09288	0.106303	-1.12446	0.260817	2	personality
NH4_mean_cat_6	-0.00637083	-0.225653	0.212911	0.993649	0.797995	1.23727	0.111881	-0.0569431	0.954591	2	personality
NH4_mean_cat_7	0.0153589	-0.214063	0.244781	1.01548	0.807298	1.27734	0.117054	0.131212	0.895608	2	personality
NO2_mean_cat_2	0.124906	-0.0331661	0.282978	1.13304	0.967378	1.32708	0.0806505	1.54873	0.121446	2	personality
NO2_mean_cat_3	0.323213	0.139536	0.506891	1.38156	1.14974	1.66012	0.0937146	3.44891	0.000562848	2	personality
NO2_mean_cat_4	0.473645	0.273574	0.673716	1.60584	1.31466	1.96151	0.102079	4.63999	3.48421e-06	2	personality
NO2_mean_cat_5	0.567041	0.350848	0.783234	1.76304	1.42027	2.18854	0.110305	5.14068	2.7374e-07	2	personality
NO2_mean_cat_6	0.510155	0.277628	0.742683	1.66555	1.31999	2.10157	0.118639	4.30007	1.70742e-05	2	personality
NO2_mean_cat_7	0.541814	0.295561	0.788066	1.71912	1.34388	2.19914	0.125641	4.31239	1.61501e-05	2	personality
NO3_mean_cat_2	-0.0522659	-0.141213	0.0366816	0.949077	0.868304	1.03736	0.0453822	-1.15168	0.249452	2	personality
NO3_mean_cat_3	-0.036402	-0.13415	0.0613461	0.964253	0.874459	1.06327	0.0498724	-0.729902	0.46545	2	personality
NO3_mean_cat_4	0.0177743	-0.0883553	0.123904	1.01793	0.915436	1.13191	0.0541487	0.328249	0.742723	2	personality
NO3_mean_cat_5	0.105699	-0.00974217	0.221139	1.11149	0.990305	1.2475	0.0588994	1.79456	0.0727238	2	personality
NO3_mean_cat_6	0.155637	0.0299032	0.281371	1.1684	1.03035	1.32495	0.0641511	2.4261	0.015262	2	personality
NO3_mean_cat_7	0.193067	0.0539417	0.332192	1.21296	1.05542	1.39402	0.0709836	2.71988	0.00653052	2	personality
NOX_mean_cat_2	0.0196384	-0.1357	0.174977	1.01983	0.873105	1.19122	0.0792556	0.247785	0.804301	2	personality
NOX_mean_cat_3	-0.00357339	-0.179463	0.172316	0.996433	0.835719	1.18805	0.0897413	-0.0398188	0.968238	2	personality
NOX_mean_cat_4	0.0639166	-0.125419	0.253252	1.066	0.882127	1.28821	0.0966017	0.661651	0.508195	2	personality
NOX_mean_cat_5	0.164166	-0.03754	0.365872	1.17841	0.963156	1.44177	0.102913	1.59519	0.11067	2	personality
NOX_mean_cat_6	0.288998	0.0769209	0.501076	1.33509	1.07996	1.6505	0.108205	2.67085	0.00756602	2	personality
NOX_mean_cat_7	0.34509	0.126908	0.563271	1.41212	1.13531	1.75641	0.111319	3.1	0.00193519	2	personality
O3_mean_cat_2	-0.0319568	-0.099746	0.0358325	0.968548	0.905067	1.03648	0.034587	-0.923954	0.35551	2	personality
O3_mean_cat_3	-0.011583	-0.105373	0.0822067	0.988484	0.899989	1.08568	0.0478528	-0.242055	0.808738	2	personality
O3_mean_cat_4	0.0649543	-0.0461276	0.176036	1.06711	0.95492	1.19248	0.0566755	1.14607	0.251764	2	personality
O3_mean_cat_5	0.189882	0.0654212	0.314342	1.20911	1.06761	1.36936	0.0635014	2.9902	0.00278797	2	personality
O3_mean_cat_6	0.312268	0.173771	0.450765	1.36652	1.18978	1.56951	0.070663	4.41912	9.91029e-06	2	personality
O3_mean_cat_7	0.412129	0.254764	0.569493	1.51003	1.29016	1.76737	0.0802895	5.13303	2.85111e-07	2	personality
OC_mean_cat_2	-0.0367506	-0.10317	0.0296688	0.963917	0.901974	1.03011	0.0338881	-1.08447	0.278157	2	personality
OC_mean_cat_3	0.055931	-0.0270223	0.138884	1.05752	0.97334	1.14899	0.0423239	1.3215	0.186335	2	personality
OC_mean_cat_4	-0.0117622	-0.11056	0.0870353	0.988307	0.895333	1.09094	0.0504078	-0.23334	0.815497	2	personality
OC_mean_cat_5	-0.055778	-0.175276	0.0637202	0.945749	0.839225	1.06579	0.0609696	-0.91485	0.360271	2	personality
OC_mean_cat_6	-0.242965	-0.385598	-0.100333	0.784299	0.680044	0.904536	0.0727728	-3.33868	0.00084177	2	personality
OC_mean_cat_7	-0.305782	-0.478068	-0.133496	0.736547	0.61998	0.875031	0.0879026	-3.47865	0.000503945	2	personality
PM10_mean_cat_2	-0.0101794	-0.123714	0.103356	0.989872	0.883632	1.10889	0.0579271	-0.175727	0.860508	2	personality
PM10_mean_cat_3	-0.0452176	-0.181181	0.0907456	0.955789	0.834284	1.09499	0.0693703	-0.65183	0.514511	2	personality
PM10_mean_cat_4	-0.0440967	-0.196274	0.108081	0.956861	0.821787	1.11414	0.0776429	-0.567942	0.570074	2	personality
PM10_mean_cat_5	-0.0168173	-0.183701	0.150067	0.983323	0.832184	1.16191	0.0851466	-0.19751	0.843429	2	personality
PM10_mean_cat_6	0.0203636	-0.161071	0.201798	1.02057	0.851231	1.2236	0.0925705	0.219979	0.825887	2	personality
PM10_mean_cat_7	0.0325769	-0.164319	0.229473	1.03311	0.848471	1.25794	0.100459	0.324281	0.745725	2	personality
PM25_mean_cat_2	-0.048461	-0.175071	0.078149	0.952694	0.839397	1.08128	0.0645981	-0.750192	0.453139	2	personality
PM25_mean_cat_3	-0.09371	-0.254306	0.0668865	0.910547	0.775454	1.06917	0.0819385	-1.14366	0.252763	2	personality
PM25_mean_cat_4	-0.080071	-0.265609	0.105467	0.923051	0.766739	1.11123	0.094664	-0.845845	0.397639	2	personality
PM25_mean_cat_5	-0.135446	-0.33828	0.0673887	0.873326	0.712995	1.06971	0.103489	-1.3088	0.190604	2	personality
PM25_mean_cat_6	-0.177557	-0.394725	0.0396103	0.837313	0.673865	1.04041	0.110802	-1.60248	0.10905	2	personality
PM25_mean_cat_7	-0.183833	-0.417112	0.0494459	0.832075	0.658947	1.05069	0.119022	-1.54453	0.12246	2	personality
SEASALT_mean_cat_2	0.0940368	0.045665	0.142409	1.0986	1.04672	1.15305	0.0246799	3.81025	0.000138825	2	personality
SEASALT_mean_cat_3	0.0620429	0.00610897	0.117977	1.06401	1.00613	1.12522	0.0285382	2.17403	0.0297031	2	personality
SEASALT_mean_cat_4	-0.0832754	-0.144403	-0.0221478	0.920098	0.865539	0.978096	0.0311881	-2.6701	0.00758286	2	personality
SEASALT_mean_cat_5	-0.145123	-0.210033	-0.0802138	0.864916	0.810558	0.922919	0.0331177	-4.38205	1.1757e-05	2	personality
SEASALT_mean_cat_6	-0.0697242	-0.138068	-0.00138027	0.932651	0.871039	0.998621	0.03487	-1.99955	0.0455492	2	personality
SEASALT_mean_cat_7	-0.0531982	-0.130649	0.0242531	0.948192	0.877525	1.02455	0.0395167	-1.34622	0.178231	2	personality
sia_mean_cat_2	0.389003	0.191629	0.586378	1.47551	1.21122	1.79747	0.100703	3.86288	0.00011206	2	personality
sia_mean_cat_3	0.628268	0.395628	0.860909	1.87436	1.48532	2.36531	0.118696	5.29308	1.20275e-07	2	personality
sia_mean_cat_4	0.753261	0.500498	1.00602	2.12391	1.64954	2.7347	0.128963	5.84091	5.19156e-09	2	personality
sia_mean_cat_5	0.807299	0.538751	1.07585	2.24184	1.71387	2.93247	0.137016	5.89199	3.81584e-09	2	personality
sia_mean_cat_6	0.779513	0.497891	1.06114	2.18041	1.64525	2.88965	0.143687	5.42506	5.79343e-08	2	personality
sia_mean_cat_7	0.789429	0.494752	1.08411	2.20214	1.64009	2.9568	0.150348	5.25068	1.51543e-07	2	personality
SO2_mean_cat_2	0.700488	0.56294	0.838036	2.01474	1.75583	2.31182	0.0701786	9.9815	1.83666e-23	2	personality
SO2_mean_cat_3	0.702932	0.541976	0.863888	2.01967	1.7194	2.37237	0.0821219	8.55961	1.13246e-17	2	personality
SO2_mean_cat_4	0.685332	0.506074	0.864589	1.98443	1.65877	2.37403	0.0914595	7.49328	6.71745e-14	2	personality
SO2_mean_cat_5	0.684865	0.490899	0.878831	1.9835	1.63378	2.40808	0.098964	6.92035	4.50539e-12	2	personality
SO2_mean_cat_6	0.653829	0.447088	0.860569	1.92289	1.56375	2.36451	0.105482	6.1985	5.7002e-10	2	personality
SO2_mean_cat_7	0.659727	0.439019	0.880435	1.93426	1.55118	2.41195	0.112608	5.85861	4.66757e-09	2	personality
SO4_mean_cat_2	0.594355	0.362564	0.826145	1.81186	1.43701	2.2845	0.118263	5.02572	5.01548e-07	2	personality
SO4_mean_cat_3	0.62951	0.351539	0.907482	1.87669	1.42125	2.47807	0.141825	4.43865	9.05268e-06	2	personality
SO4_mean_cat_4	0.85422	0.558451	1.14999	2.34954	1.74796	3.15816	0.150905	5.66064	1.50811e-08	2	personality
SO4_mean_cat_5	0.939996	0.630927	1.24906	2.55997	1.87935	3.48708	0.157691	5.961	2.50702e-09	2	personality
SO4_mean_cat_6	0.984013	0.66325	1.30478	2.67517	1.94109	3.68687	0.163658	6.01263	1.82542e-09	2	personality
SO4_mean_cat_7	0.94223	0.610713	1.27375	2.5657	1.84174	3.57422	0.169144	5.57057	2.53915e-08	2	personality
CO_mean_cat_2	-0.117762	-0.206545	-0.0289783	0.888908	0.81339	0.971438	0.0452984	-2.59968	0.00933094	3	personality
CO_mean_cat_3	-0.177832	-0.28303	-0.0726337	0.837083	0.753497	0.929941	0.0536736	-3.31321	0.000922309	3	personality
CO_mean_cat_4	-0.255392	-0.375302	-0.135482	0.774613	0.687082	0.873295	0.0611796	-4.17446	2.98692e-05	3	personality
CO_mean_cat_5	-0.224378	-0.356505	-0.0922521	0.799013	0.700119	0.911875	0.0674127	-3.32843	0.000873364	3	personality
CO_mean_cat_6	-0.226953	-0.374897	-0.0790085	0.796958	0.68736	0.924032	0.0754832	-3.00667	0.00264129	3	personality
CO_mean_cat_7	-0.272232	-0.44165	-0.102813	0.761678	0.642974	0.902296	0.0864398	-3.14938	0.00163619	3	personality
EC_mean_cat_2	0.194541	0.11459	0.274491	1.21475	1.12141	1.31586	0.0407918	4.76912	1.85037e-06	3	personality
EC_mean_cat_3	0.278965	0.175174	0.382756	1.32176	1.19145	1.46632	0.0529555	5.26792	1.37981e-07	3	personality
EC_mean_cat_4	0.268573	0.145714	0.391432	1.3081	1.15686	1.4791	0.0626844	4.28452	1.83131e-05	3	personality
EC_mean_cat_5	0.212278	0.0671531	0.357403	1.23649	1.06946	1.42961	0.0740447	2.86689	0.00414525	3	personality
EC_mean_cat_6	0.302792	0.13184	0.473745	1.35363	1.14093	1.606	0.0872224	3.4715	0.000517561	3	personality
EC_mean_cat_7	0.354099	0.150691	0.557507	1.4249	1.16264	1.74631	0.103782	3.41196	0.000644965	3	personality
NH4_mean_cat_2	0.0882087	-0.07663	0.253047	1.09222	0.926233	1.28794	0.0841029	1.04882	0.294262	3	personality
NH4_mean_cat_3	-0.0244821	-0.21633	0.167366	0.975815	0.80547	1.18219	0.0978833	-0.250115	0.802498	3	personality
NH4_mean_cat_4	-0.117967	-0.325192	0.0892571	0.888725	0.722389	1.09336	0.105729	-1.11576	0.264527	3	personality
NH4_mean_cat_5	-0.0858608	-0.305702	0.13398	0.917722	0.736606	1.14337	0.112166	-0.76548	0.443986	3	personality
NH4_mean_cat_6	0.019308	-0.212216	0.250832	1.0195	0.80879	1.28509	0.118127	0.163452	0.870163	3	personality
NH4_mean_cat_7	0.0391449	-0.203272	0.281562	1.03992	0.816056	1.3252	0.123684	0.31649	0.751631	3	personality
NO2_mean_cat_2	0.155882	-0.0094043	0.321167	1.16869	0.99064	1.37874	0.084331	1.84845	0.0645376	3	personality
NO2_mean_cat_3	0.359564	0.167342	0.551785	1.4327	1.18216	1.73635	0.0980738	3.66626	0.000246128	3	personality
NO2_mean_cat_4	0.521201	0.311596	0.730805	1.68405	1.3656	2.07675	0.106943	4.87363	1.09565e-06	3	personality
NO2_mean_cat_5	0.608892	0.382075	0.835708	1.83839	1.46532	2.30645	0.115725	5.26155	1.42848e-07	3	personality
NO2_mean_cat_6	0.582477	0.337964	0.82699	1.79047	1.40209	2.28643	0.124754	4.66901	3.02652e-06	3	personality
NO2_mean_cat_7	0.602318	0.342899	0.861737	1.82635	1.40903	2.36727	0.132359	4.55064	5.34827e-06	3	personality
NO3_mean_cat_2	-0.0774784	-0.170496	0.0155395	0.925447	0.843246	1.01566	0.047459	-1.63253	0.102567	3	personality
NO3_mean_cat_3	-0.05879	-0.161134	0.0435543	0.942905	0.851178	1.04452	0.0522174	-1.12587	0.260221	3	personality
NO3_mean_cat_4	-0.026712	-0.138144	0.0847198	0.973642	0.870973	1.08841	0.056854	-0.469836	0.638472	3	personality
NO3_mean_cat_5	0.0609819	-0.0604483	0.182412	1.06288	0.941342	1.20011	0.0619553	0.984288	0.324974	3	personality
NO3_mean_cat_6	0.109405	-0.02315	0.241959	1.11561	0.977116	1.27374	0.0676311	1.61767	0.105734	3	personality
NO3_mean_cat_7	0.145065	-0.00191768	0.292047	1.15611	0.998084	1.33917	0.0749924	1.93439	0.0530649	3	personality
NOX_mean_cat_2	-0.00370058	-0.166103	0.158702	0.996306	0.846959	1.17199	0.0828598	-0.0446608	0.964378	3	personality
NOX_mean_cat_3	-0.0354707	-0.21953	0.148589	0.965151	0.802896	1.1602	0.0939096	-0.377711	0.705646	3	personality
NOX_mean_cat_4	0.0253707	-0.172945	0.223687	1.0257	0.841184	1.25068	0.101184	0.25074	0.802015	3	personality
NOX_mean_cat_5	0.130638	-0.0809003	0.342177	1.13956	0.922286	1.40801	0.10793	1.2104	0.226125	3	personality
NOX_mean_cat_6	0.210167	-0.0127756	0.433109	1.23388	0.987306	1.54204	0.113748	1.84765	0.0646531	3	personality
NOX_mean_cat_7	0.281084	0.0515318	0.510637	1.32457	1.05288	1.66635	0.117121	2.39995	0.0163972	3	personality
O3_mean_cat_2	-0.0408921	-0.113435	0.0316505	0.959933	0.892762	1.03216	0.0370122	-1.10483	0.269234	3	personality
O3_mean_cat_3	-0.0239319	-0.124126	0.0762621	0.976352	0.883269	1.07925	0.0511203	-0.468149	0.639678	3	personality
O3_mean_cat_4	0.0458345	-0.0725489	0.164218	1.0469	0.93002	1.17847	0.0604008	0.758839	0.447949	3	personality
O3_mean_cat_5	0.175177	0.0427412	0.307612	1.19146	1.04367	1.36017	0.0675704	2.59251	0.00952792	3	personality
O3_mean_cat_6	0.3005	0.15344	0.447559	1.35053	1.16584	1.56449	0.0750317	4.00497	6.20251e-05	3	personality
O3_mean_cat_7	0.395182	0.228432	0.561932	1.48465	1.25663	1.75406	0.0850783	4.64492	3.40201e-06	3	personality
OC_mean_cat_2	-0.0332663	-0.102889	0.0363569	0.967281	0.902227	1.03703	0.0355227	-0.93648	0.349026	3	personality
OC_mean_cat_3	0.0539324	-0.0332517	0.141116	1.05541	0.967295	1.15156	0.0444825	1.21244	0.225344	3	personality
OC_mean_cat_4	-0.00941909	-0.113459	0.0946211	0.990625	0.892741	1.09924	0.0530827	-0.177442	0.859161	3	personality
OC_mean_cat_5	-0.042098	-0.168203	0.0840074	0.958776	0.845182	1.08764	0.0643406	-0.654298	0.51292	3	personality
OC_mean_cat_6	-0.223691	-0.374818	-0.0725644	0.799562	0.687415	0.930006	0.0771068	-2.90105	0.0037191	3	personality
OC_mean_cat_7	-0.223466	-0.407731	-0.0392001	0.799742	0.665158	0.961558	0.0940147	-2.37692	0.0174578	3	personality
PM10_mean_cat_2	-0.045161	-0.163751	0.0734289	0.955844	0.848953	1.07619	0.0605062	-0.746387	0.455434	3	personality
PM10_mean_cat_3	-0.0849621	-0.227187	0.0572626	0.918547	0.796772	1.05893	0.072565	-1.17084	0.241662	3	personality
PM10_mean_cat_4	-0.0763274	-0.235729	0.0830745	0.926513	0.789995	1.08662	0.081329	-0.938502	0.347987	3	personality
PM10_mean_cat_5	-0.0602301	-0.235346	0.114886	0.941548	0.790297	1.12175	0.0893465	-0.674118	0.500237	3	personality
PM10_mean_cat_6	-0.0197865	-0.210568	0.170995	0.980408	0.810124	1.18648	0.0973391	-0.203274	0.838921	3	personality
PM10_mean_cat_7	-0.00907097	-0.216623	0.198481	0.99097	0.805234	1.21955	0.105896	-0.0856594	0.931737	3	personality
PM25_mean_cat_2	-0.031777	-0.164374	0.10082	0.968723	0.848425	1.10608	0.0676528	-0.469708	0.638564	3	personality
PM25_mean_cat_3	-0.06154	-0.229991	0.106911	0.940315	0.794541	1.11283	0.0859457	-0.716033	0.473971	3	personality
PM25_mean_cat_4	-0.0468673	-0.241672	0.147937	0.954214	0.785314	1.15944	0.0993919	-0.471541	0.637255	3	personality
PM25_mean_cat_5	-0.0834895	-0.296585	0.129606	0.919901	0.743353	1.13838	0.108724	-0.767902	0.442545	3	personality
PM25_mean_cat_6	-0.112109	-0.340567	0.116349	0.893947	0.711367	1.12339	0.116562	-0.961793	0.336153	3	personality
PM25_mean_cat_7	-0.112181	-0.358055	0.133693	0.893882	0.699034	1.14304	0.125448	-0.894241	0.371193	3	personality
SEASALT_mean_cat_2	0.105361	0.0538322	0.156889	1.11111	1.05531	1.16987	0.0262905	4.00755	6.13506e-05	3	personality
SEASALT_mean_cat_3	0.0692209	0.00971651	0.128725	1.07167	1.00976	1.13738	0.0303599	2.28001	0.0226072	3	personality
SEASALT_mean_cat_4	-0.0879001	-0.152893	-0.0229075	0.915852	0.858222	0.977353	0.0331601	-2.65078	0.0080306	3	personality
SEASALT_mean_cat_5	-0.151622	-0.220556	-0.0826867	0.859313	0.802072	0.92064	0.0351715	-4.31092	1.62575e-05	3	personality
SEASALT_mean_cat_6	-0.0860858	-0.158709	-0.0134623	0.917515	0.853244	0.986628	0.0370535	-2.32329	0.0201638	3	personality
SEASALT_mean_cat_7	-0.0725762	-0.15489	0.00973797	0.929995	0.856509	1.00979	0.0419978	-1.7281	0.0839711	3	personality
sia_mean_cat_2	0.391842	0.184216	0.599469	1.4797	1.20228	1.82115	0.105934	3.69893	0.000216509	3	personality
sia_mean_cat_3	0.642176	0.397694	0.886659	1.90061	1.48839	2.42701	0.124738	5.14819	2.63014e-07	3	personality
sia_mean_cat_4	0.768253	0.502525	1.03398	2.156	1.65289	2.81224	0.135578	5.66649	1.45751e-08	3	personality
sia_mean_cat_5	0.810577	0.528124	1.09303	2.24921	1.69575	2.9833	0.144111	5.62466	1.85871e-08	3	personality
sia_mean_cat_6	0.782071	0.485634	1.07851	2.186	1.62521	2.94029	0.151246	5.17084	2.33038e-07	3	personality
sia_mean_cat_7	0.785302	0.474792	1.09581	2.19307	1.60768	2.99161	0.158427	4.95688	7.16327e-07	3	personality
SO2_mean_cat_2	0.679253	0.536112	0.822394	1.9724	1.70935	2.27594	0.0730324	9.30072	1.39504e-20	3	personality
SO2_mean_cat_3	0.660142	0.492108	0.828176	1.93507	1.63576	2.28914	0.0857331	7.69996	1.36108e-14	3	personality
SO2_mean_cat_4	0.64226	0.454758	0.829761	1.90077	1.57579	2.29277	0.0956657	6.71358	1.89903e-11	3	personality
SO2_mean_cat_5	0.636687	0.433479	0.839894	1.89021	1.54262	2.31612	0.103679	6.14093	8.20377e-10	3	personality
SO2_mean_cat_6	0.613333	0.396435	0.830231	1.84658	1.48652	2.29385	0.110664	5.54228	2.98558e-08	3	personality
SO2_mean_cat_7	0.620864	0.388861	0.852866	1.86053	1.4753	2.34636	0.118371	5.24508	1.56214e-07	3	personality
SO4_mean_cat_2	0.683607	0.43774	0.929473	1.98101	1.5492	2.53317	0.125444	5.44948	5.05161e-08	3	personality
SO4_mean_cat_3	0.726346	0.432317	1.02037	2.06751	1.54082	2.77423	0.150017	4.84175	1.28703e-06	3	personality
SO4_mean_cat_4	0.969496	0.656939	1.28205	2.63662	1.92888	3.60404	0.159471	6.07945	1.20598e-09	3	personality
SO4_mean_cat_5	1.05456	0.727983	1.38115	2.87073	2.0709	3.97946	0.166626	6.32892	2.46891e-10	3	personality
SO4_mean_cat_6	1.0889	0.749797	1.428	2.97099	2.11657	4.17033	0.173013	6.29372	3.0995e-10	3	personality
SO4_mean_cat_7	1.04795	0.69732	1.39858	2.8518	2.00836	4.04946	0.178897	5.85786	4.68881e-09	3	personality
CO_mean_cat_2	-0.0926756	-0.181585	-0.00376576	0.911489	0.833947	0.996241	0.045363	-2.04298	0.0410546	4	personality
CO_mean_cat_3	-0.141166	-0.246619	-0.0357141	0.868345	0.781439	0.964916	0.0538032	-2.62375	0.00869664	4	personality
CO_mean_cat_4	-0.207568	-0.327843	-0.0872927	0.812558	0.720476	0.916409	0.0613659	-3.38246	0.000718399	4	personality
CO_mean_cat_5	-0.172032	-0.304682	-0.0393823	0.841952	0.737358	0.961383	0.0676796	-2.54186	0.0110265	4	personality
CO_mean_cat_6	-0.168928	-0.317514	-0.0203427	0.844569	0.727956	0.979863	0.0758104	-2.2283	0.0258605	4	personality
CO_mean_cat_7	-0.158859	-0.329203	0.011486	0.853117	0.719497	1.01155	0.0869121	-1.82781	0.0675784	4	personality
EC_mean_cat_2	0.206052	0.125491	0.286612	1.22882	1.13371	1.33191	0.041103	5.01305	5.35736e-07	4	personality
EC_mean_cat_3	0.287735	0.183183	0.392288	1.3334	1.20103	1.48036	0.0533441	5.39395	6.89249e-08	4	personality
EC_mean_cat_4	0.281379	0.157475	0.405283	1.32496	1.17055	1.49973	0.0632175	4.45096	8.54859e-06	4	personality
EC_mean_cat_5	0.257167	0.110739	0.403596	1.29326	1.1171	1.4972	0.0747098	3.44222	0.000576968	4	personality
EC_mean_cat_6	0.359785	0.187566	0.532005	1.43302	1.20631	1.70234	0.0878687	4.09458	4.22941e-05	4	personality
EC_mean_cat_7	0.379285	0.174656	0.583915	1.46124	1.19084	1.79304	0.104405	3.63284	0.000280316	4	personality
NH4_mean_cat_2	0.0577361	-0.107062	0.222534	1.05944	0.89847	1.24924	0.084082	0.686664	0.492294	4	personality
NH4_mean_cat_3	-0.084874	-0.27716	0.107412	0.918628	0.757933	1.11339	0.098107	-0.865117	0.386975	4	personality
NH4_mean_cat_4	-0.19431	-0.402343	0.0137228	0.823403	0.668751	1.01382	0.106141	-1.83068	0.0671489	4	personality
NH4_mean_cat_5	-0.174955	-0.395977	0.0460669	0.839495	0.673022	1.04714	0.112768	-1.55145	0.120793	4	personality
NH4_mean_cat_6	-0.0782147	-0.311203	0.154773	0.924766	0.732565	1.16739	0.118874	-0.657965	0.51056	4	personality
NH4_mean_cat_7	-0.0875065	-0.331707	0.156694	0.916213	0.717697	1.16964	0.124595	-0.70233	0.482474	4	personality
NO2_mean_cat_2	0.170596	0.00463513	0.336556	1.18601	1.00465	1.40012	0.0846754	2.0147	0.0439357	4	personality
NO2_mean_cat_3	0.334264	0.140958	0.527569	1.39691	1.15138	1.69481	0.0986272	3.38917	0.000701057	4	personality
NO2_mean_cat_4	0.435437	0.224532	0.646342	1.54564	1.25174	1.90855	0.107607	4.04656	5.19751e-05	4	personality
NO2_mean_cat_5	0.4676	0.239621	0.695578	1.59616	1.27077	2.00487	0.116318	4.02001	5.81948e-05	4	personality
NO2_mean_cat_6	0.416279	0.170723	0.661835	1.51631	1.18616	1.93835	0.125286	3.32263	0.00089173	4	personality
NO2_mean_cat_7	0.420459	0.159624	0.681295	1.52266	1.17307	1.97643	0.133082	3.15941	0.00158089	4	personality
NO3_mean_cat_2	-0.0765598	-0.169861	0.016742	0.926298	0.843782	1.01688	0.0476038	-1.60827	0.107776	4	personality
NO3_mean_cat_3	-0.0664936	-0.169316	0.0363287	0.935669	0.844242	1.037	0.0524613	-1.26748	0.204984	4	personality
NO3_mean_cat_4	-0.0301648	-0.142292	0.0819623	0.970286	0.867368	1.08541	0.0572088	-0.527276	0.598002	4	personality
NO3_mean_cat_5	0.0532514	-0.0690671	0.17557	1.05469	0.933264	1.19193	0.0624085	0.853271	0.393509	4	personality
NO3_mean_cat_6	0.0861053	-0.0475097	0.21972	1.08992	0.953601	1.24573	0.0681722	1.26306	0.206569	4	personality
NO3_mean_cat_7	0.116177	-0.0319325	0.264287	1.12319	0.968572	1.3025	0.0755675	1.5374	0.124196	4	personality
NOX_mean_cat_2	-0.00965542	-0.172597	0.153286	0.990391	0.841476	1.16566	0.0831351	-0.116141	0.907541	4	personality
NOX_mean_cat_3	-0.0139118	-0.198908	0.171084	0.986185	0.819626	1.18659	0.0943873	-0.147391	0.882824	4	personality
NOX_mean_cat_4	0.0705826	-0.128959	0.270124	1.07313	0.87901	1.31013	0.101809	0.693286	0.48813	4	personality
NOX_mean_cat_5	0.198329	-0.0145935	0.411251	1.21936	0.985512	1.5087	0.108636	1.82563	0.0679061	4	personality
NOX_mean_cat_6	0.295965	0.0714289	0.520501	1.34442	1.07404	1.68287	0.114561	2.58346	0.00978138	4	personality
NOX_mean_cat_7	0.36152	0.130095	0.592945	1.43551	1.13894	1.80931	0.118076	3.06175	0.00220044	4	personality
O3_mean_cat_2	0.00857956	-0.0650729	0.082232	1.00862	0.936999	1.08571	0.0375785	0.22831	0.819405	4	personality
O3_mean_cat_3	0.0293291	-0.0718863	0.130544	1.02976	0.930637	1.13945	0.0516414	0.567937	0.570077	4	personality
O3_mean_cat_4	0.0817829	-0.0374291	0.200995	1.08522	0.963263	1.22262	0.0608236	1.34459	0.178757	4	personality
O3_mean_cat_5	0.173169	0.0401132	0.306225	1.18907	1.04093	1.35829	0.0678868	2.55085	0.0107461	4	personality
O3_mean_cat_6	0.278305	0.130755	0.425855	1.32089	1.13969	1.5309	0.0752819	3.69683	0.000218305	4	personality
O3_mean_cat_7	0.396014	0.228801	0.563227	1.48589	1.25709	1.75633	0.0853142	4.64183	3.4534e-06	4	personality
OC_mean_cat_2	0.00202962	-0.0677645	0.0718237	1.00203	0.934481	1.07447	0.0356099	0.0569959	0.954548	4	personality
OC_mean_cat_3	0.0968212	0.00936827	0.184274	1.10166	1.00941	1.20235	0.0446197	2.16992	0.0300127	4	personality
OC_mean_cat_4	0.0719636	-0.0323268	0.176254	1.07462	0.96819	1.19274	0.0532103	1.35244	0.176236	4	personality
OC_mean_cat_5	0.0872587	-0.0390671	0.213584	1.09118	0.961686	1.23811	0.0644531	1.35383	0.17579	4	personality
OC_mean_cat_6	0.0312498	-0.121436	0.183936	1.03174	0.885648	1.20194	0.0779024	0.40114	0.688317	4	personality
OC_mean_cat_7	0.0795157	-0.106896	0.265927	1.08276	0.898619	1.30464	0.0951097	0.836042	0.403131	4	personality
PM10_mean_cat_2	-0.0732267	-0.191774	0.0453209	0.92939	0.825493	1.04636	0.0604846	-1.21067	0.226023	4	personality
PM10_mean_cat_3	-0.135348	-0.277752	0.00705566	0.873412	0.757484	1.00708	0.0726564	-1.86285	0.0624828	4	personality
PM10_mean_cat_4	-0.146775	-0.306588	0.0130368	0.863488	0.735954	1.01312	0.0815383	-1.80008	0.0718483	4	personality
PM10_mean_cat_5	-0.147147	-0.322853	0.0285581	0.863167	0.72408	1.02897	0.0896473	-1.6414	0.100714	4	personality
PM10_mean_cat_6	-0.114132	-0.305642	0.0773777	0.89214	0.73665	1.08045	0.0977109	-1.16806	0.242783	4	personality
PM10_mean_cat_7	-0.108651	-0.317104	0.0998021	0.897044	0.728255	1.10495	0.106355	-1.02158	0.306979	4	personality
PM25_mean_cat_2	-0.00082835	-0.134106	0.132449	0.999172	0.874497	1.14162	0.068	-0.0121816	0.990281	4	personality
PM25_mean_cat_3	-0.00869517	-0.178217	0.160827	0.991343	0.836761	1.17448	0.0864923	-0.100531	0.919923	4	personality
PM25_mean_cat_4	0.0207065	-0.175411	0.216824	1.02092	0.839112	1.24213	0.100062	0.206937	0.836059	4	personality
PM25_mean_cat_5	-0.0120144	-0.226656	0.202628	0.988058	0.797195	1.22462	0.109513	-0.109707	0.912642	4	personality
PM25_mean_cat_6	-0.0488528	-0.279054	0.181348	0.952321	0.756499	1.19883	0.117452	-0.41594	0.677454	4	personality
PM25_mean_cat_7	-0.0608374	-0.308753	0.187079	0.940976	0.734362	1.20572	0.12649	-0.480965	0.630541	4	personality
SEASALT_mean_cat_2	0.0976487	0.044261	0.151036	1.10258	1.04526	1.16304	0.0272391	3.58487	0.000337247	4	personality
SEASALT_mean_cat_3	0.0577443	-0.00553588	0.121025	1.05944	0.994479	1.12865	0.0322864	1.7885	0.073695	4	personality
SEASALT_mean_cat_4	-0.0736813	-0.144888	-0.00247501	0.928968	0.86512	0.997528	0.0363304	-2.02809	0.0425512	4	personality
SEASALT_mean_cat_5	-0.131757	-0.205422	-0.0580925	0.876554	0.814303	0.943563	0.0375848	-3.5056	0.000455577	4	personality
SEASALT_mean_cat_6	-0.0600759	-0.137816	0.0176637	0.941693	0.871259	1.01782	0.0396638	-1.51463	0.129866	4	personality
SEASALT_mean_cat_7	-0.041085	-0.12775	0.0455803	0.959748	0.880073	1.04664	0.0442178	-0.92915	0.352811	4	personality
sia_mean_cat_2	0.387954	0.181076	0.594831	1.47396	1.19851	1.81272	0.105552	3.67549	0.000237393	4	personality
sia_mean_cat_3	0.633624	0.389747	0.877502	1.88443	1.47661	2.40488	0.124429	5.09224	3.53861e-07	4	personality
sia_mean_cat_4	0.752116	0.486903	1.01733	2.12149	1.62727	2.7658	0.135316	5.55824	2.72508e-08	4	personality
sia_mean_cat_5	0.792622	0.510617	1.07463	2.20918	1.66632	2.9289	0.143883	5.5088	3.61284e-08	4	personality
sia_mean_cat_6	0.75914	0.463071	1.05521	2.13644	1.58895	2.87257	0.151058	5.02548	5.02166e-07	4	personality
sia_mean_cat_7	0.775475	0.465204	1.08575	2.17162	1.59234	2.96165	0.158304	4.89864	9.65034e-07	4	personality
SO2_mean_cat_2	0.646965	0.50393	0.789999	1.90974	1.65521	2.20339	0.0729781	8.86519	7.63734e-19	4	personality
SO2_mean_cat_3	0.61289	0.444939	0.780842	1.84576	1.56039	2.18331	0.0856914	7.1523	8.53343e-13	4	personality
SO2_mean_cat_4	0.580689	0.393145	0.768233	1.78727	1.48163	2.15595	0.0956874	6.0686	1.29028e-09	4	personality
SO2_mean_cat_5	0.572708	0.369334	0.776082	1.77306	1.44677	2.17294	0.103764	5.51932	3.40321e-08	4	personality
SO2_mean_cat_6	0.55411	0.337059	0.771162	1.74039	1.40082	2.16228	0.110743	5.00358	5.6274e-07	4	personality
SO2_mean_cat_7	0.559331	0.327196	0.791466	1.7495	1.38707	2.20663	0.118438	4.72255	2.32909e-06	4	personality
SO4_mean_cat_2	0.666085	0.421902	0.910268	1.9466	1.52486	2.48499	0.124586	5.3464	8.97192e-08	4	personality
SO4_mean_cat_3	0.695184	0.402635	0.987733	2.00408	1.49576	2.68514	0.149262	4.65746	3.20137e-06	4	personality
SO4_mean_cat_4	0.935689	0.624497	1.24688	2.54897	1.86731	3.47947	0.158774	5.8932	3.78777e-09	4	personality
SO4_mean_cat_5	1.0137	0.688361	1.33903	2.75577	1.99045	3.81535	0.16599	6.10696	1.01549e-09	4	personality
SO4_mean_cat_6	1.05284	0.715001	1.39069	2.86579	2.04419	4.01761	0.172372	6.10797	1.00906e-09	4	personality
SO4_mean_cat_7	1.01452	0.665081	1.36396	2.75805	1.94465	3.91167	0.17829	5.6903	1.26816e-08	4	personality
CO_mean_cat_2	-0.0635578	-0.209986	0.0828704	0.93842	0.810595	1.0864	0.0747097	-0.850731	0.394919	0	schizophrenia
CO_mean_cat_3	-0.0327438	-0.206702	0.141215	0.967786	0.813262	1.15167	0.0887561	-0.368919	0.712188	0	schizophrenia
CO_mean_cat_4	-0.0323735	-0.230309	0.165563	0.968145	0.794288	1.18006	0.10099	-0.320562	0.748542	0	schizophrenia
CO_mean_cat_5	0.0817633	-0.135062	0.298588	1.0852	0.873662	1.34795	0.110627	0.73909	0.459852	0	schizophrenia
CO_mean_cat_6	0.117844	-0.123142	0.35883	1.12507	0.884138	1.43165	0.122954	0.958437	0.337842	0	schizophrenia
CO_mean_cat_7	0.086006	-0.186441	0.358453	1.08981	0.829908	1.43111	0.139006	0.618721	0.5361	0	schizophrenia
EC_mean_cat_2	0.270493	0.14131	0.399676	1.31061	1.15178	1.49134	0.065911	4.10391	4.06229e-05	0	schizophrenia
EC_mean_cat_3	0.280199	0.110716	0.449681	1.32339	1.11708	1.56781	0.0864723	3.24033	0.00119392	0	schizophrenia
EC_mean_cat_4	0.313781	0.110238	0.517325	1.36859	1.11654	1.67753	0.103851	3.02147	0.00251552	0	schizophrenia
EC_mean_cat_5	0.26733	0.0246052	0.510054	1.30647	1.02491	1.66538	0.123841	2.15865	0.0308775	0	schizophrenia
EC_mean_cat_6	0.318257	0.0297766	0.606738	1.37473	1.03022	1.83444	0.147187	2.16227	0.0305975	0	schizophrenia
EC_mean_cat_7	0.348884	0.01069	0.687077	1.41748	1.01075	1.9879	0.172551	2.02192	0.043185	0	schizophrenia
NH4_mean_cat_2	0.0250074	-0.215567	0.265582	1.02532	0.806084	1.30419	0.122744	0.203736	0.83856	0	schizophrenia
NH4_mean_cat_3	-0.14598	-0.428653	0.136692	0.864175	0.651386	1.14647	0.144223	-1.01218	0.31145	0	schizophrenia
NH4_mean_cat_4	-0.27076	-0.575913	0.0343931	0.7628	0.562192	1.03499	0.155693	-1.73906	0.082024	0	schizophrenia
NH4_mean_cat_5	-0.268233	-0.592056	0.05559	0.764729	0.553188	1.05716	0.165219	-1.6235	0.104482	0	schizophrenia
NH4_mean_cat_6	-0.322918	-0.664733	0.0188962	0.724033	0.514411	1.01908	0.174398	-1.85161	0.0640814	0	schizophrenia
NH4_mean_cat_7	-0.423244	-0.784115	-0.0623735	0.654919	0.456523	0.939532	0.184121	-2.29873	0.0215204	0	schizophrenia
NO2_mean_cat_2	0.0391542	-0.232576	0.310884	1.03993	0.79249	1.36463	0.13864	0.282416	0.777624	0	schizophrenia
NO2_mean_cat_3	0.155871	-0.162847	0.474588	1.16868	0.849721	1.60735	0.162614	0.958532	0.337795	0	schizophrenia
NO2_mean_cat_4	0.201109	-0.148631	0.55085	1.22276	0.861887	1.73473	0.178442	1.12703	0.259731	0	schizophrenia
NO2_mean_cat_5	0.300561	-0.077882	0.679004	1.35062	0.925074	1.97191	0.193087	1.55661	0.119563	0	schizophrenia
NO2_mean_cat_6	0.21706	-0.189341	0.623462	1.24242	0.827504	1.86537	0.207351	1.04682	0.295182	0	schizophrenia
NO2_mean_cat_7	0.296243	-0.132666	0.725151	1.3448	0.875758	2.06504	0.218835	1.35373	0.175824	0	schizophrenia
NO3_mean_cat_2	0.21812	0.0773099	0.35893	1.24374	1.08038	1.4318	0.0718432	3.03606	0.00239694	0	schizophrenia
NO3_mean_cat_3	0.430392	0.280074	0.580709	1.53786	1.32323	1.78731	0.0766942	5.61179	2.00244e-08	0	schizophrenia
NO3_mean_cat_4	0.538169	0.378863	0.697475	1.71287	1.46062	2.00867	0.0812799	6.62118	3.56343e-11	0	schizophrenia
NO3_mean_cat_5	0.664945	0.496211	0.833679	1.94438	1.64249	2.30177	0.0860904	7.7238	1.12914e-14	0	schizophrenia
NO3_mean_cat_6	0.788477	0.610404	0.96655	2.20004	1.84117	2.62886	0.0908552	8.67838	4.01431e-18	0	schizophrenia
NO3_mean_cat_7	0.851817	0.661281	1.04235	2.3439	1.93727	2.83588	0.0972137	8.76231	1.91285e-18	0	schizophrenia
NOX_mean_cat_2	0.107408	-0.15983	0.374646	1.11339	0.852289	1.45448	0.136348	0.787746	0.430845	0	schizophrenia
NOX_mean_cat_3	0.24775	-0.0565033	0.552003	1.28114	0.945063	1.73673	0.155234	1.59598	0.110494	0	schizophrenia
NOX_mean_cat_4	0.42104	0.0917937	0.750286	1.52354	1.09614	2.11761	0.167986	2.5064	0.0121967	0	schizophrenia
NOX_mean_cat_5	0.499969	0.147975	0.851963	1.64867	1.15948	2.34424	0.179592	2.78391	0.00537073	0	schizophrenia
NOX_mean_cat_6	0.653151	0.283211	1.02309	1.92159	1.32739	2.78178	0.188748	3.46043	0.000539308	0	schizophrenia
NOX_mean_cat_7	0.749318	0.369327	1.12931	2.11556	1.44676	3.09352	0.193876	3.86493	0.000111122	0	schizophrenia
O3_mean_cat_2	0.0350656	-0.0803458	0.150477	1.03569	0.922797	1.16239	0.0588844	0.595498	0.551511	0	schizophrenia
O3_mean_cat_3	0.102935	-0.0589184	0.264789	1.10842	0.942784	1.30316	0.0825798	1.24649	0.212584	0	schizophrenia
O3_mean_cat_4	0.228778	0.0363508	0.421205	1.25706	1.03702	1.5238	0.0981789	2.33021	0.0197948	0	schizophrenia
O3_mean_cat_5	0.321473	0.104573	0.538372	1.37916	1.11024	1.71322	0.110665	2.90492	0.00367351	0	schizophrenia
O3_mean_cat_6	0.471027	0.229515	0.712539	1.60164	1.25799	2.03916	0.123223	3.82257	0.000132069	0	schizophrenia
O3_mean_cat_7	0.526622	0.252658	0.800586	1.6932	1.28744	2.22684	0.13978	3.7675	0.000164889	0	schizophrenia
OC_mean_cat_2	0.00806902	-0.104661	0.120799	1.0081	0.90063	1.1284	0.0575164	0.140291	0.88843	0	schizophrenia
OC_mean_cat_3	0.0216149	-0.122952	0.166182	1.02185	0.884306	1.18079	0.0737602	0.293042	0.76949	0	schizophrenia
OC_mean_cat_4	-0.0256341	-0.199048	0.14778	0.974692	0.81951	1.15926	0.0884782	-0.289723	0.772028	0	schizophrenia
OC_mean_cat_5	-0.0334174	-0.245136	0.178301	0.967135	0.782598	1.19519	0.108022	-0.309358	0.757049	0	schizophrenia
OC_mean_cat_6	-0.000482123	-0.255966	0.255001	0.999518	0.774169	1.29046	0.130351	-0.00369865	0.997049	0	schizophrenia
OC_mean_cat_7	0.19135	-0.113512	0.496213	1.21088	0.892693	1.64249	0.155545	1.23019	0.218625	0	schizophrenia
PM10_mean_cat_2	-0.281423	-0.452238	-0.110608	0.754709	0.636203	0.89529	0.0871521	-3.2291	0.00124182	0	schizophrenia
PM10_mean_cat_3	-0.419688	-0.62771	-0.211665	0.657252	0.533813	0.809235	0.106136	-3.95425	7.67737e-05	0	schizophrenia
PM10_mean_cat_4	-0.641832	-0.877976	-0.405688	0.526327	0.415623	0.666518	0.120484	-5.32711	9.97862e-08	0	schizophrenia
PM10_mean_cat_5	-0.613775	-0.876117	-0.351432	0.541304	0.416396	0.703679	0.133851	-4.58552	4.52862e-06	0	schizophrenia
PM10_mean_cat_6	-0.641182	-0.930217	-0.352147	0.526669	0.394468	0.703176	0.147469	-4.3479	1.37448e-05	0	schizophrenia
PM10_mean_cat_7	-0.667471	-0.984434	-0.350509	0.513004	0.373651	0.70433	0.161719	-4.12736	3.66945e-05	0	schizophrenia
PM25_mean_cat_2	-0.0880919	-0.28105	0.104866	0.915677	0.75499	1.11056	0.0984499	-0.894789	0.3709	0	schizophrenia
PM25_mean_cat_3	0.0066683	-0.241923	0.25526	1.00669	0.785116	1.2908	0.126835	0.0525747	0.958071	0	schizophrenia
PM25_mean_cat_4	0.0144982	-0.274812	0.303809	1.0146	0.759715	1.35501	0.14761	0.0982193	0.921758	0	schizophrenia
PM25_mean_cat_5	-0.0914678	-0.412682	0.229747	0.912591	0.661873	1.25828	0.163888	-0.558112	0.576768	0	schizophrenia
PM25_mean_cat_6	-0.166106	-0.51567	0.183458	0.846956	0.5971	1.20136	0.178352	-0.931339	0.351678	0	schizophrenia
PM25_mean_cat_7	-0.252591	-0.634222	0.12904	0.776786	0.530348	1.13774	0.194713	-1.29725	0.194546	0	schizophrenia
SEASALT_mean_cat_2	0.0393323	-0.0391034	0.117768	1.04012	0.961651	1.12498	0.0400189	0.982842	0.325685	0	schizophrenia
SEASALT_mean_cat_3	-0.0226978	-0.116714	0.0713182	0.977558	0.88984	1.07392	0.0479682	-0.473184	0.636082	0	schizophrenia
SEASALT_mean_cat_4	-0.0135172	-0.116514	0.0894797	0.986574	0.890017	1.09361	0.0525504	-0.257223	0.797006	0	schizophrenia
SEASALT_mean_cat_5	-0.023586	-0.133152	0.0859802	0.97669	0.875332	1.08978	0.0559021	-0.421916	0.673086	0	schizophrenia
SEASALT_mean_cat_6	0.114035	-0.00171054	0.229781	1.12079	0.998291	1.25832	0.059055	1.931	0.0534832	0	schizophrenia
SEASALT_mean_cat_7	0.309064	0.178463	0.439665	1.36215	1.19538	1.55219	0.0666344	4.63821	3.51445e-06	0	schizophrenia
sia_mean_cat_2	0.0586228	-0.233588	0.350833	1.06038	0.791688	1.42025	0.14909	0.393205	0.694168	0	schizophrenia
sia_mean_cat_3	-0.0944079	-0.447507	0.258691	0.909912	0.63922	1.29523	0.180156	-0.524034	0.600255	0	schizophrenia
sia_mean_cat_4	-0.0451886	-0.428855	0.338477	0.955817	0.651255	1.40281	0.195752	-0.230846	0.817434	0	schizophrenia
sia_mean_cat_5	-0.174907	-0.583089	0.233274	0.839535	0.558172	1.26273	0.20826	-0.839852	0.400991	0	schizophrenia
sia_mean_cat_6	-0.151244	-0.581899	0.279412	0.859638	0.558836	1.32235	0.219726	-0.688328	0.491246	0	schizophrenia
sia_mean_cat_7	-0.0834964	-0.538977	0.371984	0.919894	0.583345	1.45061	0.232392	-0.359291	0.719377	0	schizophrenia
SO2_mean_cat_2	0.0763584	-0.123202	0.275919	1.07935	0.884085	1.31774	0.101818	0.749948	0.453286	0	schizophrenia
SO2_mean_cat_3	0.0775373	-0.16439	0.319464	1.08062	0.848411	1.37639	0.123434	0.628166	0.529895	0	schizophrenia
SO2_mean_cat_4	0.055416	-0.218599	0.329431	1.05698	0.803644	1.39018	0.139806	0.396377	0.691827	0	schizophrenia
SO2_mean_cat_5	-0.0453464	-0.345002	0.254309	0.955666	0.708219	1.28957	0.152888	-0.296599	0.766773	0	schizophrenia
SO2_mean_cat_6	-0.0232036	-0.345472	0.299065	0.977064	0.707886	1.3486	0.164426	-0.141119	0.887776	0	schizophrenia
SO2_mean_cat_7	-0.00141273	-0.348781	0.345955	0.998588	0.705548	1.41334	0.177232	-0.00797107	0.99364	0	schizophrenia
SO4_mean_cat_2	-0.272924	-0.527864	-0.0179851	0.76115	0.589864	0.982176	0.130073	-2.09823	0.0358846	0	schizophrenia
SO4_mean_cat_3	-0.369955	-0.67945	-0.0604589	0.690766	0.506896	0.941332	0.157909	-2.34284	0.0191378	0	schizophrenia
SO4_mean_cat_4	-0.195276	-0.536454	0.145901	0.822607	0.584818	1.15708	0.174073	-1.1218	0.261946	0	schizophrenia
SO4_mean_cat_5	-0.151597	-0.519116	0.215921	0.859334	0.595046	1.241	0.187513	-0.808462	0.418824	0	schizophrenia
SO4_mean_cat_6	-0.301369	-0.695216	0.0924777	0.739804	0.498966	1.09689	0.200946	-1.49975	0.133679	0	schizophrenia
SO4_mean_cat_7	-0.583023	-1.0024	-0.163641	0.558208	0.366996	0.849047	0.213974	-2.72473	0.00643533	0	schizophrenia
CO_mean_cat_2	-0.0269592	-0.174472	0.120554	0.973401	0.8399	1.12812	0.0752632	-0.358199	0.720195	1	schizophrenia
CO_mean_cat_3	0.0358006	-0.140257	0.211858	1.03645	0.869135	1.23597	0.0898269	0.398551	0.690224	1	schizophrenia
CO_mean_cat_4	0.0645875	-0.136211	0.265386	1.06672	0.872659	1.30393	0.10245	0.630429	0.528414	1	schizophrenia
CO_mean_cat_5	0.211271	-0.00963288	0.432174	1.23525	0.990413	1.5406	0.112708	1.8745	0.060862	1	schizophrenia
CO_mean_cat_6	0.27304	0.0268889	0.519191	1.31395	1.02725	1.68067	0.125589	2.17407	0.0297002	1	schizophrenia
CO_mean_cat_7	0.262673	-0.0158615	0.541208	1.3004	0.984264	1.71808	0.142112	1.84835	0.0645515	1	schizophrenia
EC_mean_cat_2	0.24683	0.116702	0.376958	1.27996	1.12378	1.45784	0.0663928	3.71772	0.00020103	1	schizophrenia
EC_mean_cat_3	0.234424	0.0633605	0.405487	1.26418	1.06541	1.50003	0.0872787	2.68592	0.00723304	1	schizophrenia
EC_mean_cat_4	0.25137	0.0461519	0.456587	1.28579	1.04723	1.57868	0.104705	2.40074	0.0163617	1	schizophrenia
EC_mean_cat_5	0.197053	-0.0474781	0.441585	1.21781	0.953631	1.55517	0.124763	1.57942	0.11424	1	schizophrenia
EC_mean_cat_6	0.239375	-0.050682	0.529431	1.27045	0.950581	1.69797	0.147991	1.6175	0.105771	1	schizophrenia
EC_mean_cat_7	0.256069	-0.0837277	0.595866	1.29184	0.919682	1.8146	0.173369	1.47702	0.139671	1	schizophrenia
NH4_mean_cat_2	0.0610708	-0.181683	0.303825	1.06297	0.833865	1.35503	0.123856	0.493077	0.621958	1	schizophrenia
NH4_mean_cat_3	-0.0645732	-0.351923	0.222777	0.937468	0.703334	1.24954	0.14661	-0.440442	0.659617	1	schizophrenia
NH4_mean_cat_4	-0.141342	-0.453514	0.17083	0.868192	0.635391	1.18629	0.159274	-0.887413	0.374857	1	schizophrenia
NH4_mean_cat_5	-0.0867115	-0.419943	0.24652	0.916942	0.657084	1.27956	0.170019	-0.51001	0.610044	1	schizophrenia
NH4_mean_cat_6	-0.0833579	-0.437359	0.270643	0.920022	0.645739	1.31081	0.180616	-0.461519	0.644426	1	schizophrenia
NH4_mean_cat_7	-0.156435	-0.53052	0.217649	0.855187	0.588299	1.24315	0.190863	-0.819622	0.412431	1	schizophrenia
NO2_mean_cat_2	0.0144667	-0.256522	0.285455	1.01457	0.773738	1.33037	0.138262	0.104633	0.916667	1	schizophrenia
NO2_mean_cat_3	0.115577	-0.202653	0.433807	1.12252	0.816562	1.54312	0.162365	0.711834	0.476568	1	schizophrenia
NO2_mean_cat_4	0.140657	-0.20905	0.490363	1.15103	0.811355	1.63291	0.178425	0.788324	0.430507	1	schizophrenia
NO2_mean_cat_5	0.223127	-0.155697	0.601951	1.24998	0.855818	1.82568	0.193281	1.15442	0.248329	1	schizophrenia
NO2_mean_cat_6	0.116694	-0.290597	0.523985	1.12378	0.747817	1.68874	0.207805	0.561553	0.574421	1	schizophrenia
NO2_mean_cat_7	0.188012	-0.24194	0.617964	1.20685	0.785103	1.85515	0.219367	0.857064	0.391409	1	schizophrenia
NO3_mean_cat_2	0.128764	-0.0181081	0.275637	1.13742	0.982055	1.31737	0.0749363	1.71832	0.0857387	1	schizophrenia
NO3_mean_cat_3	0.280338	0.117537	0.443138	1.32358	1.12472	1.55759	0.083063	3.375	0.000738154	1	schizophrenia
NO3_mean_cat_4	0.336154	0.157965	0.514344	1.39956	1.17112	1.67254	0.0909148	3.69747	0.000217761	1	schizophrenia
NO3_mean_cat_5	0.4057	0.210545	0.600855	1.50035	1.23435	1.82368	0.0995705	4.0745	4.61133e-05	1	schizophrenia
NO3_mean_cat_6	0.456821	0.243249	0.670394	1.57905	1.27539	1.95501	0.108968	4.19227	2.76181e-05	1	schizophrenia
NO3_mean_cat_7	0.421888	0.18291	0.660866	1.52484	1.20071	1.93647	0.12193	3.46009	0.000539988	1	schizophrenia
NOX_mean_cat_2	0.102361	-0.164169	0.36889	1.10778	0.848599	1.44613	0.135987	0.752724	0.451616	1	schizophrenia
NOX_mean_cat_3	0.239431	-0.0642346	0.543097	1.27053	0.937785	1.72133	0.154934	1.54537	0.122256	1	schizophrenia
NOX_mean_cat_4	0.413984	0.0851295	0.742838	1.51283	1.08886	2.10189	0.167786	2.46733	0.0136123	1	schizophrenia
NOX_mean_cat_5	0.498877	0.14715	0.850605	1.64687	1.15853	2.34106	0.179456	2.77994	0.00543688	1	schizophrenia
NOX_mean_cat_6	0.658196	0.288463	1.02793	1.93131	1.33437	2.79527	0.188643	3.48911	0.000484634	1	schizophrenia
NOX_mean_cat_7	0.760803	0.381005	1.1406	2.13999	1.46375	3.12865	0.193778	3.92615	8.63157e-05	1	schizophrenia
O3_mean_cat_2	0.0488157	-0.0668317	0.164463	1.05003	0.935353	1.17876	0.0590049	0.827316	0.408058	1	schizophrenia
O3_mean_cat_3	0.124723	-0.0375337	0.286979	1.13283	0.963162	1.3324	0.0827855	1.50658	0.131919	1	schizophrenia
O3_mean_cat_4	0.256379	0.0634369	0.449322	1.29224	1.06549	1.56725	0.0984418	2.60437	0.00920421	1	schizophrenia
O3_mean_cat_5	0.351717	0.134177	0.569257	1.42151	1.1436	1.76695	0.110992	3.16886	0.00153039	1	schizophrenia
O3_mean_cat_6	0.501036	0.258722	0.743349	1.65043	1.29527	2.10297	0.123632	4.05265	5.06401e-05	1	schizophrenia
O3_mean_cat_7	0.557036	0.282337	0.831735	1.74549	1.32623	2.2973	0.140155	3.97442	7.05508e-05	1	schizophrenia
OC_mean_cat_2	-0.0102573	-0.122893	0.102379	0.989795	0.884358	1.1078	0.0574683	-0.178486	0.858341	1	schizophrenia
OC_mean_cat_3	0.00620832	-0.138327	0.150744	1.00623	0.870813	1.1627	0.0737441	0.0841873	0.932908	1	schizophrenia
OC_mean_cat_4	-0.0377138	-0.211401	0.135974	0.962989	0.809449	1.14565	0.0886178	-0.425578	0.670415	1	schizophrenia
OC_mean_cat_5	-0.06521	-0.277714	0.147294	0.936871	0.757513	1.15869	0.108422	-0.601444	0.547544	1	schizophrenia
OC_mean_cat_6	-0.0554	-0.312178	0.201378	0.946107	0.731851	1.22309	0.131012	-0.422863	0.672395	1	schizophrenia
OC_mean_cat_7	0.126061	-0.180412	0.432535	1.13435	0.834926	1.54116	0.156367	0.806189	0.420134	1	schizophrenia
PM10_mean_cat_2	-0.266509	-0.439029	-0.0939882	0.766049	0.644662	0.910293	0.0880222	-3.02774	0.00246388	1	schizophrenia
PM10_mean_cat_3	-0.390804	-0.601655	-0.179952	0.676513	0.547904	0.83531	0.107579	-3.63271	0.000280463	1	schizophrenia
PM10_mean_cat_4	-0.594911	-0.834527	-0.355294	0.551612	0.43408	0.700967	0.122256	-4.86612	1.13811e-06	1	schizophrenia
PM10_mean_cat_5	-0.537224	-0.803116	-0.271332	0.584368	0.447931	0.762363	0.135662	-3.96003	7.494e-05	1	schizophrenia
PM10_mean_cat_6	-0.52127	-0.814279	-0.228261	0.593766	0.442958	0.795916	0.149497	-3.48683	0.00048879	1	schizophrenia
PM10_mean_cat_7	-0.489047	-0.812059	-0.166035	0.613211	0.443943	0.847016	0.164805	-2.96743	0.00300301	1	schizophrenia
PM25_mean_cat_2	-0.0727818	-0.269778	0.124215	0.929804	0.763549	1.13226	0.10051	-0.724123	0.46899	1	schizophrenia
PM25_mean_cat_3	0.0302888	-0.225047	0.285625	1.03075	0.798479	1.33059	0.130276	0.232498	0.816152	1	schizophrenia
PM25_mean_cat_4	0.0423739	-0.253484	0.338231	1.04328	0.776092	1.40247	0.150951	0.280714	0.77893	1	schizophrenia
PM25_mean_cat_5	-0.0682438	-0.393715	0.257228	0.934033	0.674546	1.29334	0.16606	-0.410959	0.681103	1	schizophrenia
PM25_mean_cat_6	-0.144165	-0.495911	0.207581	0.865745	0.609016	1.2307	0.179466	-0.803301	0.421801	1	schizophrenia
PM25_mean_cat_7	-0.205107	-0.58939	0.179177	0.814561	0.554666	1.19623	0.196067	-1.04611	0.295512	1	schizophrenia
SEASALT_mean_cat_2	0.0539231	-0.0251799	0.133026	1.0554	0.975134	1.14228	0.0403594	1.33607	0.181525	1	schizophrenia
SEASALT_mean_cat_3	0.00286097	-0.0926709	0.0983928	1.00287	0.911493	1.1034	0.0487416	0.0586967	0.953194	1	schizophrenia
SEASALT_mean_cat_4	0.0225509	-0.0821585	0.12726	1.02281	0.921126	1.13571	0.0534242	0.422111	0.672944	1	schizophrenia
SEASALT_mean_cat_5	0.0243252	-0.0875207	0.136171	1.02462	0.9162	1.14588	0.0570653	0.42627	0.669911	1	schizophrenia
SEASALT_mean_cat_6	0.162021	0.0442608	0.279781	1.17588	1.04525	1.32284	0.0600828	2.69663	0.00700456	1	schizophrenia
SEASALT_mean_cat_7	0.352195	0.219683	0.484706	1.42219	1.24568	1.6237	0.0676092	5.20927	1.89584e-07	1	schizophrenia
sia_mean_cat_2	0.124417	-0.169788	0.418622	1.13249	0.843844	1.51986	0.150107	0.828855	0.407187	1	schizophrenia
sia_mean_cat_3	0.0327014	-0.324931	0.390334	1.03324	0.722577	1.47747	0.182469	0.179216	0.857768	1	schizophrenia
sia_mean_cat_4	0.148158	-0.243497	0.539812	1.1597	0.783882	1.71568	0.199827	0.741428	0.458434	1	schizophrenia
sia_mean_cat_5	0.0854307	-0.334426	0.505288	1.08919	0.715749	1.65746	0.214217	0.398805	0.690037	1	schizophrenia
sia_mean_cat_6	0.160679	-0.284382	0.60574	1.17431	0.752479	1.83261	0.227076	0.707601	0.479193	1	schizophrenia
sia_mean_cat_7	0.280366	-0.192079	0.752811	1.32361	0.825242	2.12296	0.241048	1.16311	0.244784	1	schizophrenia
SO2_mean_cat_2	0.126556	-0.0747817	0.327894	1.13491	0.927946	1.38804	0.102725	1.23199	0.217954	1	schizophrenia
SO2_mean_cat_3	0.165946	-0.0793513	0.411243	1.18051	0.923715	1.50869	0.125154	1.32593	0.184862	1	schizophrenia
SO2_mean_cat_4	0.182508	-0.0966071	0.461624	1.20022	0.907913	1.58665	0.142408	1.28158	0.199989	1	schizophrenia
SO2_mean_cat_5	0.117836	-0.188412	0.424085	1.12506	0.828273	1.52819	0.156252	0.754142	0.450764	1	schizophrenia
SO2_mean_cat_6	0.173017	-0.157264	0.503298	1.18889	0.854478	1.65417	0.168514	1.02672	0.304551	1	schizophrenia
SO2_mean_cat_7	0.250066	-0.107927	0.608059	1.28411	0.897693	1.83686	0.182653	1.36908	0.170976	1	schizophrenia
SO4_mean_cat_2	-0.226734	-0.548214	0.0947448	0.797132	0.577981	1.09938	0.164023	-1.38233	0.16687	1	schizophrenia
SO4_mean_cat_3	-0.28024	-0.681566	0.121087	0.755603	0.505824	1.12872	0.204762	-1.36861	0.171121	1	schizophrenia
SO4_mean_cat_4	-0.0529612	-0.491278	0.385355	0.948417	0.611844	1.47014	0.223635	-0.23682	0.812797	1	schizophrenia
SO4_mean_cat_5	0.0873682	-0.377018	0.551754	1.0913	0.685904	1.7363	0.236936	0.368742	0.71232	1	schizophrenia
SO4_mean_cat_6	0.0629059	-0.423643	0.549455	1.06493	0.654657	1.73231	0.248244	0.253404	0.799956	1	schizophrenia
SO4_mean_cat_7	-0.111669	-0.621332	0.397995	0.89434	0.537228	1.48884	0.260037	-0.429434	0.667607	1	schizophrenia
CO_mean_cat_2	-0.0268226	-0.174307	0.120662	0.973534	0.840039	1.12824	0.0752485	-0.356454	0.721501	2	schizophrenia
CO_mean_cat_3	0.0359286	-0.140109	0.211967	1.03658	0.869263	1.23611	0.089817	0.40002	0.689141	2	schizophrenia
CO_mean_cat_4	0.0644434	-0.136343	0.26523	1.06657	0.872543	1.30373	0.102444	0.629059	0.529311	2	schizophrenia
CO_mean_cat_5	0.211124	-0.00975579	0.432004	1.23507	0.990292	1.54034	0.112696	1.8734	0.0610136	2	schizophrenia
CO_mean_cat_6	0.272849	0.0267234	0.518975	1.3137	1.02708	1.68031	0.125577	2.17277	0.0297977	2	schizophrenia
CO_mean_cat_7	0.263432	-0.0150831	0.541948	1.30139	0.98503	1.71935	0.142102	1.85382	0.0637647	2	schizophrenia
EC_mean_cat_2	0.246962	0.116834	0.37709	1.28013	1.12393	1.45804	0.0663931	3.7197	0.00019946	2	schizophrenia
EC_mean_cat_3	0.235005	0.0639357	0.406075	1.26492	1.06602	1.50091	0.0872819	2.69248	0.00709222	2	schizophrenia
EC_mean_cat_4	0.252164	0.0469429	0.457385	1.28681	1.04806	1.57994	0.104707	2.40829	0.0160274	2	schizophrenia
EC_mean_cat_5	0.197448	-0.0470862	0.441982	1.21829	0.954005	1.55579	0.124765	1.58256	0.113521	2	schizophrenia
EC_mean_cat_6	0.238911	-0.0511334	0.528956	1.26987	0.950152	1.69716	0.147985	1.61443	0.106434	2	schizophrenia
EC_mean_cat_7	0.25436	-0.0854094	0.59413	1.28964	0.918136	1.81145	0.173355	1.46728	0.1423	2	schizophrenia
NH4_mean_cat_2	0.0602154	-0.182625	0.303056	1.06207	0.83308	1.35399	0.123901	0.485997	0.626969	2	schizophrenia
NH4_mean_cat_3	-0.0662587	-0.353695	0.221178	0.935889	0.702089	1.24755	0.146654	-0.451802	0.651411	2	schizophrenia
NH4_mean_cat_4	-0.143494	-0.455743	0.168755	0.866326	0.633977	1.18383	0.159314	-0.900703	0.367746	2	schizophrenia
NH4_mean_cat_5	-0.0892417	-0.422548	0.244064	0.914625	0.655375	1.27643	0.170057	-0.524774	0.59974	2	schizophrenia
NH4_mean_cat_6	-0.0862619	-0.44034	0.267816	0.917354	0.643817	1.30711	0.180655	-0.477494	0.63301	2	schizophrenia
NH4_mean_cat_7	-0.158733	-0.532889	0.215424	0.853224	0.586907	1.24039	0.1909	-0.831498	0.405692	2	schizophrenia
NO2_mean_cat_2	0.0151049	-0.255845	0.286054	1.01522	0.774262	1.33116	0.138242	0.109264	0.912993	2	schizophrenia
NO2_mean_cat_3	0.114574	-0.203585	0.432734	1.1214	0.815801	1.54147	0.162329	0.705814	0.480304	2	schizophrenia
NO2_mean_cat_4	0.141814	-0.207803	0.491431	1.15236	0.812367	1.63465	0.178379	0.795015	0.426605	2	schizophrenia
NO2_mean_cat_5	0.224803	-0.153922	0.603527	1.25208	0.857339	1.82856	0.19323	1.16339	0.24467	2	schizophrenia
NO2_mean_cat_6	0.117689	-0.28952	0.524898	1.12489	0.748623	1.69029	0.207764	0.566456	0.571084	2	schizophrenia
NO2_mean_cat_7	0.188191	-0.241677	0.618058	1.20706	0.78531	1.85532	0.219324	0.858049	0.390866	2	schizophrenia
NO3_mean_cat_2	0.128838	-0.0180301	0.275706	1.13751	0.982131	1.31746	0.0749341	1.71935	0.0855505	2	schizophrenia
NO3_mean_cat_3	0.281163	0.118365	0.443961	1.32467	1.12565	1.55887	0.0830616	3.38499	0.000711808	2	schizophrenia
NO3_mean_cat_4	0.336381	0.158198	0.514563	1.39987	1.1714	1.67291	0.0909112	3.7001	0.000215516	2	schizophrenia
NO3_mean_cat_5	0.406126	0.210975	0.601276	1.50099	1.23488	1.82445	0.0995684	4.07886	4.52564e-05	2	schizophrenia
NO3_mean_cat_6	0.457304	0.243731	0.670877	1.57981	1.276	1.95595	0.108968	4.19669	2.70842e-05	2	schizophrenia
NO3_mean_cat_7	0.42203	0.183054	0.661005	1.52505	1.20088	1.93674	0.121929	3.46128	0.000537605	2	schizophrenia
NOX_mean_cat_2	0.101973	-0.164511	0.368458	1.10735	0.848308	1.4455	0.135964	0.750003	0.453253	2	schizophrenia
NOX_mean_cat_3	0.239863	-0.0637418	0.543468	1.27107	0.938247	1.72197	0.154903	1.54847	0.121509	2	schizophrenia
NOX_mean_cat_4	0.413282	0.0844894	0.742074	1.51177	1.08816	2.10029	0.167754	2.46361	0.0137544	2	schizophrenia
NOX_mean_cat_5	0.498274	0.146617	0.84993	1.64588	1.15791	2.33948	0.17942	2.77714	0.00548399	2	schizophrenia
NOX_mean_cat_6	0.658407	0.28874	1.02807	1.93171	1.33474	2.79568	0.188609	3.49085	0.000481483	2	schizophrenia
NOX_mean_cat_7	0.761563	0.381827	1.1413	2.14162	1.46496	3.13083	0.193746	3.93072	8.46902e-05	2	schizophrenia
O3_mean_cat_2	0.0484712	-0.067154	0.164096	1.04967	0.935051	1.17833	0.0589935	0.821636	0.411284	2	schizophrenia
O3_mean_cat_3	0.124813	-0.0374472	0.287072	1.13294	0.963245	1.33252	0.0827871	1.50763	0.131649	2	schizophrenia
O3_mean_cat_4	0.257001	0.0640609	0.44994	1.29305	1.06616	1.56822	0.0984404	2.61072	0.00903512	2	schizophrenia
O3_mean_cat_5	0.352883	0.13535	0.570417	1.42317	1.14494	1.769	0.110988	3.17946	0.0014755	2	schizophrenia
O3_mean_cat_6	0.50198	0.259682	0.744278	1.65199	1.29652	2.10492	0.123624	4.06055	4.89577e-05	2	schizophrenia
O3_mean_cat_7	0.557809	0.283132	0.832486	1.74684	1.32728	2.29903	0.140144	3.98026	6.88406e-05	2	schizophrenia
OC_mean_cat_2	-0.0093392	-0.121982	0.103304	0.990704	0.885164	1.10883	0.0574721	-0.1625	0.870912	2	schizophrenia
OC_mean_cat_3	0.00727894	-0.137257	0.151814	1.00731	0.871747	1.16394	0.0737439	0.0987056	0.921372	2	schizophrenia
OC_mean_cat_4	-0.037214	-0.210895	0.136467	0.96347	0.809859	1.14622	0.0886142	-0.419956	0.674518	2	schizophrenia
OC_mean_cat_5	-0.0646534	-0.277144	0.147838	0.937392	0.757945	1.15932	0.108416	-0.596347	0.550943	2	schizophrenia
OC_mean_cat_6	-0.0541279	-0.31088	0.202624	0.947311	0.732802	1.22461	0.130998	-0.413196	0.679463	2	schizophrenia
OC_mean_cat_7	0.128255	-0.17818	0.43469	1.13684	0.836792	1.54448	0.156347	0.820321	0.412033	2	schizophrenia
PM10_mean_cat_2	-0.266118	-0.438657	-0.093578	0.766349	0.644902	0.910667	0.0880321	-3.02296	0.00250313	2	schizophrenia
PM10_mean_cat_3	-0.389914	-0.600773	-0.179055	0.677115	0.548387	0.83606	0.107583	-3.6243	0.000289743	2	schizophrenia
PM10_mean_cat_4	-0.593415	-0.833024	-0.353806	0.552438	0.434733	0.702011	0.122252	-4.85404	1.20971e-06	2	schizophrenia
PM10_mean_cat_5	-0.536242	-0.802122	-0.270362	0.584943	0.448377	0.763103	0.135656	-3.95296	7.71888e-05	2	schizophrenia
PM10_mean_cat_6	-0.520845	-0.813849	-0.227841	0.594018	0.443149	0.79625	0.149494	-3.48404	0.000493898	2	schizophrenia
PM10_mean_cat_7	-0.488095	-0.811103	-0.165087	0.613794	0.444367	0.84782	0.164803	-2.96169	0.0030596	2	schizophrenia
PM25_mean_cat_2	-0.0727267	-0.269709	0.124256	0.929855	0.763602	1.13231	0.100503	-0.723626	0.469295	2	schizophrenia
PM25_mean_cat_3	0.0291908	-0.226139	0.284521	1.02962	0.797607	1.32912	0.130273	0.224074	0.822699	2	schizophrenia
PM25_mean_cat_4	0.0405477	-0.255312	0.336407	1.04138	0.774675	1.39991	0.150951	0.268614	0.788227	2	schizophrenia
PM25_mean_cat_5	-0.0694716	-0.394936	0.255993	0.932887	0.673723	1.29174	0.166056	-0.418361	0.675683	2	schizophrenia
PM25_mean_cat_6	-0.14488	-0.496621	0.206861	0.865126	0.608583	1.22981	0.179463	-0.807297	0.419495	2	schizophrenia
PM25_mean_cat_7	-0.206211	-0.590479	0.178056	0.813661	0.554062	1.19489	0.196058	-1.05179	0.292898	2	schizophrenia
SEASALT_mean_cat_2	0.05373	-0.0253645	0.132825	1.0552	0.974954	1.14205	0.0403551	1.33143	0.183047	2	schizophrenia
SEASALT_mean_cat_3	0.00265214	-0.092874	0.0981783	1.00266	0.911308	1.10316	0.0487387	0.0544155	0.956604	2	schizophrenia
SEASALT_mean_cat_4	0.0225222	-0.0821731	0.127218	1.02278	0.921113	1.13566	0.053417	0.421631	0.673294	2	schizophrenia
SEASALT_mean_cat_5	0.024131	-0.0877075	0.13597	1.02442	0.916029	1.14565	0.0570615	0.422895	0.672372	2	schizophrenia
SEASALT_mean_cat_6	0.161815	0.0440675	0.279563	1.17564	1.04505	1.32255	0.0600766	2.69348	0.00707093	2	schizophrenia
SEASALT_mean_cat_7	0.352523	0.220021	0.485026	1.42265	1.2461	1.62422	0.0676045	5.2145	1.84316e-07	2	schizophrenia
sia_mean_cat_2	0.123772	-0.170549	0.418092	1.13176	0.843202	1.51906	0.150166	0.824231	0.409808	2	schizophrenia
sia_mean_cat_3	0.0329479	-0.324773	0.390669	1.0335	0.722691	1.47797	0.182514	0.180522	0.856743	2	schizophrenia
sia_mean_cat_4	0.148466	-0.243264	0.540196	1.16005	0.784065	1.71634	0.199866	0.742829	0.457585	2	schizophrenia
sia_mean_cat_5	0.085745	-0.33417	0.50566	1.08953	0.715932	1.65808	0.214246	0.400217	0.688997	2	schizophrenia
sia_mean_cat_6	0.161454	-0.283672	0.606579	1.17522	0.753014	1.83415	0.227109	0.710908	0.477141	2	schizophrenia
sia_mean_cat_7	0.280975	-0.191505	0.753456	1.32442	0.825716	2.12433	0.241066	1.16556	0.243794	2	schizophrenia
SO2_mean_cat_2	0.126904	-0.0744209	0.328228	1.13531	0.928281	1.38851	0.102718	1.23545	0.216663	2	schizophrenia
SO2_mean_cat_3	0.166825	-0.0784518	0.412101	1.18155	0.924547	1.50999	0.125143	1.33307	0.182509	2	schizophrenia
SO2_mean_cat_4	0.183397	-0.0957117	0.462505	1.20129	0.908726	1.58805	0.142405	1.28785	0.197797	2	schizophrenia
SO2_mean_cat_5	0.118924	-0.187317	0.425164	1.12628	0.829181	1.52984	0.156248	0.761121	0.446585	2	schizophrenia
SO2_mean_cat_6	0.172628	-0.15765	0.502907	1.18842	0.854148	1.65352	0.168513	1.02442	0.305636	2	schizophrenia
SO2_mean_cat_7	0.250283	-0.107716	0.608283	1.28439	0.897882	1.83727	0.182656	1.37024	0.170611	2	schizophrenia
SO4_mean_cat_2	-0.226157	-0.547643	0.0953286	0.797593	0.578311	1.10002	0.164026	-1.37879	0.167961	2	schizophrenia
SO4_mean_cat_3	-0.279588	-0.680904	0.121727	0.756095	0.506159	1.12945	0.204756	-1.36547	0.172106	2	schizophrenia
SO4_mean_cat_4	-0.0519691	-0.490281	0.386342	0.949358	0.612455	1.47159	0.223632	-0.232386	0.816238	2	schizophrenia
SO4_mean_cat_5	0.0882928	-0.376091	0.552677	1.09231	0.68654	1.7379	0.236935	0.372646	0.709412	2	schizophrenia
SO4_mean_cat_6	0.0650023	-0.421549	0.551554	1.06716	0.65603	1.73595	0.248245	0.261847	0.793439	2	schizophrenia
SO4_mean_cat_7	-0.110663	-0.620315	0.398989	0.89524	0.537775	1.49032	0.260032	-0.425576	0.670417	2	schizophrenia
CO_mean_cat_2	-0.0259772	-0.179879	0.127925	0.974357	0.835371	1.13647	0.0785228	-0.330824	0.740778	3	schizophrenia
CO_mean_cat_3	0.03729	-0.147149	0.221729	1.03799	0.863165	1.24823	0.0941033	0.396267	0.691908	3	schizophrenia
CO_mean_cat_4	0.0742332	-0.13651	0.284976	1.07706	0.872398	1.32973	0.107524	0.690387	0.489951	3	schizophrenia
CO_mean_cat_5	0.217868	-0.0144935	0.45023	1.24342	0.985611	1.56867	0.118554	1.83771	0.0661049	3	schizophrenia
CO_mean_cat_6	0.276849	0.0172663	0.536432	1.31897	1.01742	1.7099	0.132443	2.09033	0.036588	3	schizophrenia
CO_mean_cat_7	0.282789	-0.0119916	0.57757	1.32683	0.98808	1.7817	0.150401	1.88023	0.0600763	3	schizophrenia
EC_mean_cat_2	0.233883	0.0976083	0.370157	1.2635	1.10253	1.44796	0.069529	3.36381	0.000768735	3	schizophrenia
EC_mean_cat_3	0.229815	0.050367	0.409263	1.25837	1.05166	1.50571	0.0915567	2.51008	0.0120703	3	schizophrenia
EC_mean_cat_4	0.241767	0.0258393	0.457695	1.2735	1.02618	1.58043	0.110169	2.19451	0.0281991	3	schizophrenia
EC_mean_cat_5	0.192442	-0.0658411	0.450725	1.21221	0.93628	1.56945	0.131779	1.46033	0.144199	3	schizophrenia
EC_mean_cat_6	0.158847	-0.149805	0.467499	1.17216	0.860875	1.596	0.157479	1.00869	0.313124	3	schizophrenia
EC_mean_cat_7	0.135239	-0.229407	0.499884	1.14481	0.795005	1.64853	0.186047	0.726905	0.467284	3	schizophrenia
NH4_mean_cat_2	0.0813286	-0.174066	0.336723	1.08473	0.840241	1.40035	0.130306	0.624137	0.532538	3	schizophrenia
NH4_mean_cat_3	-0.0568853	-0.359031	0.24526	0.944702	0.698353	1.27795	0.154159	-0.369005	0.712124	3	schizophrenia
NH4_mean_cat_4	-0.140043	-0.468799	0.188712	0.869321	0.625753	1.20769	0.167735	-0.834906	0.40377	3	schizophrenia
NH4_mean_cat_5	-0.101574	-0.453021	0.249873	0.903414	0.635705	1.28386	0.179313	-0.566462	0.57108	3	schizophrenia
NH4_mean_cat_6	-0.126274	-0.500273	0.247725	0.881373	0.606365	1.28111	0.190819	-0.661745	0.508134	3	schizophrenia
NH4_mean_cat_7	-0.177584	-0.573461	0.218292	0.83729	0.563572	1.24395	0.201981	-0.879211	0.379287	3	schizophrenia
NO2_mean_cat_2	0.0390235	-0.245451	0.323498	1.03979	0.782352	1.38195	0.145143	0.268863	0.788035	3	schizophrenia
NO2_mean_cat_3	0.166274	-0.167779	0.500327	1.1809	0.845541	1.64926	0.170438	0.975569	0.329278	3	schizophrenia
NO2_mean_cat_4	0.145607	-0.222066	0.513281	1.15674	0.800862	1.67076	0.187592	0.776191	0.437636	3	schizophrenia
NO2_mean_cat_5	0.221962	-0.176985	0.620908	1.24852	0.837792	1.86062	0.203548	1.09046	0.275509	3	schizophrenia
NO2_mean_cat_6	0.133286	-0.29658	0.563153	1.14258	0.743356	1.7562	0.219324	0.607715	0.543377	3	schizophrenia
NO2_mean_cat_7	0.218067	-0.236818	0.672952	1.24367	0.789135	1.96002	0.232088	0.939586	0.34743	3	schizophrenia
NO3_mean_cat_2	0.189895	0.034506	0.345283	1.20912	1.03511	1.41239	0.0792814	2.3952	0.0166114	3	schizophrenia
NO3_mean_cat_3	0.31153	0.138542	0.484518	1.36551	1.1486	1.62339	0.0882609	3.52965	0.00041611	3	schizophrenia
NO3_mean_cat_4	0.395995	0.206606	0.585385	1.48586	1.2295	1.79568	0.0966291	4.09809	4.16568e-05	3	schizophrenia
NO3_mean_cat_5	0.453377	0.245662	0.661091	1.57362	1.27847	1.9369	0.105979	4.278	1.88584e-05	3	schizophrenia
NO3_mean_cat_6	0.506768	0.279053	0.734483	1.65992	1.32188	2.0844	0.116183	4.3618	1.28999e-05	3	schizophrenia
NO3_mean_cat_7	0.487676	0.232479	0.742874	1.62853	1.26172	2.10197	0.130205	3.74544	0.000180075	3	schizophrenia
NOX_mean_cat_2	0.0673504	-0.212449	0.34715	1.06967	0.808601	1.41503	0.142758	0.471782	0.637083	3	schizophrenia
NOX_mean_cat_3	0.182998	-0.136044	0.50204	1.20081	0.872805	1.65209	0.162779	1.12421	0.260924	3	schizophrenia
NOX_mean_cat_4	0.362667	0.0168968	0.708438	1.43716	1.01704	2.03082	0.176417	2.05574	0.0398074	3	schizophrenia
NOX_mean_cat_5	0.443092	0.0726648	0.813519	1.55752	1.07537	2.25583	0.188997	2.34444	0.0190557	3	schizophrenia
NOX_mean_cat_6	0.601847	0.211776	0.991919	1.82549	1.23587	2.6964	0.19902	3.02406	0.00249406	3	schizophrenia
NOX_mean_cat_7	0.691891	0.290667	1.09312	1.99749	1.33732	2.98356	0.20471	3.37986	0.000725235	3	schizophrenia
O3_mean_cat_2	0.0423011	-0.082936	0.167538	1.04321	0.92041	1.18239	0.0638976	0.662013	0.507963	3	schizophrenia
O3_mean_cat_3	0.144819	-0.0299225	0.319561	1.15583	0.970521	1.37652	0.0891556	1.62434	0.104303	3	schizophrenia
O3_mean_cat_4	0.257403	0.0500511	0.464754	1.29357	1.05132	1.59162	0.105794	2.43307	0.0149716	3	schizophrenia
O3_mean_cat_5	0.325341	0.0920789	0.558604	1.3845	1.09645	1.74823	0.119014	2.73365	0.00626371	3	schizophrenia
O3_mean_cat_6	0.462734	0.20376	0.721708	1.58841	1.226	2.05795	0.132132	3.50206	0.000461678	3	schizophrenia
O3_mean_cat_7	0.485284	0.192214	0.778354	1.62464	1.21193	2.17788	0.149528	3.24543	0.00117272	3	schizophrenia
OC_mean_cat_2	-0.0434519	-0.161479	0.0745756	0.957479	0.850884	1.07743	0.0602192	-0.721562	0.470564	3	schizophrenia
OC_mean_cat_3	-0.0526847	-0.204478	0.0991087	0.948679	0.815073	1.10419	0.077447	-0.680268	0.496335	3	schizophrenia
OC_mean_cat_4	-0.0985701	-0.281691	0.0845507	0.906132	0.754507	1.08823	0.0934307	-1.05501	0.291422	3	schizophrenia
OC_mean_cat_5	-0.107324	-0.332072	0.117423	0.898234	0.717436	1.1246	0.114669	-0.935948	0.3493	3	schizophrenia
OC_mean_cat_6	-0.0680214	-0.342301	0.206258	0.93424	0.710135	1.22907	0.139941	-0.486072	0.626916	3	schizophrenia
OC_mean_cat_7	0.172036	-0.158558	0.502629	1.18772	0.853374	1.65306	0.168673	1.01994	0.307759	3	schizophrenia
PM10_mean_cat_2	-0.273987	-0.45456	-0.0934129	0.760342	0.634727	0.910817	0.0921311	-2.97388	0.00294064	3	schizophrenia
PM10_mean_cat_3	-0.373894	-0.594746	-0.153043	0.68805	0.551703	0.858093	0.112682	-3.31815	0.000906149	3	schizophrenia
PM10_mean_cat_4	-0.580342	-0.832041	-0.328642	0.559707	0.43516	0.719901	0.128421	-4.51907	6.21114e-06	3	schizophrenia
PM10_mean_cat_5	-0.517993	-0.798094	-0.237892	0.595715	0.450186	0.788288	0.142911	-3.62457	0.000289438	3	schizophrenia
PM10_mean_cat_6	-0.491778	-0.801358	-0.182198	0.611538	0.448719	0.833436	0.157952	-3.11347	0.00184902	3	schizophrenia
PM10_mean_cat_7	-0.472466	-0.815256	-0.129675	0.623463	0.442526	0.87838	0.174896	-2.70141	0.00690469	3	schizophrenia
PM25_mean_cat_2	-0.0976678	-0.303451	0.108116	0.90695	0.738266	1.11418	0.104993	-0.930227	0.352253	3	schizophrenia
PM25_mean_cat_3	-0.00456605	-0.27172	0.262588	0.995444	0.762067	1.30029	0.136306	-0.0334986	0.973277	3	schizophrenia
PM25_mean_cat_4	-0.00367947	-0.313776	0.306417	0.996327	0.730683	1.35855	0.158215	-0.0232561	0.981446	3	schizophrenia
PM25_mean_cat_5	-0.106954	-0.448815	0.234908	0.898567	0.638384	1.26479	0.174423	-0.613186	0.539753	3	schizophrenia
PM25_mean_cat_6	-0.142999	-0.513422	0.227423	0.866755	0.598444	1.25536	0.188995	-0.756631	0.449271	3	schizophrenia
PM25_mean_cat_7	-0.184106	-0.590651	0.22244	0.831848	0.553966	1.24912	0.207425	-0.887577	0.374768	3	schizophrenia
SEASALT_mean_cat_2	0.0225436	-0.0626703	0.107757	1.0228	0.939253	1.11378	0.0434773	0.518515	0.604099	3	schizophrenia
SEASALT_mean_cat_3	-0.0275004	-0.130063	0.0750627	0.972874	0.87804	1.07795	0.0523291	-0.525528	0.599216	3	schizophrenia
SEASALT_mean_cat_4	-0.00367477	-0.115664	0.108315	0.996332	0.890774	1.1144	0.0571386	-0.0643133	0.948721	3	schizophrenia
SEASALT_mean_cat_5	-0.0121288	-0.131675	0.107417	0.987944	0.876626	1.1134	0.060994	-0.198852	0.842379	3	schizophrenia
SEASALT_mean_cat_6	0.13428	0.008564	0.259995	1.14371	1.0086	1.29692	0.0641418	2.09348	0.0363063	3	schizophrenia
SEASALT_mean_cat_7	0.302135	0.160415	0.443854	1.35274	1.174	1.5587	0.0723071	4.17849	2.93449e-05	3	schizophrenia
sia_mean_cat_2	0.122327	-0.187167	0.431821	1.13012	0.829305	1.54006	0.157908	0.774671	0.438534	3	schizophrenia
sia_mean_cat_3	0.0440041	-0.331456	0.419464	1.04499	0.717878	1.52115	0.191565	0.229709	0.818318	3	schizophrenia
sia_mean_cat_4	0.149843	-0.261766	0.561453	1.16165	0.769691	1.75322	0.210009	0.71351	0.47553	3	schizophrenia
sia_mean_cat_5	0.10309	-0.338822	0.545003	1.10859	0.712609	1.72461	0.22547	0.457225	0.647509	3	schizophrenia
sia_mean_cat_6	0.153423	-0.315737	0.622583	1.16582	0.729251	1.86374	0.239372	0.640939	0.521562	3	schizophrenia
sia_mean_cat_7	0.225258	-0.274006	0.724522	1.25265	0.760327	2.06375	0.254731	0.884297	0.376536	3	schizophrenia
SO2_mean_cat_2	0.181029	-0.0299463	0.392005	1.19845	0.970498	1.47994	0.107643	1.68176	0.0926149	3	schizophrenia
SO2_mean_cat_3	0.200309	-0.0574167	0.458035	1.22178	0.944201	1.58096	0.131495	1.52332	0.127679	3	schizophrenia
SO2_mean_cat_4	0.227636	-0.0658744	0.521146	1.25563	0.936248	1.68396	0.149753	1.52008	0.128492	3	schizophrenia
SO2_mean_cat_5	0.148197	-0.174453	0.470847	1.15974	0.839917	1.60135	0.16462	0.900237	0.367994	3	schizophrenia
SO2_mean_cat_6	0.205188	-0.143419	0.553795	1.22776	0.866391	1.73984	0.177864	1.15362	0.248656	3	schizophrenia
SO2_mean_cat_7	0.262671	-0.116331	0.641672	1.3004	0.890181	1.89965	0.193372	1.35837	0.174345	3	schizophrenia
SO4_mean_cat_2	-0.289555	-0.626018	0.0469083	0.748597	0.534717	1.04803	0.171668	-1.68671	0.0916584	3	schizophrenia
SO4_mean_cat_3	-0.327429	-0.746943	0.0920845	0.720774	0.473813	1.09646	0.214042	-1.52975	0.12608	3	schizophrenia
SO4_mean_cat_4	-0.081354	-0.540339	0.377631	0.921867	0.582551	1.45882	0.23418	-0.347399	0.728292	3	schizophrenia
SO4_mean_cat_5	0.0785803	-0.408587	0.565747	1.08175	0.664589	1.76076	0.248559	0.316143	0.751894	3	schizophrenia
SO4_mean_cat_6	0.0794762	-0.431777	0.590729	1.08272	0.649354	1.8053	0.260848	0.304684	0.760607	3	schizophrenia
SO4_mean_cat_7	-0.103571	-0.640211	0.433069	0.901612	0.527181	1.54198	0.273801	-0.37827	0.70523	3	schizophrenia
CO_mean_cat_2	-0.0284855	-0.182566	0.125595	0.971916	0.83313	1.13382	0.0786138	-0.362347	0.717093	4	schizophrenia
CO_mean_cat_3	0.026221	-0.158633	0.211075	1.02657	0.853309	1.23501	0.0943152	0.278015	0.781001	4	schizophrenia
CO_mean_cat_4	0.0571883	-0.154227	0.268604	1.05886	0.857077	1.30814	0.107867	0.530174	0.595992	4	schizophrenia
CO_mean_cat_5	0.187342	-0.0460396	0.420723	1.20604	0.955004	1.52306	0.119074	1.57332	0.115645	4	schizophrenia
CO_mean_cat_6	0.239308	-0.0215534	0.50017	1.27037	0.978677	1.649	0.133095	1.79802	0.0721732	4	schizophrenia
CO_mean_cat_7	0.261724	-0.0352043	0.558653	1.29917	0.965408	1.74832	0.151497	1.72759	0.0840621	4	schizophrenia
EC_mean_cat_2	0.238228	0.100925	0.37553	1.269	1.10619	1.45576	0.0700535	3.40065	0.000672254	4	schizophrenia
EC_mean_cat_3	0.226937	0.0461289	0.407746	1.25475	1.04721	1.50342	0.0922508	2.46	0.0138936	4	schizophrenia
EC_mean_cat_4	0.238764	0.020866	0.456663	1.26968	1.02109	1.5788	0.111175	2.14765	0.0317415	4	schizophrenia
EC_mean_cat_5	0.222066	-0.038468	0.482601	1.24865	0.962263	1.62028	0.132928	1.67057	0.0948057	4	schizophrenia
EC_mean_cat_6	0.183295	-0.127572	0.494162	1.20117	0.88023	1.63912	0.158608	1.15565	0.247826	4	schizophrenia
EC_mean_cat_7	0.0814814	-0.285161	0.448124	1.08489	0.751893	1.56537	0.187066	0.435576	0.663144	4	schizophrenia
NH4_mean_cat_2	0.0808835	-0.17433	0.336097	1.08424	0.84002	1.39947	0.130213	0.621162	0.534493	4	schizophrenia
NH4_mean_cat_3	-0.0758679	-0.378582	0.226846	0.926939	0.684832	1.25464	0.154449	-0.491217	0.623273	4	schizophrenia
NH4_mean_cat_4	-0.160159	-0.490012	0.169694	0.852008	0.612619	1.18494	0.168295	-0.951654	0.341273	4	schizophrenia
NH4_mean_cat_5	-0.133101	-0.486222	0.22002	0.875377	0.614945	1.2461	0.180167	-0.738764	0.46005	4	schizophrenia
NH4_mean_cat_6	-0.161881	-0.538045	0.214283	0.850542	0.583889	1.23897	0.191924	-0.843464	0.398969	4	schizophrenia
NH4_mean_cat_7	-0.213541	-0.612107	0.185025	0.807719	0.542207	1.20325	0.203354	-1.05009	0.293675	4	schizophrenia
NO2_mean_cat_2	0.0574068	-0.228992	0.343805	1.05909	0.795335	1.4103	0.146124	0.392863	0.694421	4	schizophrenia
NO2_mean_cat_3	0.146028	-0.190638	0.482694	1.15723	0.826432	1.62043	0.171771	0.850129	0.395253	4	schizophrenia
NO2_mean_cat_4	0.0619053	-0.308752	0.432563	1.06386	0.734363	1.5412	0.189115	0.327343	0.743409	4	schizophrenia
NO2_mean_cat_5	0.083249	-0.318295	0.484793	1.08681	0.727388	1.62384	0.204873	0.406344	0.68449	4	schizophrenia
NO2_mean_cat_6	-0.0232914	-0.455422	0.40884	0.976978	0.63418	1.50507	0.220479	-0.10564	0.915868	4	schizophrenia
NO2_mean_cat_7	0.023762	-0.43391	0.481434	1.02405	0.64797	1.61839	0.233511	0.10176	0.918947	4	schizophrenia
NO3_mean_cat_2	0.17552	0.019716	0.331324	1.19187	1.01991	1.39281	0.0794932	2.20799	0.0272453	4	schizophrenia
NO3_mean_cat_3	0.281137	0.107209	0.455064	1.32463	1.11317	1.57627	0.0887402	3.16809	0.00153445	4	schizophrenia
NO3_mean_cat_4	0.36705	0.176352	0.557749	1.44347	1.19286	1.74674	0.097297	3.77247	0.000161637	4	schizophrenia
NO3_mean_cat_5	0.414857	0.205353	0.624362	1.51415	1.22796	1.86705	0.106892	3.88109	0.000103989	4	schizophrenia
NO3_mean_cat_6	0.450912	0.221233	0.680591	1.56974	1.24761	1.97504	0.117185	3.84785	0.000119158	4	schizophrenia
NO3_mean_cat_7	0.424276	0.16684	0.681711	1.52848	1.18157	1.97726	0.131347	3.23019	0.00123709	4	schizophrenia
NOX_mean_cat_2	0.0570293	-0.224522	0.33858	1.05869	0.798898	1.40295	0.143651	0.396999	0.691368	4	schizophrenia
NOX_mean_cat_3	0.200585	-0.120832	0.522002	1.22212	0.886183	1.6854	0.163991	1.22315	0.221275	4	schizophrenia
NOX_mean_cat_4	0.407908	0.0593164	0.7565	1.50367	1.06111	2.13081	0.177856	2.29347	0.0218209	4	schizophrenia
NOX_mean_cat_5	0.510074	0.136553	0.883595	1.66541	1.14632	2.41958	0.190575	2.6765	0.00743964	4	schizophrenia
NOX_mean_cat_6	0.681839	0.28828	1.0754	1.97751	1.33413	2.93116	0.200799	3.39563	0.000684721	4	schizophrenia
NOX_mean_cat_7	0.762809	0.357691	1.16793	2.14429	1.43002	3.21532	0.206696	3.69048	0.000223831	4	schizophrenia
O3_mean_cat_2	0.0621958	-0.0648908	0.189282	1.06417	0.93717	1.20838	0.0648413	0.959201	0.337458	4	schizophrenia
O3_mean_cat_3	0.15287	-0.0235074	0.329248	1.16517	0.976767	1.38992	0.0899902	1.69874	0.0893678	4	schizophrenia
O3_mean_cat_4	0.243834	0.0351562	0.452513	1.27613	1.03578	1.57226	0.10647	2.29016	0.022012	4	schizophrenia
O3_mean_cat_5	0.278542	0.0443257	0.512758	1.3212	1.04532	1.66989	0.1195	2.33089	0.0197592	4	schizophrenia
O3_mean_cat_6	0.39691	0.137271	0.65655	1.48722	1.14714	1.92813	0.132472	2.99619	0.00273375	4	schizophrenia
O3_mean_cat_7	0.43557	0.141798	0.729341	1.54584	1.15234	2.07371	0.149886	2.906	0.00366079	4	schizophrenia
OC_mean_cat_2	-0.0161583	-0.134405	0.102088	0.983972	0.874236	1.10748	0.060331	-0.267827	0.788832	4	schizophrenia
OC_mean_cat_3	-0.0200517	-0.1723	0.132197	0.980148	0.841726	1.14133	0.0776793	-0.258135	0.796303	4	schizophrenia
OC_mean_cat_4	-0.0247106	-0.20829	0.158869	0.975592	0.811972	1.17218	0.0936646	-0.263821	0.791918	4	schizophrenia
OC_mean_cat_5	0.0076682	-0.217467	0.232804	1.0077	0.804554	1.26213	0.114867	0.0667571	0.946775	4	schizophrenia
OC_mean_cat_6	0.111965	-0.165394	0.389325	1.11847	0.847559	1.47598	0.141513	0.791204	0.428825	4	schizophrenia
OC_mean_cat_7	0.330847	-0.00347795	0.665173	1.39215	0.996528	1.94483	0.170577	1.93957	0.0524314	4	schizophrenia
PM10_mean_cat_2	-0.274581	-0.455522	-0.0936391	0.759891	0.634117	0.910611	0.0923188	-2.97427	0.00293691	4	schizophrenia
PM10_mean_cat_3	-0.376302	-0.598051	-0.154553	0.686395	0.549882	0.856798	0.113139	-3.326	0.000881016	4	schizophrenia
PM10_mean_cat_4	-0.583228	-0.836269	-0.330187	0.558094	0.433324	0.718789	0.129105	-4.51748	6.25812e-06	4	schizophrenia
PM10_mean_cat_5	-0.524178	-0.805962	-0.242393	0.592042	0.446658	0.784748	0.14377	-3.64594	0.000266415	4	schizophrenia
PM10_mean_cat_6	-0.490857	-0.802422	-0.179293	0.612101	0.448242	0.835861	0.158964	-3.08785	0.00201613	4	schizophrenia
PM10_mean_cat_7	-0.464523	-0.80953	-0.119516	0.628435	0.445067	0.88735	0.176027	-2.63893	0.00831692	4	schizophrenia
PM25_mean_cat_2	-0.0705919	-0.277006	0.135822	0.931842	0.75805	1.14548	0.105315	-0.670292	0.502672	4	schizophrenia
PM25_mean_cat_3	0.0470559	-0.22119	0.315302	1.04818	0.801564	1.37067	0.136863	0.343818	0.730983	4	schizophrenia
PM25_mean_cat_4	0.0700913	-0.24147	0.381653	1.07261	0.785472	1.4647	0.158963	0.440929	0.659264	4	schizophrenia
PM25_mean_cat_5	-0.0154731	-0.359375	0.328429	0.984646	0.698112	1.38878	0.175464	-0.088184	0.92973	4	schizophrenia
PM25_mean_cat_6	-0.0480548	-0.421106	0.324996	0.953082	0.656321	1.38403	0.190336	-0.252474	0.800675	4	schizophrenia
PM25_mean_cat_7	-0.0881723	-0.498009	0.321664	0.915603	0.60774	1.37942	0.209104	-0.421667	0.673268	4	schizophrenia
SEASALT_mean_cat_2	0.000778213	-0.0875139	0.0890703	1.00078	0.916206	1.09316	0.0450478	0.0172753	0.986217	4	schizophrenia
SEASALT_mean_cat_3	-0.0499773	-0.159068	0.0591131	0.951251	0.852939	1.0609	0.0556594	-0.897913	0.369232	4	schizophrenia
SEASALT_mean_cat_4	0.00337322	-0.120188	0.126934	1.00338	0.886754	1.13534	0.0630425	0.0535071	0.957328	4	schizophrenia
SEASALT_mean_cat_5	-0.0105111	-0.138862	0.11784	0.989544	0.870348	1.12506	0.0654864	-0.160508	0.872481	4	schizophrenia
SEASALT_mean_cat_6	0.133774	-0.00151647	0.269065	1.14313	0.998485	1.30874	0.0690273	1.93799	0.0526238	4	schizophrenia
SEASALT_mean_cat_7	0.294956	0.144812	0.445101	1.34307	1.15582	1.56065	0.0766059	3.85031	0.000117968	4	schizophrenia
sia_mean_cat_2	0.109149	-0.199249	0.417547	1.11533	0.819346	1.51823	0.157349	0.693677	0.487885	4	schizophrenia
sia_mean_cat_3	0.0240117	-0.350702	0.398725	1.0243	0.704194	1.48992	0.191184	0.125595	0.900053	4	schizophrenia
sia_mean_cat_4	0.112674	-0.298331	0.523679	1.11927	0.742056	1.68823	0.2097	0.537311	0.591053	4	schizophrenia
sia_mean_cat_5	0.0574359	-0.383965	0.498836	1.05912	0.681156	1.6468	0.225208	0.255034	0.798697	4	schizophrenia
sia_mean_cat_6	0.0898248	-0.378959	0.558608	1.09398	0.684574	1.74824	0.23918	0.375554	0.707249	4	schizophrenia
sia_mean_cat_7	0.157293	-0.34184	0.656426	1.17034	0.710462	1.92789	0.254664	0.61765	0.536806	4	schizophrenia
SO2_mean_cat_2	0.148233	-0.0623528	0.358818	1.15978	0.939551	1.43164	0.107443	1.37963	0.1677	4	schizophrenia
SO2_mean_cat_3	0.13964	-0.117724	0.397003	1.14986	0.888941	1.48736	0.13131	1.06343	0.287586	4	schizophrenia
SO2_mean_cat_4	0.138531	-0.154837	0.431898	1.14858	0.856555	1.54018	0.14968	0.925511	0.3547	4	schizophrenia
SO2_mean_cat_5	0.0446106	-0.278125	0.367346	1.04562	0.757202	1.4439	0.164664	0.270919	0.786453	4	schizophrenia
SO2_mean_cat_6	0.0936426	-0.2551	0.442385	1.09817	0.774839	1.55641	0.177933	0.52628	0.598693	4	schizophrenia
SO2_mean_cat_7	0.134829	-0.244433	0.51409	1.14434	0.783149	1.67212	0.193504	0.696774	0.485944	4	schizophrenia
SO4_mean_cat_2	-0.300225	-0.635385	0.034934	0.740651	0.529732	1.03555	0.171003	-1.75568	0.0791439	4	schizophrenia
SO4_mean_cat_3	-0.353111	-0.7716	0.0653792	0.7025	0.462273	1.06756	0.213519	-1.65377	0.0981751	4	schizophrenia
SO4_mean_cat_4	-0.108952	-0.566764	0.348861	0.896774	0.567358	1.41745	0.233582	-0.466438	0.640902	4	schizophrenia
SO4_mean_cat_5	0.0459754	-0.440099	0.53205	1.04705	0.643972	1.70242	0.248002	0.185383	0.852928	4	schizophrenia
SO4_mean_cat_6	0.047705	-0.462458	0.557868	1.04886	0.629734	1.74694	0.260292	0.183275	0.854582	4	schizophrenia
SO4_mean_cat_7	-0.138198	-0.673848	0.397453	0.870927	0.509743	1.48803	0.273296	-0.50567	0.613088	4	schizophrenia
